# Supplementary material for: Technical validation of real-world monitoring of gait: a multicentric observational study
Source: PubMed Central journal article supplement — BMJ Open. 2021 Dec 2;11(12):e050785. doi: 10.1136/bmjopen-2021-050785 (PMC8640671; doi:10.1136/bmjopen-2021-050785), 2021-12-02
Supplement: bmjopen-2021-050785.draft_revisions.pdf [file bmjopen-2021-050785.draft_revisions.pdf]

# BMJ Open

BMJ Open is committed to open peer review. As part of this commitment we make the peer review history of every article we publish publicly available.

When an article is published we post the peer reviewers' comments and the authors' responses online. We also post the versions of the paper that were used during peer review. These are the versions that the peer review comments apply to.

The versions of the paper that follow are the versions that were submitted during the peer review process. They are not the versions of record or the final published versions. They should not be cited or distributed as the published version of this manuscript.

BMJ Open is an open access journal and the full, final, typeset and author-corrected version of record of the manuscript is available on our site with no access controls, subscription charges or pay-per-view fees (<http://bmjopen.bmj.com>).

If you have any questions on BMJ Open's open peer review process please email [info.bmjopen@bmj.com](mailto:info.bmjopen@bmj.com)

# BMJ Open

## A TECHNICAL VALIDATION PROTOCOL FOR REAL-WORLD MONITORING OF GAIT

|                               |                                                                                                                                                                                                                                                                                                                                                                                                                                                                                                                                                                                                                                                                                                                                                                                                                                                                                                                                                                                                                                                                                                                                                                                                                                                                                                                                                                                                                                                                                                                                                                                                                                                                                                                                                                                                                                                                                                                                                                                                                                                                                                                                                                                                                                                                                                                                                                                                                                                                                                             |
|-------------------------------|-------------------------------------------------------------------------------------------------------------------------------------------------------------------------------------------------------------------------------------------------------------------------------------------------------------------------------------------------------------------------------------------------------------------------------------------------------------------------------------------------------------------------------------------------------------------------------------------------------------------------------------------------------------------------------------------------------------------------------------------------------------------------------------------------------------------------------------------------------------------------------------------------------------------------------------------------------------------------------------------------------------------------------------------------------------------------------------------------------------------------------------------------------------------------------------------------------------------------------------------------------------------------------------------------------------------------------------------------------------------------------------------------------------------------------------------------------------------------------------------------------------------------------------------------------------------------------------------------------------------------------------------------------------------------------------------------------------------------------------------------------------------------------------------------------------------------------------------------------------------------------------------------------------------------------------------------------------------------------------------------------------------------------------------------------------------------------------------------------------------------------------------------------------------------------------------------------------------------------------------------------------------------------------------------------------------------------------------------------------------------------------------------------------------------------------------------------------------------------------------------------------|
| Journal:                      | <i>BMJ Open</i>                                                                                                                                                                                                                                                                                                                                                                                                                                                                                                                                                                                                                                                                                                                                                                                                                                                                                                                                                                                                                                                                                                                                                                                                                                                                                                                                                                                                                                                                                                                                                                                                                                                                                                                                                                                                                                                                                                                                                                                                                                                                                                                                                                                                                                                                                                                                                                                                                                                                                             |
| Manuscript ID                 | bmjopen-2021-050785                                                                                                                                                                                                                                                                                                                                                                                                                                                                                                                                                                                                                                                                                                                                                                                                                                                                                                                                                                                                                                                                                                                                                                                                                                                                                                                                                                                                                                                                                                                                                                                                                                                                                                                                                                                                                                                                                                                                                                                                                                                                                                                                                                                                                                                                                                                                                                                                                                                                                         |
| Article Type:                 | Protocol                                                                                                                                                                                                                                                                                                                                                                                                                                                                                                                                                                                                                                                                                                                                                                                                                                                                                                                                                                                                                                                                                                                                                                                                                                                                                                                                                                                                                                                                                                                                                                                                                                                                                                                                                                                                                                                                                                                                                                                                                                                                                                                                                                                                                                                                                                                                                                                                                                                                                                    |
| Date Submitted by the Author: | 02-Mar-2021                                                                                                                                                                                                                                                                                                                                                                                                                                                                                                                                                                                                                                                                                                                                                                                                                                                                                                                                                                                                                                                                                                                                                                                                                                                                                                                                                                                                                                                                                                                                                                                                                                                                                                                                                                                                                                                                                                                                                                                                                                                                                                                                                                                                                                                                                                                                                                                                                                                                                                 |
| Complete List of Authors:     | <p>Mazzà, Claudia; The University of Sheffield, INSIGNEO Institute for in silico Medicine; The University of Sheffield, Department of Mechanical Engineering</p> <p>Alcock, Lisa; University of Newcastle upon Tyne, Translational and Clinical Research Institute, Faculty of Medical Sciences</p> <p>Aminian, Kamiar; Ecole Polytechnique Federale de Lausanne, Laboratory of Movement Analysis and Measurement</p> <p>Becker, Clemens; Robert Bosch Gesellschaft für Medizinische Forschung</p> <p>Bertuletti, Stefano; University of Sassari, Department of Biomedical Sciences</p> <p>Bonci, Tecla; The University of Sheffield, INSIGNEO Institute for in silico Medicine; The University of Sheffield, Department of Mechanical Engineering</p> <p>Brown, Philip; Newcastle Upon Tyne Hospitals NHS Foundation Trust</p> <p>Brozgol, Marina; Tel Aviv Sourasky Medical Center, Center for the Study of Movement, Cognition and Mobility, Neurological Institute</p> <p>Buckley, Ellen; The University of Sheffield, INSIGNEO Institute for in silico Medicine; The University of Sheffield, Department of Mechanical Engineering</p> <p>Carsin, Anne-Elie; Instituto de Salud Global Barcelona</p> <p>Caruso, Marco; Politecnico di Torino Dipartimento di Elettronica e Telecomunicazioni; Politecnico di Torino, PolitoBIOMed Lab – Biomedical Engineering Lab</p> <p>Caulfield, Brian; University College Dublin, Insight Centre for Data Analytics, O'Brien Science Centre; University College Dublin, UCD School of Public Health, Physiotherapy and Sports Science</p> <p>Cereatti, Andrea; Politecnico di Torino Dipartimento di Elettronica e Telecomunicazioni</p> <p>Chiari, Lorenzo; University of Bologna, Department of Electrical, Electronic and Information Engineering «Guglielmo Marconi»; University of Bologna, Health Sciences and Technologies—Interdepartmental Center for Industrial Research (CIRI-SDV)</p> <p>Chynkiamis, Nikolaos; Northumbria University Newcastle, Department of Sport, Exercise and Rehabilitation</p> <p>Ciravegna, Fabio; The University of Sheffield, Department of Computer Science; The University of Sheffield, INSIGNEO Institute for in silico Medicine</p> <p>Del Din, Silvia; University of Newcastle upon Tyne, Translational and Clinical Research Institute, Faculty of Medical Sciences</p> <p>Eskofier, Björn; Friedrich-Alexander-Universität Erlangen-Nürnberg, Machine Learning and Data Analytics Lab, Department of Artificial</p> |

|    |                                                                              |
|----|------------------------------------------------------------------------------|
| 1  |                                                                              |
| 2  |                                                                              |
| 3  |                                                                              |
| 4  | Intelligence in Biomedical Engineering                                       |
| 5  | Evers, Jordi; McRoberts BV                                                   |
| 6  | Garcia Aymerich, Judith; Instituto de Salud Global Barcelona                 |
| 7  | Gazit, Eran; Tel Aviv Sourasky Medical Center, Center for the Study of       |
| 8  | Movement, Cognition and Mobility, Neurological Institute                     |
| 9  | Hansen, Clint; University Medical Center Schleswig-Holstein Campus           |
| 10 | Kiel, Department of Neurology                                                |
| 11 | Hausdorff, Jeffrey; Tel Aviv Sourasky Medical Center, Center for the         |
| 12 | Study of Movement, Cognition and Mobility, Neurological Institute; Tel       |
| 13 | Aviv University, Department of Physical Therapy, Sackler Faculty of          |
| 14 | Medicine & Sagol School of Neuroscience                                      |
| 15 | Helbostad, Jorunn; Norwegian University of Science and Technology,           |
| 16 | Department of Neuromedicine and Movement Science                             |
| 17 | Hiden, Hugo; University of Newcastle upon Tyne, School of Computing          |
| 18 | Hume, Emily; Northumbria University Newcastle, Department of Sport,          |
| 19 | Exercise and Rehabilitation                                                  |
| 20 | Paraschiv-Ionescu, Anisoara; Ecole Polytechnique Federale de Lausanne,       |
| 21 | Laboratory of Movement Analysis and Measurement                              |
| 22 | Ireson, Neil; The University of Sheffield, Department of Computer            |
| 23 | Science; The University of Sheffield, INSIGNEO Institute for in silico       |
| 24 | Medicine                                                                     |
| 25 | Keogh, Alison; University College Dublin, Insight Centre for Data            |
| 26 | Analytics, O'Brien Science Centre; University College Dublin, UCD School     |
| 27 | of Public Health, Physiotherapy and Sports Science                           |
| 28 | Kirk, Cameron; University of Newcastle upon Tyne, Translational and          |
| 29 | Clinical Research Institute, Faculty of Medical Sciences                     |
| 30 | Kluge, Felix; Friedrich-Alexander-Universität Erlangen-Nürnberg,             |
| 31 | Machine Learning and Data Analytics Lab, Department of Artificial            |
| 32 | Intelligence in Biomedical Engineering                                       |
| 33 | Koch, Sarah; Instituto de Salud Global Barcelona                             |
| 34 | Küderle, Arne; Friedrich-Alexander-Universität Erlangen-Nürnberg,            |
| 35 | Machine Learning and Data Analytics Lab, Department of Artificial            |
| 36 | Intelligence in Biomedical Engineering                                       |
| 37 | Maetzler, Walter; University Medical Center Schleswig-Holstein Campus        |
| 38 | Kiel, Department of Neurology                                                |
| 39 | Micó-Amigo, M. Encarna; University of Newcastle upon Tyne,                   |
| 40 | Translational and Clinical Research Institute, Faculty of Medical Sciences   |
| 41 | Mueller, Arne; Novartis Pharma AG, Novartis Institutes of Biomedical         |
| 42 | Research                                                                     |
| 43 | Neatrou, Isabel; University of Newcastle upon Tyne, Translational and        |
| 44 | Clinical Research Institute, Faculty of Medical Sciences                     |
| 45 | Niessen, Martjin; McRoberts BV                                               |
| 46 | Palmerini, Luca; University of Bologna, Department of Electrical,            |
| 47 | Electronic and Information Engineering «Guglielmo Marconi»; University       |
| 48 | of Bologna, Health Sciences and Technologies—Interdepartmental Center        |
| 49 | for Industrial Research (CIRI-SDV)                                           |
| 50 | Pluimgraaff, Lucas; McRoberts BV                                             |
| 51 | Reggi, Luca; University of Bologna, Health Sciences and Technologies—        |
| 52 | Interdepartmental Center for Industrial Research (CIRI-SDV)                  |
| 53 | Salis, Francesca; University of Sassari, Department of Biomedical            |
| 54 | Sciences                                                                     |
| 55 | Schwickert, Lars; Robert Bosch Gesellschaft für Medizinische Forschung       |
| 56 | Scott, Kirsty; The University of Sheffield, INSIGNEO Institute for in silico |
| 57 | Medicine; The University of Sheffield, Department of Mechanical              |
| 58 | Engineering                                                                  |
| 59 | Sharrack, Basil; Sheffield Teaching Hospitals NHS Foundation Trust,          |
| 60 | Department of Neuroscience and Sheffield NIHR Translational                  |
|    | Neuroscience BRC                                                             |
|    | Sillen, Henrik; AstraZeneca Sweden, Digital Health R&D                       |
|    | Singleton, David; University College Dublin, Insight Centre for Data         |
|    | Analytics, O'Brien Science Centre; University College Dublin, UCD School     |

|           |                                                                                                                                                                                                                                                                                                                                                                                                                                                                                                                                                                                                                                                                                                                                                                                                                                                                                                                                                                                                                                                                                                                                                                                                                                                                                                                                           |
|-----------|-------------------------------------------------------------------------------------------------------------------------------------------------------------------------------------------------------------------------------------------------------------------------------------------------------------------------------------------------------------------------------------------------------------------------------------------------------------------------------------------------------------------------------------------------------------------------------------------------------------------------------------------------------------------------------------------------------------------------------------------------------------------------------------------------------------------------------------------------------------------------------------------------------------------------------------------------------------------------------------------------------------------------------------------------------------------------------------------------------------------------------------------------------------------------------------------------------------------------------------------------------------------------------------------------------------------------------------------|
|           | <p>of Public Health, Physiotherapy and Sports Science<br/> Soltani, Abolfazi; Ecole Polytechnique Federale de Lausanne, Laboratory of Movement Analysis and Measurement<br/> Taraldsen, Kristin; Norwegian University of Science and Technology, Department of Neuromedicine and Movement Science<br/> Ullrich, Martin; Friedrich-Alexander-Universität Erlangen-Nürnberg, Machine Learning and Data Analytics Lab, Department of Computer Science<br/> Van Gelder, Linda; The University of Sheffield, INSIGNEO Institute for in silico Medicine; The University of Sheffield, Department of Mechanical Engineering<br/> Vereijken, Beatrix; Norwegian University of Science and Technology, Department of Neuromedicine and Movement Science<br/> Vogiatzis, Ioannis ; Northumbria University Newcastle, Department of Sport, Exercise and Rehabilitation<br/> Warmerdam, Elke; University Medical Center Schleswig-Holstein Campus Kiel, Department of Neurology<br/> Yarnall, Alison; Newcastle University Faculty of Medical Sciences, Translational and Clinical Research Institute; Newcastle Upon Tyne Hospitals NHS Foundation Trust<br/> Rochester, Lynn; University of Newcastle upon Tyne, Translational and Clinical Research Institute, Faculty of Medical Sciences; Newcastle Upon Tyne Hospitals NHS Foundation Trust</p> |
| Keywords: | <p>Multiple sclerosis &lt; NEUROLOGY, Parkinson-s disease &lt; NEUROLOGY, Hip &lt; ORTHOPAEDIC &amp; TRAUMA SURGERY, Chronic airways disease &lt; THORACIC MEDICINE, Heart failure &lt; CARDIOLOGY</p>                                                                                                                                                                                                                                                                                                                                                                                                                                                                                                                                                                                                                                                                                                                                                                                                                                                                                                                                                                                                                                                                                                                                    |
|           |                                                                                                                                                                                                                                                                                                                                                                                                                                                                                                                                                                                                                                                                                                                                                                                                                                                                                                                                                                                                                                                                                                                                                                                                                                                                                                                                           |

SCHOLARONE™  
Manuscripts

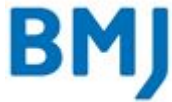

I, the Submitting Author has the right to grant and does grant on behalf of all authors of the Work (as defined in the below author licence), an exclusive licence and/or a non-exclusive licence for contributions from authors who are: i) UK Crown employees; ii) where BMJ has agreed a CC-BY licence shall apply, and/or iii) in accordance with the terms applicable for US Federal Government officers or employees acting as part of their official duties; on a worldwide, perpetual, irrevocable, royalty-free basis to BMJ Publishing Group Ltd ("BMJ") its licensees and where the relevant Journal is co-owned by BMJ to the co-owners of the Journal, to publish the Work in this journal and any other BMJ products and to exploit all rights, as set out in our [licence](#).

The Submitting Author accepts and understands that any supply made under these terms is made by BMJ to the Submitting Author unless you are acting as an employee on behalf of your employer or a postgraduate student of an affiliated institution which is paying any applicable article publishing charge ("APC") for Open Access articles. Where the Submitting Author wishes to make the Work available on an Open Access basis (and intends to pay the relevant APC), the terms of reuse of such Open Access shall be governed by a Creative Commons licence – details of these licences and which [Creative Commons](#) licence will apply to this Work are set out in our licence referred to above.

Other than as permitted in any relevant BMJ Author's Self Archiving Policies, I confirm this Work has not been accepted for publication elsewhere, is not being considered for publication elsewhere and does not duplicate material already published. I confirm all authors consent to publication of this Work and authorise the granting of this licence.

# A TECHNICAL VALIDATION PROTOCOL FOR REAL-WORLD MONITORING OF GAIT

Mazzà Claudia<sup>1,2</sup>, Alcock Lisa<sup>3</sup>, Aminian Kamiar<sup>4</sup>, Becker Clemens<sup>5</sup>, Bertuletti Stefano<sup>6</sup>, Bonci Tecla<sup>1,2</sup>, Brown Philip<sup>7</sup>, Brozgol Marina<sup>8</sup>, Buckley Ellen<sup>1,2</sup>, Carsin Anne-Elie<sup>9</sup>, Caruso Marco<sup>10,11</sup>, Caulfield Brian<sup>12,13</sup>, Cereatti Andrea<sup>10</sup>, Chiari Lorenzo<sup>14,15</sup>, Chynkiamis Nikolaos<sup>16</sup>, Ciravegna Fabio<sup>1,17</sup>, Del Din Silvia<sup>3</sup>, Eskofier Björn<sup>18</sup>, Evers Jordi<sup>19</sup>, Garcia-Aymerich, Judith<sup>9</sup>, Gazit Eran<sup>8</sup>, Hansen Clint<sup>20</sup>, Hausdorff Jeffrey<sup>8,21</sup>, Helbostad Jorunn<sup>22</sup>, Hiden Hugo<sup>23</sup>, Hume Emily<sup>16</sup>, Paraschiv-Ionescu Anisoara<sup>4</sup>, Ireson Neil<sup>1,17</sup>, Keogh Alison<sup>12,13</sup>, Kirk Cameron<sup>3</sup>, Kluge Felix<sup>18</sup>, Koch Sarah<sup>9</sup>, Küderle Arne<sup>18</sup>, Maetzler Walter<sup>20</sup>, Micó-Amigo M. Encarna<sup>3</sup>, Mueller Arne<sup>24</sup>, Neatrour Isabel<sup>3</sup>, Niessen Martjin<sup>19</sup>, Palmerini Luca<sup>14,15</sup>, Pluimgraaff Lucas<sup>19</sup>, Luca Reggi<sup>15</sup>, Salis Francesca<sup>6</sup>, Schwickert Lars<sup>5</sup>, Scott Kirsty<sup>1,2</sup>, Sharrack Basil<sup>25</sup>, Sillen Henrik<sup>26</sup>, Singleton David<sup>12,13</sup>, Soltani Abolfazi<sup>4</sup>, Taraldsen Kristin<sup>22</sup>, Ullrich Martin<sup>18</sup>, Van Gelder Linda<sup>1,2</sup>, Vereijken Beatrix<sup>22</sup>, Vogiatzis, Ioannis<sup>16</sup>, Warmerdam Elke<sup>20</sup>, Yarnall Alison<sup>3,7</sup>, Rochester Lynn<sup>3,7</sup>

## Corresponding author:

Prof. Claudia Mazzà

[c.mazza@sheffield.ac.uk](mailto:c.mazza@sheffield.ac.uk)

Pam Liversidge Building - Room F14

Mappin Street, Sheffield, S1 3JD, UK

Phone: +44 (0)114 2226073

1. INSIGNEO Institute for in silico Medicine, The University of Sheffield, Sheffield, UK
2. Department of Mechanical Engineering, The University of Sheffield, Sheffield, UK
3. Translational and Clinical Research Institute, Faculty of Medical Sciences, University of Newcastle upon Tyne, Newcastle upon Tyne, UK
4. Laboratory of Movement Analysis and Measurement, Ecole Polytechnique Federale de Lausanne, Lausanne, Switzerland
5. Robert Bosch Gesellschaft für Medizinische Forschung, Stuttgart, Germany
6. Department of Biomedical Sciences, University of Sassari, Sassari, Italy
7. Newcastle Upon Tyne Hospitals NHS Foundation Trust, Newcastle upon Tyne, UK
8. Center for the Study of Movement, Cognition and Mobility, Neurological Institute, Tel Aviv Sourasky Medical Center, Tel Aviv, Israel
9. Instituto de Salud Global Barcelona, Barcelona, Spain
10. Dipartimento di Elettronica e Telecomunicazioni, Politecnico di Torino, Turin, Italy
11. PolitoBIOMed Lab – Biomedical Engineering Lab, Politecnico di Torino, Turin, Italy
12. Insight Centre for Data Analytics, O'Brien Science Centre, University College Dublin, Dublin, Ireland
13. UCD School of Public Health, Physiotherapy and Sports Science, University College Dublin, Dublin, Ireland
14. Department of Electrical, Electronic and Information Engineering «Guglielmo Marconi», University of Bologna, Bologna, Italy
15. Health Sciences and Technologies—Interdepartmental Center for Industrial Research (CIRI-SDV), University of Bologna, Bologna, Italy
16. Department of Sport, Exercise and Rehabilitation, Northumbria University Newcastle, Newcastle upon Tyne, UK
17. Department of Computer Science, The University of Sheffield, Sheffield, UK

18. Machine Learning and Data Analytics Lab, Department of Artificial Intelligence in Biomedical Engineering, Friedrich-Alexander-Universität Erlangen-Nürnberg, Erlangen, Germany
19. McRoberts BV, The Hague, Netherlands
20. Department of Neurology, University Medical Center Schleswig-Holstein Campus Kiel, Kiel, Germany
21. Department of Physical Therapy, Sackler Faculty of Medicine & Sagol School of Neuroscience, Tel Aviv University, Tel Aviv, Israel
22. Department of Neuromedicine and Movement Science, Norwegian University of Science and Technology, Trondheim, Norway
23. School of Computing, University of Newcastle upon Tyne, Newcastle upon Tyne, UK
24. Novartis Institutes of Biomedical Research, Novartis Pharma AG, Basel, Switzerland
25. Department of Neuroscience and Sheffield NIHR Translational Neuroscience BRC, Sheffield Teaching Hospitals NHS Foundation Trust, Sheffield, UK
26. Digital Health R&D, AstraZeneca, Sweden

### Keywords

Gait analysis; wearable sensors; activity monitoring; users evaluation; mobility outcomes

**Wordcount: 5092**

# 1 ABSTRACT

## Introduction

Existing mobility endpoints based on functional performance, physical assessments and patient self-reporting are insensitive and resource-intensive, limiting their utility in clinical practice. Wearable devices including inertial measurement units (IMUs) can overcome these limitations by quantifying digital mobility outcomes (DMOs) both during supervised structured assessments and in real-world conditions. The validity of IMU-based methods in the real-world, however, is still limited in patient populations. Rigorous validation procedures should cover the metrological verification of a chosen device, the validation of the algorithms for the DMOs computation specifically for the population of interest and in daily life situations, and the users' perspective on the device.

## Methods and analysis

This protocol was designed to establish the technical validity and patient acceptability of the approach used to quantify digital mobility in the real-world by Mobilise-D, an EU-funded IMI consortium aiming at fostering regulatory approval and clinical adoption of DMOs.

After defining the procedures for the metrological verification of an IMU based device, the experimental procedures for the validation of algorithms used to calculate the DMOs are presented. These procedures include the assessment of mobility both in the laboratory and in the real-world in 120 participants from five groups: healthy older adults; chronic obstructive pulmonary disease (COPD), Parkinson's disease (PD), multiple sclerosis (MS), proximal femoral fracture (PFF), and congestive heart failure (CHF). DMOs extracted from the monitoring device will be compared to those obtained from different validated reference systems, chosen according to the different contexts of observation. Questionnaires and interviews will evaluate the users' perspective on the deployed technology and on the relevance of the assessment of mobility.

## Ethics and Dissemination

The study, registered at ISRCTN (12246987), has already been granted ethics approval by local committees of the involved centres. The data and algorithms used as part of this study will be made publicly available.

## Strengths and limitations of this study

- A multi-disciplinary approach was implemented to define a protocol for the validation of tools for mobility monitoring, covering aspects related to devices, algorithms and users.
- A set of rigorous quality insurance procedures have been established to allow for the creation of a high-quality annotated dataset to foster development in the field of digital mobility monitoring.



- Mobility data will be collected in the laboratory and in the real-world for five different cohorts of slow-walkers. and subsequently will be made publicly available at the end of the study
- The multi-stage and multi-device experimental procedures required by this validation study can be extremely challenging for the both the participants and the assessors.
- For the laboratory acquisitions, the level of agreement between the gold standard and the inertial sensor devices might be affected by the limitations associated to a restricted capture volume.

## 2 INTRODUCTION

The ability to move is a key contributor to physical, mental and social well-being, which is in line with the World Health Organizations' (WHO's) definition of health. [1] However, the study of mobility has received relatively little attention, except for diseases characterised by specific mobility dysfunction. The increasing longevity of the world's population together with prolonged survival of many patients with long term conditions means that more people are suffering from loss of mobility, which in turn is a major determinant of loss of independence. [2,3] This has a considerable and growing personal, societal and economic impact. Efforts to mitigate this loss of mobility are an increasing priority and promising interventions are now under investigation. Existing mobility endpoints based on performance, patient self-reporting and one-off assessment are resource-intensive and lack sensitivity, [4] which limits therapeutic development and clinical management. A novel approach is needed that is low cost, simple, accurate and that can be used in the real world, including the home and the community. Poor gait, especially slow walking, is a key determinant of mobility loss. It is associated with greater mortality, morbidity, cognitive decline, dementia and fall risk. [2,3] Quantifying gait related mobility outcomes, including features such as such as step/stride duration and their variability, walking speed and asymmetry features is well established in supervised instrumented assessments. Wearable devices including inertial measurement units (IMUs) that allow digital mobility outcomes (DMOs) to be described, are leading the transition from laboratory-based assessment of mobility (mobility capacity), to continuous, unsupervised monitoring of mobility in daily life conditions (mobility performance). Nonetheless, the validity of IMU-based methods to characterise real-world mobility, and gait in particular, is still limited, especially in populations suffering from pathological conditions. This is because measuring real-world gait is far from simple or straightforward. In addition, complex factors arise from multiple sources that influence outcome measures, including disease characteristics, patient specific habits, environment/context and the purpose of walking. All these factors limit the validity of existing algorithms developed to quantify targeted DMOs. [5] Additionally, validation should include simultaneous evaluation [6] of the participants perception and acceptability of the device [7] as well as aspects related to wearability and usability. [7,8] Finally, a separate assessment of the metrological performance of the sensors contained in the adopted device is required. All these validation steps need

1  
2  
3 to be taken before the DMOs and the associated technologies can be effectively used for clinical [4]  
4 and regulatory [10] purposes (see Figure 1 for summary).  
5  
6  
7

8 [Figure 1 around here]  
9

10  
11 In this paper, we present the comprehensive, multi-stage protocol deployed in the technical validation  
12 study (TVS) that we have developed as part of the IMI2-JU-funded Mobilise-D project (Number  
13 820820 [11]), that aims to validate a new digital method for remote monitoring of mobility. In  
14 particular, this technical validation study aims to describe the multi-stage protocol to: a) verify the  
15 metrological performance of the sensors included in a IMU based monitoring device, using a procedure  
16 that could be replicated on any device; b) establish the validity and reliability [12] of the DMOs  
17 estimated by the algorithms using data from an IMU based device, taking into accounts the effects of  
18 populations (e.g., healthy adults, patients with various conditions), locomotor activities (simple straight  
19 walking versus complex walking tasks), contexts (lab based versus real-world), durations (device  
20 wearing time, DMOs hourly and daily fluctuations, etc.), and contextual confounding factors (such as  
21 location of walks, weather, use of walking aids, etc.); and, c) establish participants' and assessors'  
22 opinions on the usability and acceptability of the monitoring devices that will be deployed.  
23  
24  
25  
26  
27  
28  
29  
30

### 32 **3 METHODS**

33  
34 The monitoring device that will be used in this study to collect mobility data is the DynaPort MM+  
35 IMU (McRoberts, Table 1). In a trade-off between usability, accuracy and ability to provide DMOs for  
36 both at step and stride level, this is attached to the lower back via an elastic waistband and Velcro strap.  
37 The validity of algorithms to accurately estimate DMOs in the real-world will be investigated in 120  
38 participants including: healthy older adults (HA) and in five clinical cohorts (chronic obstructive  
39 pulmonary disease, COPD; Parkinson's disease, PD; multiple sclerosis, MS; proximal femoral fracture,  
40 PFF; and congestive heart failure, CHF), chosen as presenting a variety of gait and mobility features.  
41 [4] The usability and acceptability of the device from the perspective of the participants and the  
42 assessors involved in the study will be established via interviews and questionnaires.  
43  
44  
45  
46  
47  
48  
49

#### 50 **3.1 Verification of the metrological performances of the device**

51 Verifying the performance of a device needs a robust and comprehensive metrological characterisation  
52 of all the sensors that it embeds. This requires a series of standardised procedures (spot-checks) to be  
53 implemented to ensure accuracy of raw data that will be used as input to the algorithms. Table 1 shows  
54 the sensing characteristics of the device used in this study.  
55  
56  
57  
58  
59  
60

**Table 1** Characteristics of the sensors included in the DynaPort MM+ device

| Sensor                  | Sampling Frequency | Sensor Range   | Sensor resolution           |
|-------------------------|--------------------|----------------|-----------------------------|
| Tri-axial accelerometer | 100 Hz             | $\pm 8g$       | 1 mg (at $\pm 8g$ )         |
| Tri-axial gyroscope     | 100 Hz             | $\pm 2000$ dps | 70 mdps (at $\pm 2000$ dps) |
| Barometer               | 1 Hz               | 300-1100 hPa   | 0.01 hPa                    |
| Temperature sensor      | 1 Hz               | $^{\circ}C$    | 0.1 $^{\circ}C$             |

According to Institute of Electrical and Electronics Engineers *Standard for Sensor Performance Parameter Definitions* ((IEEE 2700-2017 [13]) a number of parameters are needed to characterise the metrological performance of the accelerometer, gyroscope, and magnetometer included in an IMU. These parameters can be computed under both static and dynamic conditions. The main noise parameters used are the first (mean value) and second (variance) order statistics, and the root Allan variance parameters of noise. [14,15] The parameters related to the first and second order statistics of noise can also be estimated by means of a short static acquisition (the minimum length of each acquisition is defined by IEEE standard for each sensor). These short static acquisitions can be simply performed using a plastic cube, where the device can be properly secured and then each of the three sensors' coordinate axes x, y and z are in turn aligned with the direction of gravity (g) as well as its opposite direction (six combinations, Figure 2). The root Allan variance parameters are instead computed over a long static acquisition. [16] Typically, the acquisitions are performed over a period of 4-8 hours. [14,15] All the static acquisitions should be carried out at a constant temperature of 25 $^{\circ}C$ . In comparison to a static acquisition, characterising the dynamic metrological performance of the sensors embedded in an IMU is less straightforward, since the metrological standards provided by IEEE describe a sequence of operations requiring an expensive and complex testing instrumentation. However, various alternatives have been proposed in the literature. The accuracy of a gyroscope can be quantified during a single-axis rotation by a known angle by computing the ideal angular velocity and comparing it to the average measured angular velocity. [17,18] This procedure should be performed using a rotation plate with a rotating speed comparable to what is encountered during human gait ( $\sim 200$  deg/s) (Figure 2).

[Figure 2 around here]

The tests described above will be performed on thirty-five different DynaPort devices deployed in the study. This will allow conformity with manufacturer indications to be verified, highlight the need for sensor recalibrations and provide benchmark standards for any device with equivalent sensing capacity. In turn, this will allow any device with an equivalent or superior solution to be used, in order to facilitate broader adoption of validated algorithms and cope with a continuously changing hardware landscape.

## 3.2 Protocol for Validation of the algorithms

Several algorithms to detect the DMOs from a single device have been implemented according to agreed definitions [19] and based on existing literature. At this time, these algorithms are being concurrently validated using the approach described by Bonci et al. [6] using pre-existing datasets, which mostly include lab-based observations only. Following this selection process, the best performing algorithms will be assessed using the data captured with the protocol here described.

### 3.2.1 Participants

This multi-centre study is sponsored and coordinated by The Newcastle upon Tyne Hospitals NHS Foundation Trust, UK. Participants will be recruited in five sites across Europe : Tel Aviv Sourasky Medical Center, Israel (ethics approval granted by the Helsinki Committee, Tel Aviv Sourasky Medical Center, Tel Aviv, Israel, 0551-19TLV), Robert Bosch Foundation for Medical Research, Germany (ethics approval granted by the ethical committee of the medical faculty of The University of Tübingen, 647/2019BO2), University of Kiel, Germany (ethics approval granted by the ethical committee of the medical faculty of Kiel University, D438/18), The Newcastle upon Tyne Hospitals NHS Foundation Trust, UK and Sheffield Teaching Hospitals NHS Foundation Trust, UK (ethics approval granted by London – Bloomsbury Research Ethics committee, 19/LO/1507).

**Table 2** Inclusion and exclusion criteria adopted for the different disease cohorts

| Group      | Inclusion criteria                                                                                                                                                                                                                                                                                                                                                                                                                                                          | Exclusion criteria                                                                                                                                                                                                                                                                                                                                                                                                             |
|------------|-----------------------------------------------------------------------------------------------------------------------------------------------------------------------------------------------------------------------------------------------------------------------------------------------------------------------------------------------------------------------------------------------------------------------------------------------------------------------------|--------------------------------------------------------------------------------------------------------------------------------------------------------------------------------------------------------------------------------------------------------------------------------------------------------------------------------------------------------------------------------------------------------------------------------|
| All groups | <ul style="list-style-type: none"> <li>-able to walk 4 meters independently with or without walking aids</li> <li>-able to give informed consent</li> <li>-willingness to wear the sensor set-ups during the study</li> <li>-shoe size 36 (3 UK) or above</li> <li>-able to read and write in first language of the respective country</li> <li>-Montreal Cognitive Assessment (MoCA) &gt;15 [20]</li> <li>-available for home /office visit during study period</li> </ul> | <ul style="list-style-type: none"> <li>-occurrence of any of the following 3 months prior to inclusion: myocardial infarction, hospitalization for unstable angina, stroke, coronary artery bypass graft (CABG), percutaneous coronary intervention (PCI), implantation of a cardiac resynchronization therapy device (CRTD)</li> <li>-current medical condition that could interfere with the patient's compliance</li> </ul> |
| COPD       | <ul style="list-style-type: none"> <li>-≥45 years of age</li> <li>-Diagnosis of COPD (post-bronchodilator forced expiratory volume in the first second (FEV<sub>1</sub>) to forced vital capacity (FVC) ratio &lt;0.70)</li> <li>-clinical stability, defined as at least 4 weeks without antibiotics and/or oral corticosteroids to treat either a moderate or severe exacerbation</li> <li>-non-smokers, current or ex-smokers with a</li> </ul>                          | <ul style="list-style-type: none"> <li>-having undergone major lung surgery (e.g. lung volume reduction, lung transplant)</li> <li>-having a lung tumor</li> <li>-primary respiratory diseases other than COPD (e.g. asthma)</li> <li>-impaired mobility related to non-COPD causes, as judged by the investigator</li> </ul>                                                                                                  |

|     |                                                                                                                                                                                                                               |                                                                                                             |
|-----|-------------------------------------------------------------------------------------------------------------------------------------------------------------------------------------------------------------------------------|-------------------------------------------------------------------------------------------------------------|
|     | smoking history equivalent to at least 10 pack years (1 pack year = 20 cigarettes smoked per day for 1 year)                                                                                                                  |                                                                                                             |
| PD  | -aged 18+ years<br>-Diagnosis of PD according to the Movement Disorders Society criteria [21]                                                                                                                                 | -impaired mobility related to non-PD causes, as judged by the investigator                                  |
| MS  | -aged 18+ years<br>-Diagnosis of MS based on the revised McDonald's criteria                                                                                                                                                  | -impaired mobility related to non-MS causes, as judged by the investigator                                  |
| PFF | -65+ years of age<br>-surgical treatment (fixation or arthroplasty) for a low-energy fracture of the proximal femur (ICD-10 diagnosis S72.0, S72.1, S72.2) as diagnosed on X-rays of the hip and pelvis within last 12 months | -impaired mobility related to non-PFF causes, as judged by the investigator                                 |
| CHF | -≥45 years of age<br>-Diagnosis of chronic heart failure NYHA class II-IV                                                                                                                                                     | - history of COPD ≥GOLD III<br>- impaired mobility related to non-CHF causes, as judged by the investigator |
| HA  | 65+ years of age                                                                                                                                                                                                              |                                                                                                             |

A convenience sample of 120 participants will be recruited via their clinical care team or research registers to represent the five disease cohorts (COPD, PD, MS, PFF, and CHF), as well as healthy older adults (HA). Twenty participants will be recruited for each cohort. Each cohort will be recruited across multiple sites to ensure generalizability (e.g. differing cultures and contexts). Inclusion and exclusion criteria, grouped by total cohort and disease cohort, are summarized in Table 2. The sample size of 120 has been defined according to Consensus-based Standards for the selection of health Measurement Instruments guidelines for measurement properties (COSMIN [22]). This sample size allows for 'excellent' methodological quality of non-inferiority studies, and is the one endorsed by the COSMIN checklist, a standardized tool for assessing the methodological quality of studies on measurement properties. [23]

All participants will give written informed consent prior to undergoing a clinic/laboratory-based session to record generic and disease-specific characterisations. This will include participant reported outcomes, assessments and medical notes review. The generic and cohort-specific clinical outcomes that will be collected are summarised in Table 3.

**Table 3** Generic and cohort-specific clinical outcomes.

| Cohort | Generic Outcomes                                                                                                                                                                                                                                                                                                                                                                                                                                                                                                                                                                                                                                                                         |
|--------|------------------------------------------------------------------------------------------------------------------------------------------------------------------------------------------------------------------------------------------------------------------------------------------------------------------------------------------------------------------------------------------------------------------------------------------------------------------------------------------------------------------------------------------------------------------------------------------------------------------------------------------------------------------------------------------|
| All    | <ul style="list-style-type: none"> <li>- Descriptive measures (age, sex, living arrangements, education)</li> <li>- Anthropometric measures (height, mass, shoe size, waist circumference)</li> <li>- Health status (comorbidities, number of falls and injuries in the 12 months prior to assessment, walking aid usage and current medication)</li> <li>- Montreal Cognitive Assessment to evaluate global cognition [20]</li> <li>- Visual Analogue Scale to measure pain during walking (0-10, from no pain to worse pain possible)</li> <li>- Function component of the Late-Life Function and Disability Instrument (LLFDI) to evaluate function and disability [24,25]</li> </ul> |
| Cohort | Cohort-specific clinical outcomes                                                                                                                                                                                                                                                                                                                                                                                                                                                                                                                                                                                                                                                        |
| PD     | <ul style="list-style-type: none"> <li>- Movement Disorder Society (MDS)-sponsored revision of the Unified Parkinson's Disease (PD) Rating Scale (UPDRS), motor part [26]</li> </ul>                                                                                                                                                                                                                                                                                                                                                                                                                                                                                                     |
| MS     | <ul style="list-style-type: none"> <li>- Expanded Disability Status Scale (EDSS)* [27]</li> </ul>                                                                                                                                                                                                                                                                                                                                                                                                                                                                                                                                                                                        |
| COPD   | <ul style="list-style-type: none"> <li>- 6-minute walk test</li> <li>- Recent spirometry test obtained from medical notes to characterise lung function*</li> <li>- COPD Assessment Test™ (CAT) [28]</li> </ul>                                                                                                                                                                                                                                                                                                                                                                                                                                                                          |
| PFF    | <ul style="list-style-type: none"> <li>- Short Physical Performance Battery (SPPB) – quiet standing balance task, a five times chair-raise test, and a 4m walk test at preferred gait speed</li> </ul>                                                                                                                                                                                                                                                                                                                                                                                                                                                                                   |
| CHF    | <ul style="list-style-type: none"> <li>- 6-minute walk test</li> <li>- Kansas City Cardiomyopathy Questionnaire (KCCQ) * [29]</li> </ul>                                                                                                                                                                                                                                                                                                                                                                                                                                                                                                                                                 |

\* denotes measures obtained from medical records if completed within 6 months prior to assessment

Data collection started across the above five sites in August 2020 and will continue till July 2021. All experimental procedures are constantly monitored and revised as needed to ensure full compliance with COVID19-related health and safety measures and for safeguarding of both the study participants and the assessors. The data collected as part of this protocol will be made publicly available together with the algorithms used to process the data.

### 3.2.2 Patient and Public Involvement

Patient and Public involvement and engagement (PPIE) has informed the design and conduct of this study. The protocol and patient facing documents were reviewed and changes implemented based upon reviewer feedback. We will work with our Patient Advisory Group (with members representing the patient cohorts involved in the study) to review study findings, data interpretation and, study reporting and dissemination, including co-design and presentation of dissemination materials for patients and the public. The learnings derived from these activities will further inform the work of the wider Mobilise-D project.

### 3.2.3 Experimental protocol

Performance of algorithms to determine walking-related DMOs is mostly affected by three factors:

(i) the type of motor task (e.g., slow as opposed to fast, straight as opposed to curvilinear or inclined walking, etc.), (ii) the population of interest (e.g., healthy vs pathological gait), (iii) the context of observation (e.g., home vs outdoors). To accommodate these factors, we have developed a comprehensive, multi-stage protocol that includes a variety of tests conducted both in a laboratory context and in the real world (Table 4).

**Table 4** Summary of the experimental protocol used for the validation of the algorithms in the laboratory and in the real world. INDIP= INertial module with DIstance Sensors and Pressure insoles.

| Context of assessment  | Reference Systems                                 | Tested device         | Mobility Tasks                                                     |
|------------------------|---------------------------------------------------|-----------------------|--------------------------------------------------------------------|
| Laboratory             | Stereophotogrammetry                              | DynaPort MM+<br>INDIP | Structured mobility tasks and daily living activities              |
| Real world (2.5 hours) | INDIP<br><br>Mobile Phone with Aequora App Beacon | DynaPort MM+          | Unsupervised real-world activities (including predetermined tasks) |
| Real world (7 days)    | Mobile Phone with Aequora App Beacon              | DynaPort MM+          | Unsupervised daily living                                          |

### Laboratory based assessment

Laboratory-based observations will be used to quantify validity and consistency within and between groups and different types of walking tasks under controlled ideal conditions. Structured and task-based mobility activities and a simulated daily activity session, mimicking habitual movements performed at home or at work will be included. The outcome of this comparison will provide the level of highest expected accuracy and minimum detectable changes for a given DMO.

#### *Measurement tools*

##### *Reference system*

A stereophotogrammetric (SP) system (100Hz) will be used as the gold standard in structured and simulated tests of daily activities to validate the DMOs calculated from the DynaPort raw data. A bespoke marker set will include four markers on each foot for detecting the gait events and four markers on the lower back device to track the displacement of the DynaPort device (Figure 3).

[Figure 3 around here]

To ensure quality and consistency in the SP data collection, accommodating different SP systems across sites, a spot check designed following the methodology proposed by Di Marco et al. [30] will be used, which will establish each system specific level of accuracy. A graphical user interface (GUI) for automated pre-processing of the SP data will ensure consistency in associated procedures (labelling, gap filling, etc.).

#### *Tested devices*

During this observation each participant will also be equipped with an additional multi-sensor system (INertial module with DIstance Sensors and Pressure insoles, INDIP) [31–33] and with the Dynaport device. The INDIP system (Figure 4) includes four inertial modules (one on the lower back, one on the non-dominant wrist and two on the feet), two distance sensors and two force-sensitive resistor pressure insoles including 16 force-resistive sensing elements (manufacturer 221e S.r.l., Italy). The INDIP has been designed to be used as a reference for real-world experiments, and in this phase of the protocol its performance will be validated against the SP system for the populations of interest. To this purpose, spatio-temporal parameters will be estimated exploiting the sensors redundancy and implementing previously validated sensor fusion algorithms. In particular, gait events will be detected using data from pressure insoles and inertial sensors separately and, then, combined for increasing robustness and detection accuracy (missed and extra events minimization). Secondly, spatial variables will be computed starting from feet inertial data using a Madgwick filter [34,35] combined with a zero-velocity update [36,37] and then calculating velocity and displacement using a direct and reverse approach. [38–41] Preliminary results from in-lab validation showed percentage errors of about 2% for gait speed as estimated during continuous walking, including both straight and curvilinear portions. [42]

[Figure 4 around here]

The lower back INDIP unit and the DynaPort will be rigidly attached to each other. The data from the SP (100Hz), INDIP (IMU and insoles, 100Hz, Distance sensor, 50Hz) and DynaPort (100Hz) systems will be synchronised using a hardware-based approach for the SP and the INDIP system, and timestamps to align recordings from the INDIP and the DynaPort.

#### *Mobility tasks*

##### *Structured Mobility Tasks*

*Straight Walking:* Straight walking is the most common test of walking. [43,44] The participant walks for a distance of 5m from a standing start and will be repeated at three different walking speeds: preferred, fast and slow (Figure 5 B).

*Timed Up and Go (TUG):* The TUG is a widely used clinical assessment of a person's mobility. [45] The participant is asked to sit in a chair, stand up, walk 3 m in a straight line, make a 180° turn, walk back to the chair, turn and sit down (Figure 5 A).



1  
2  
3 *L Test:* The participant is asked to sit in a chair, stand up, walk straight, turn 90° to the left around a  
4 cone, walk straight to the second cone, make a 180° turn to the left, walk straight before making a final  
5 90° turn to the right and return to the chair to sit down (Figure 5 C). Besides being a clinically validated  
6 test, [46] the main purpose of including this test is the variation in curvilinear walking and the inclusion  
7 of different types of turns.  
8

9  
10  
11 *Surface Test:* The participant walks around a defined circuit by turning around the cones (Figure 5 D).  
12 The circuit is completed twice, creating the longest walking bout out of all the tasks (approx. 20m).  
13

14 *Hallway Test:* The participant walks along a 6m walkway stepping up and down a step positioned in  
15 the walkway. At the end of the walkway, the participant will complete a sharp 180° turn and walk back  
16 along the walkway (again stepping up and down off the step) until reaching the end point of the test  
17 (Figure 5 E).  
18

19 Use of arm rests for the TUG and L-test and hand rails for the hallway test is permitted when needed.  
20  
21

22  
23  
24 [Figure 5 around here]  
25

### 26 27 *Daily living activities*

28 These lab-based tasks will be used to simulate daily activities expected in the real life, similar to  
29 previous studies. [47] The participant starts by sitting in chair one and then executes a series of daily  
30 living tasks while sitting and moving around the room (see Figure 5F).  
31  
32

## 33 34 35 **Real - world validation (2.5 hours observation)**

36 This phase of the protocol will quantify validity and consistency across individuals and different types  
37 of walking tasks in the real world. It will be performed in a habitual environment  
38 (home/work/community) chosen by the participants. The duration of the observation has been  
39 established as trade-off between experimental, clinical and technical requirements.  
40  
41  
42  
43

### 44 45 Measurement tools

#### 46 47 *Reference systems*

48 Participants will be asked to wear the INDIP, which in this phase of the protocol will be used as a  
49 reference system for the quantification of the DMOs provided by the single sensor algorithms, as  
50 applied to the DynaPort device data.  
51

52 In order to quantify the effects of contextual confounding factors, the participants will also be provided  
53 with a system detecting outdoors walking, gradient of descent/ascent (walking uphill/downhill). The  
54 system is developed as a mobile Android application (Aeqora app) and the device selected was a  
55 Samsung S9 with Android 10. The app is composed of three parts: (i) the core tracker, (ii) the interface  
56 and (iii) the server infrastructure collecting data across users. The core tracker, adapted from a library  
57  
58  
59  
60

1  
2  
3 developed by the University of Sheffield, [48] utilises the mobile phone's internal sensors to compute  
4 the type of activity (e.g. walking) and intensity (e.g. cadence) to identify geo-located bouts of  
5 movement. It operates in the background and senses mobility features through a range of sensors (e.g.  
6 step counters, activity recognition, accelerometer, gyroscope, etc.) as well as from location services  
7 (GPS, network, Bluetooth, etc.). It collects the data and stores the raw sensor data into a local database  
8 in real time. A set of mechanisms have been developed to control access to this data, keep it secure,  
9 and regulate its use. First, no user identity information is sent within a single request as a token identifier  
10 is used. Additionally, a security layer is built based on Secure Socket Layer (SSL) and Transport Layer  
11 Security (TLS) 3.0 protocol to the data with scalable and efficient encryption algorithms. An SSL/TLS  
12 certificate is issued and used to establish identity and trust between server and client apps (desktop and  
13 mobile), ensuring privacy and security whenever communicating sensitive data.

14  
15 Data collected during the experiments will be sent to a cluster of servers that uses algorithms to integrate  
16 the phone's data with contextual information about the locations where the participant will walk: where  
17 possible walks will be matched to OpenStreetMap [49] roads and paths, to remove GPS noise, the slope  
18 variation of each walk is computed on tiles, with a resolution of 5m within the UK (using Ordnance  
19 Survey Terrain 5) [50] and 30m in the other locations (using NASA's Shuttle Radar Topography  
20 Mission (SRTM) data [51], indoors and outdoors walking is recognised. Moreover, weather is  
21 associated with participant location based on the most proximate weather station.

22  
23 The use of walking aids will also be monitored in this phase. For this purpose, a Bluetooth beacon  
24 (BlueBeacon Tag, BlueUp) will be attached to the walking aid and its activity will be detected by the  
25 phone's mobile tracker and saved by the app. The distance between the phone and the Beacon and data  
26 from the accelerometer contained in the Beacon will be integrated to determine when the aid is in use.

### 27 Mobility Tasks

28 To capture the largest possible range of activities during this assessment, participants will be guided  
29 by the following list of activities to be included: rise from a chair and walk to another room; walk to  
30 the kitchen and make a drink; walk up and down a set of stairs (if possible); walk outdoors (if possible,  
31 for a minimum of two minutes); if walking outside, walk up and down an inclined path. No supervision  
32 or structure to how these tasks should be completed will be given to the participants.

### 33 **Real - world validation: seven days monitoring**

34 This observation will quantify the effects of device wearing time, hourly and daily fluctuations of  
35 DMO's, and contextual confounding factors (such as location of the walk, weather, type of housing,  
36 etc.).

### 37 Measurement tools

38 The participants will be asked to wear the DynaPort, and to carry a mobile phone equipped with the  
39 Aequora App. Bluetooth beacons will also be used to track the use of walking aids.

### *Mobility Tasks*

Participants will be monitored continuously for seven days, without any specific instruction being provided, except for that of wearing the provided measurement tools.

### **3.3 Assessment of participants' and assessors' experience**

This part of the study will evaluate the participants' and assessors' experience of using the monitoring device. For the participant's assessment, wear-time of the device during the 7 days monitoring will be collected as a primary measure of compliance. Following the period of the seven-day, free-living data collection, participants will complete two questionnaires to assess the acceptability of the device. The first is a 12-item questionnaire [52] investigating usability on a 5-point ordinal scale. The questions are simple and focus on the impact of using a wearable device on participants' feelings, comfort and the ease of use of the device. The second questionnaire is the Comfort Rating Scale, [53] a 6-item measure investigating the comfort of a wearable device on a 21-point ordinal scale from '0 – low agreement' to '20 – high agreement'.

A subset of participants from all recruiting sites and cohorts will complete a semi-structured interview. For this qualitative part of the study, sampling will continue until saturation, i.e. until no additional learning is identified from the data. The interview will explore participants' opinions on the use of wearable devices and digital technology in healthcare, experiences of managing their condition, experiences of technology, and opinions on data privacy associated with the use of technology in healthcare. Additionally, participants will be asked about their experiences of using the device, including comfort perceived usefulness and ease of use, barriers and facilitators, and any other usability experiences that they may have encountered. All interviews will be audio-recorded, transcribed verbatim and, where required, translated to English.

To assess the professionals' experience, assessors from each of the clinical sites will be asked to assess the usability of the device after completion of the data collection. They will be provided with three questionnaires: 1) The System Usability Scale [54] a commonly used, validated 10-item questionnaire that asks users to rate a device on a 5-point Likert scale from '1 strongly disagree' to '5 – strongly agree'. Questions focus on the ease of use of the device, and the integration of various functions within it; 2) The IBM Computer System Usability Questionnaire [55] (to assess the DynaPort software), is composed of 19 items and asks respondents to consider their interaction with a computer system on a 7-point Likert scale from the perspective of data collection; 3) A bespoke questionnaire designed specifically for the TVS to assess the acceptability and effectiveness of the training methods, procedures, and any other materials provided within the study. The questionnaire will ask respondents to rate their experiences on a 7-point Likert scale to determine whether any changes to the procedures and materials are required, and whether training was effective in preparing researchers to implement the assessment protocol as planned.

1  
2  
3 In addition, assessors will complete a semi-structured interview with the aim of exploring their  
4 experiences of the data collection process. Assessors will be asked about the use of the device (e.g.,  
5 ease of use, intuitiveness, data collection and download procedures, etc.), training and materials  
6 provided prior to the commencement of the study, and barriers and facilitators to using the device. The  
7 topic guide and open-ended questions allow for new areas of conversation to emerge. All interviews  
8 will be audio-recorded and transcribed verbatim.  
9  
10  
11  
12

### 13 **3.4 Data management**

14 All data will be uploaded to a central platform "e-Science Central" [56] which provides data processing  
15 and storage functionality in accordance with principles of reproducible research. The underlying  
16 infrastructure complies with ISO 27000 standards for Information Security Management Systems and  
17 is hosted on Amazon Web Service secure services cloud platform. Data will be integrated on the  
18 platform by means of implementation of a standardised file nomenclature system. At point of capture,  
19 each file will be labelled in standardised format. For source data, we will adhere to principles defined  
20 by the US Food and Drug Administration [57] for making them attributable, legible, contemporaneous,  
21 original, and accurate (ALCOA+).  
22  
23  
24  
25  
26  
27  
28

### 29 **3.5 Data analysis plan**

#### 30 **3.5.1 Verification of the device**

31 Mean and standard deviation readings of the accelerometer, gyroscope, and magnetometer signals  
32 captured during static acquisition will be used to assess the reliability of the manufacturer sensor  
33 calibration and to detect the presence of abnormal spikes in the sensor signals. Data from long static  
34 acquisitions will be used to confirm the stability of sampling frequency, the duration of the battery, and  
35 to estimate the Allan deviation (bias instability) of the gyroscope readings over time. Errors of  
36 gyroscope readings will be assessed using mean and standard deviation of nominal, measured and  
37 relevant errors for angular velocity values during the dynamic acquisitions.  
38  
39  
40  
41  
42  
43  
44  
45

#### 46 **3.5.2 Validation of the algorithms**

47 The data analysis will determine criterion validity (including selected criterion (concurrent) validity and  
48 reliability metrics) of the primary and secondary DMOs listed in Table 5. Table 6 summarises the  
49 statistical tools that will be used to quantify each of the DMOs. All statistical analyses will be performed  
50 using the statistical analysis toolbox of Matlab R2018a. Continuous variables (e.g. cadence, real-  
51 walking-speed) will be summarized with descriptive statistics for the values obtained within walking  
52 bouts (mean and standard deviation). In addition, the mean, minimum, maximum, standard deviation,  
53 median, interquartile range (IQR) and Root Mean Square Error (RMSE) of DMOs over all available  
54 walking bouts will be presented. Categorical variables (e.g. laterality of initial contacts) will be  
55  
56  
57  
58  
59  
60

summarized with frequency counts and percentages. Confidence Interval 95% (CI) will be provided for the Interclass Correlation Coefficients (ICC).

For specific DMOs (e.g. events, etc.), True Positives (TP), False Positives (FP), True Negatives (TN) and False Negatives (FN) will be identified and used to calculate the following performance metrics:

$$\text{Sensitivity} = \frac{TP}{TP + FN},$$

$$\text{Positive Predicted Value} = \frac{TP}{TP + FP},$$

$$\text{Accuracy} = \frac{TP + TN}{TP + TN + FP + FN},$$

$$\text{Specificity} = \frac{TN}{TN + FP} \text{ and}$$

$$\text{F1 - score} = 2 * \frac{\text{Positive Predicted Value} * \text{Sensitivity}}{\text{Positive Predicted Value} + \text{Sensitivity}}$$

Criterion validity will be characterised by evaluating the absolute and relative differences (error) between the DMOs quantified with the single device and those derived from the reference systems. Then, the mean, standard deviation and maximum of all absolute errors will be reported for each walking bout. Limits of agreement between single sensor and reference system DMOs will be quantified. In addition, statistically significant differences between single sensor and reference system DMOs will be evaluated via parametric (t-test) or non-parametric (Wilcoxon signed-rank test) tests, depending on the distribution of the data.

Concurrent validity between the DMOs quantified by the single device and those derived from the reference systems will be evaluated by quantifying the Intraclass Correlation Coefficient (ICC(2,1)).

All results will be presented separately by cohort (e.g. PD) and subgroup (i.e., subgroups of the cohorts) stratified by average stride gait speed (e.g. fast speed: walking speed > 1 m/s, medium speed: walking speed between 0.5m/s and 1 m/s, slow speed: walking speed < 0.5 m/s) [2].

**Table 5** List of primary and secondary DMOs that will be analysed as part of the TVS.

| Variables                                                                                                                                                                                                     | DMOs (units)          | Definition                                                                             |
|---------------------------------------------------------------------------------------------------------------------------------------------------------------------------------------------------------------|-----------------------|----------------------------------------------------------------------------------------|
| Walking Bout (WB)<br><i>A walking sequence containing at least two consecutive strides of both feet. Start and end of a WB are determined by a resting period or any other activity (non-walking period).</i> | Number of WBs (count) | Based on the identification of gait as an activity (yes/no) to a sample level of 0.1 s |
|                                                                                                                                                                                                               | WB Start (s)          | Start of WB                                                                            |
|                                                                                                                                                                                                               | WB End (s)            | End of WB                                                                              |
|                                                                                                                                                                                                               | WB Duration (s)       | Time between start and the end of WB                                                   |
| Stride/ Step Duration (SD)<br><i>Refers to the duration (time intervals) of strides, calculated as the time in between two non-consecutive (alternate) initial contacts.</i>                                  | Stride Duration (s)   | Duration between two non-consecutive (alternate) initial contact events                |
|                                                                                                                                                                                                               | Step Duration (s)     | Duration between two consecutive initial contact events                                |

|                                         |                                                                                                                        |                                                                                                                                                       |
|-----------------------------------------|------------------------------------------------------------------------------------------------------------------------|-------------------------------------------------------------------------------------------------------------------------------------------------------|
| Cadence (CE)                            | Cadence (steps/minute)                                                                                                 | Steps performed within a minute                                                                                                                       |
| Stride Length (SL)                      | Mean Stride Length (m)                                                                                                 | Average stride length within a WB                                                                                                                     |
| <i>Real-World - Walking-Speed (RWS)</i> | Gait speed (m/s)                                                                                                       | Velocity, ratio between displacement covered within a WB and time to cover it                                                                         |
| Turning                                 | Number of Turns                                                                                                        | Based on the identification of turns (yes/no) to a sample level of 0.1 s                                                                              |
|                                         | Turn Start (s)                                                                                                         | Start of each turn within the WB                                                                                                                      |
|                                         | Turn End (s)                                                                                                           | End of each turn within the WB                                                                                                                        |
|                                         | Turn Duration (s)                                                                                                      | Time between the start and the end of the turns within the WB                                                                                         |
|                                         | Maximal Turn Angle (deg)                                                                                               | Maximal angle achieved in the turn                                                                                                                    |
| Height Estimation                       | Elevation Change (m)                                                                                                   | Difference between the minimal and maximal height or elevation for the complete walking bout detected                                                 |
| Left/Right Identification               | Laterality (label)                                                                                                     | Left or Right category, indicating the foot with which the initial contact is performed                                                               |
|                                         | Number of Final Contact Events (counts)                                                                                | Correct identification of Final Contact events                                                                                                        |
|                                         | Final Contact Event (s)                                                                                                | Instant of time at which each final contact event is performed within a walking bout                                                                  |
|                                         | Swing Phase Duration (s)                                                                                               | Time between the last contact of the current footfall and the first contact of the next footfall on the same foot                                     |
| Secondary Outcomes (SO)                 | Stance Phase Duration (s)                                                                                              | Time in between the first contact and the last contact of two consecutive footfalls on the same foot                                                  |
|                                         | Variability of: Step Time, Stride Time, Swing Time, Stance Time Stride Velocity Stride Length (same units as variable) | St. Dev. and Coefficient of Variation of step time, of stride time, of swing time, of stance time, of stride velocity and stride length within a WB   |
|                                         | Asymmetry of: Step Time, Stride Time, Swing Time, Stance Time (same units as variable)                                 | Asymmetry evaluated as difference between right and left steps or strides for step time, of stride time, of swing time and of stance time within a WB |

**Table 6.** List of statistical analyses and performance metrics that will be used for the various DMOs. Performance metrics and criterion validity are those that will be used to compare DMOs obtained from a single device versus those obtained from the reference system. The types of plots listed in the table will be used to visualise performance metrics and to support interpretation of the results.

| DMO                     | PERFORMANCE METRIC |                           |          |             |          | CRITERION VALIDITY          |                   |                         |           |                     | PLOTS                  |                    |                    |                               |                 |
|-------------------------|--------------------|---------------------------|----------|-------------|----------|-----------------------------|-------------------|-------------------------|-----------|---------------------|------------------------|--------------------|--------------------|-------------------------------|-----------------|
|                         | Sensitivity        | Positive Predictive Value | Accuracy | Specificity | F1-score | Error (absolute & relative) | SD & Max of Error | Root Mean Squared Error | Precision | Concurrent validity | Significant Difference | Limit of Agreement | Bland Altman Plots | Scatter Plots for Correlation | Histogram Plots |
| Number of Walking Bouts | ✓                  | ✓                         | ✓        | ✓           | ✓        |                             |                   |                         |           |                     |                        |                    |                    |                               |                 |
| WB Start                |                    |                           |          |             |          | ✓                           | ✓                 | ✓                       | ✓         |                     |                        |                    | ✓                  | ✓                             | ✓               |
| WB End                  |                    |                           |          |             |          | ✓                           | ✓                 | ✓                       | ✓         |                     |                        |                    | ✓                  | ✓                             | ✓               |
| WB Duration             |                    |                           |          |             |          | ✓                           | ✓                 | ✓                       | ✓         | ✓                   | ✓                      | ✓                  | ✓                  | ✓                             | ✓               |
| Initial Contact Events  | ✓                  | ✓                         |          |             | ✓        | ✓                           |                   |                         |           |                     |                        |                    |                    |                               |                 |
| Step Duration           |                    |                           |          |             |          | ✓                           | ✓                 | ✓                       | ✓         | ✓                   | ✓                      | ✓                  | ✓                  | ✓                             | ✓               |
| Stride Duration         |                    |                           |          |             |          | ✓                           | ✓                 | ✓                       | ✓         | ✓                   | ✓                      | ✓                  | ✓                  | ✓                             | ✓               |
| Final Contact Events    | ✓                  | ✓                         |          |             | ✓        | ✓                           |                   |                         |           |                     |                        |                    |                    |                               |                 |
| Mean Stride Length      |                    |                           |          |             |          | ✓                           | ✓                 | ✓                       | ✓         | ✓                   | ✓                      | ✓                  | ✓                  | ✓                             | ✓               |
| Cadence                 |                    |                           |          |             |          | ✓                           | ✓                 | ✓                       | ✓         | ✓                   | ✓                      | ✓                  | ✓                  | ✓                             | ✓               |
| Elevation Change        |                    |                           |          |             |          | ✓                           | ✓                 | ✓                       | ✓         | ✓                   | ✓                      | ✓                  | ✓                  | ✓                             | ✓               |
| Walking Speed           |                    |                           |          |             |          | ✓                           | ✓                 | ✓                       | ✓         | ✓                   | ✓                      | ✓                  | ✓                  | ✓                             | ✓               |
| Number of Turns         | ✓                  | ✓                         | ✓        | ✓           | ✓        |                             |                   |                         |           |                     |                        |                    |                    |                               |                 |
| Turn Start              |                    |                           |          |             |          | ✓                           | ✓                 | ✓                       | ✓         |                     |                        |                    | ✓                  | ✓                             | ✓               |
| Turn End                |                    |                           |          |             |          | ✓                           | ✓                 | ✓                       | ✓         |                     |                        |                    | ✓                  | ✓                             | ✓               |
| Turn Duration           |                    |                           |          |             |          | ✓                           | ✓                 | ✓                       | ✓         | ✓                   | ✓                      | ✓                  | ✓                  | ✓                             | ✓               |
| Maximal Turn Angle      |                    |                           |          |             |          | ✓                           | ✓                 | ✓                       | ✓         | ✓                   | ✓                      | ✓                  | ✓                  | ✓                             | ✓               |
| Laterality              |                    |                           |          |             |          | ✓                           | ✓                 | ✓                       | ✓         | ✓                   |                        |                    |                    |                               |                 |
| Sequence Order          |                    |                           |          |             |          | ✓                           | ✓                 | ✓                       |           |                     |                        |                    |                    |                               |                 |

### 3.5.3 Participants' and assessors' experience

Participant and professional questionnaire data will be analysed using descriptive statistics. Interviews will be analysed using thematic analysis. [58] Transcripts will be deductively examined for the presence of themes related to the acceptability of the monitoring device to participants (i.e. comfort, interference with daily living) based on previous literature. Specifically, perceived usefulness, comfort, and ease of use are critical factors of usability thus, these will be the categories examined within the transcripts. Regarding participants use of technology to manage their healthcare condition an inductive approach will be taken. A list of codes relevant to the question will be generated and then refined by grouping them into potential themes.

## 4 CONCLUSIONS

The technical validation protocol provides the stakeholders, the first comprehensive, multi-modal solution to validate real-world mobility. The solution is based on a single device and covers all complementary aspects related to the device, algorithms to derive DMOs and the user perspective. Notably, the protocol described here has been accepted by the European Medical Agency,[59] as part of the Mobilise-D process for the regulatory qualification of real-world mobility performance biomarkers in Parkinson's disease. [10]

### Authors' contributions:

Manuscript initial drafting: CM, TB, SDD, AC, LA, AK, KS, SB, FC. Design and deployment of experimental tools and protocols: KS, LS, CM, TB, EB, FC, NI, BS, LV, IV, EH, NC, FS. AC, MC, SB, LRO, AY, CK, EA, LS, CB, WM, CH, EW, JHA, EG, MB; J, MN, KT, BV, JHE, AK, DS, AM. Data analysis and algorithm development: SDD, EA, HS, AS, BE, FK, AK, MU, AC, JG, SK, LC, LP, LR, HH, EG. Draft revisions: LRO, KA, BE, JHA, BV, HS, AM, JHO, PB, FK, BC, AK, LC, LP, EB, KS, SK, LP, HH, WM, NC, BS, AI, IN. Study design and coordination: CM, LRO, AM, SDD, AC. All authors have read and approved the final manuscript.

### Competing interests statement

Fabio Ciravegna is CEO and shareholder of Aeqora. Henrik Sillén is an employee of AstraZeneca. Bjoern M Eskofier is co-founder and owns shares of Portables HealthCare Technologies GmbH. McRoberts is the manufacturer of the DynaPort. Martijn Niessen, Jordi Evers, and Lucas Pluimgraaff are employees of McRoberts. Arne Mueller is an employee of Novartis and holds stock in Novartis. Lars Schwickert and Clemens Becker are consultants of Philipps Healthcare, Bosch Healthcare, Eli Lilly, Gait-up. Jeffrey M. Hausdorff reports having submitted a patent for assessment of mobility using wearable sensors in 400 Parkinson's disease; the intellectual property rights 401 are held by the Tel Aviv Medical Center. Luca Palmerini and Lorenzo Chiari are co-founders and own shares of mHealth Technologies.

### Funding

This study was co-funded by the European Union's Horizon 2020 research and innovation programme and EFPIA via the Innovative Medicine Initiative 2 (Mobilise-D project, grant number IMI22017-13-7-820820). The views expressed are those of the authors and not necessarily those of the IMI, the European Union, the EFPIA, or any Associated Partners. We acknowledge the support of Grünenthal GmbH via the funding of a PhD scholarship directly dedicated to the technical validation protocol.

We acknowledge support from the Spanish Ministry of Science and Innovation through the "Centro de Excelencia Severo Ochoa 2019-2023" Program (CEX2018-000806-S), and support from the Generalitat de Catalunya through the CERCA Program. SDD, AJY and LR are also supported by the Newcastle Biomedical Research Centre (BRC) based at Newcastle upon Tyne and Newcastle University. CM, BS and EB are also supported by the Sheffield Biomedical Research Centre (BRC) based at the Sheffield Teaching Hospital and the University of Sheffield. The work was also supported



1  
2  
3  
4  
5  
6  
7  
8  
9  
10  
11  
12  
13  
14  
15  
16  
17  
18  
19  
20  
21  
22  
23  
24  
25  
26  
27  
28  
29  
30  
31  
32  
33  
34  
35  
36  
37  
38  
39  
40  
41  
42  
43  
44  
45  
46  
47  
48  
49  
50  
51  
52  
53  
54  
55  
56  
57  
58  
59  
60

by the NIHR/Wellcome Trust Clinical Research Facility (CRF) infrastructure at Newcastle upon Tyne Hospitals NHS Foundation Trust and the CRF at the Sheffield Teaching Hospital. The views expressed are those of the author(s) and not necessarily those of the NIHR or the Department of Health and Social Care or the funders.

For peer review only

## References

- 1 Team WHOD of MH and SA and WHO and WHOD of MH and SAMH and WHOMHE an. *Mental health atlas 2005*. World Health Organization 2005.
- 2 Studenski S, Perera S, Patel K, *et al*. Gait Speed and Survival in Older Adults. *JAMA* 2011;**305**:50–8. doi:10.1001/jama.2010.1923
- 3 Perera S, Patel K V, Rosano C, *et al*. Gait Speed Predicts Incident Disability: A Pooled Analysis. *Journals Gerontol Ser A* 2016;**71**:63–71. doi:10.1093/gerona/glv126
- 4 Rochester L, Mazzà C, Mueller A, *et al*. A Roadmap to Inform Development, Validation and Approval of Digital Mobility Outcomes: The Mobilise-D Approach. *Digit Biomarkers* 2020;**4**:13–27. doi:10.1159/000512513
- 5 Del Din S, Godfrey A, Mazzà C, *et al*. Free-living monitoring of Parkinson's disease: Lessons from the field. *Mov Disord* 2016;**31**:1293–313. doi:10.1002/mds.26718
- 6 Bonci T, Keogh A, Din S Del, *et al*. An objective methodology for the selection of a device for continuous mobility assessment. *Sensors (Switzerland)* 2020;**20**:1–16. doi:10.3390/s20226509
- 7 Gao Y, Li H, Luo Y. An empirical study of wearable technology acceptance in healthcare. *Ind Manag Data Syst* 2015;**115**:1704–23. doi:10.1108/IMDS-03-2015-0087
- 8 Jia Y, Wang W, Wen D, *et al*. Perceived user preferences and usability evaluation of mainstream wearable devices for health monitoring. *PeerJ* 2018;**2018**:1–17. doi:10.7717/peerj.5350
- 9 Puri A, Kim B, Nguyen O, *et al*. User acceptance of wrist-worn activity trackers among community-dwelling older adults: Mixed method study. *JMIR mHealth uHealth* 2017;**5**. doi:10.2196/mhealth.8211
- 10 Viceconti M, Penna SH, Dartee W, *et al*. Toward a regulatory qualification of real-world mobility performance biomarkers in parkinson's patients using digital mobility outcomes. *Sensors (Switzerland)* 2020;**20**:1–13. doi:10.3390/s20205920
- 11 Mobilise-D website. <https://www.mobilise-d.eu/> (accessed 18 Feb 2021).
- 12 Bartlett JW, Frost C. Reliability, repeatability and reproducibility: Analysis of measurement errors in continuous variables. *Ultrasound Obstet Gynecol* 2008;**31**:466–75. doi:10.1002/uog.5256
- 13 Systems M, Development S, Devices E. *IEEE Standard for Sensor Performance Parameter Definitions*. 2014.
- 14 El-Sheimy N, Hou H, Niu X. Analysis and modeling of inertial sensors using allan variance.

- 1  
2  
3 *IEEE Trans Instrum Meas* 2008;**57**:140–9. doi:10.1109/TIM.2007.908635
- 4  
5 15 Hussen AA, Jleta IN. Low-Cost Inertial Sensors Modeling Using Allan Variance. *Int Sch Sci*  
6 *Res Innov* 2015;**9**:1069–74.
- 7  
8  
9 16 IEEE Aerospace and Electronic Systems Society (institution). *IEEE Standard Specification*  
10 *Format Guide and Test Procedure for Single-Axis Laser Gyros*. 1995.
- 11  
12  
13 17 Ferraris F, Gorini I, Grimaldi U, *et al*. Calibration of three-axial rate gyros without angular  
14 velocity standards. *Sensors Actuators, A Phys* 1994;**42**:446–9. doi:10.1016/0924-  
15 4247(94)80031-6
- 16  
17  
18 18 Stančin S, Tomažič S. Time- and computation-efficient calibration of MEMS 3D  
19 accelerometers and gyroscopes. *Sensors (Switzerland)* 2014;**14**:14885–915.  
20 doi:10.3390/s140814885
- 21  
22  
23 19 Kluge F, Din S Del, Cereatti A, *et al*. Consensus based framework for digital mobility  
24 monitoring. Published Online First: 2020. doi:https://doi.org/10.1101/2020.12.18.20248404
- 25  
26  
27 20 Nasreddine ZS, Phillips NA, Bédirian V, *et al*. The Montreal Cognitive Assessment, MoCA: A  
28 Brief Screening Tool For Mild Cognitive Impairment. *J Am Geriatr Soc* 2005;**53**:695–9.  
29 doi:https://doi.org/10.1111/j.1532-5415.2005.53221.x
- 30  
31  
32 21 Postuma RB, Berg D, Stern M, *et al*. MDS clinical diagnostic criteria for Parkinson's disease.  
33 *Mov Disord* 2015;**30**:1591–601. doi:10.1002/mds.26424
- 34  
35  
36 22 COSMIN. <https://www.cosmin.nl/> (accessed 18 Feb 2021).
- 37  
38 23 COSMIN Study Design checklist for Patient-reported outcome measurement instruments.  
39 [https://www.cosmin.nl/wp-content/uploads/COSMIN-study-designing-checklist\\_final.pdf](https://www.cosmin.nl/wp-content/uploads/COSMIN-study-designing-checklist_final.pdf)  
40 (accessed 18 Feb 2021).
- 41  
42  
43 24 Jette AM, Haley SM, Coster WJ, *et al*. Late Life Function and Disability Instrument: I.  
44 Development and Evaluation of the Disability Component. *Journals Gerontol Ser A*  
45 2002;**57**:M209–16. doi:10.1093/gerona/57.4.M209
- 46  
47  
48 25 Haley SM, Jette AM, Coster WJ, *et al*. Late Life Function and Disability Instrument: II.  
49 Development and Evaluation of the Function Component. *Journals Gerontol Ser A*  
50 2002;**57**:M217–22. doi:10.1093/gerona/57.4.M217
- 51  
52  
53 26 Goetz CG, Tilley BC, Shaftman SR, *et al*. Movement Disorder Society-sponsored revision of  
54 the Unified Parkinson's Disease Rating Scale (MDS-UPDRS): Scale presentation and  
55 clinimetric testing results. *Mov Disord* 2008;**23**:2129–70.  
56 doi:https://doi.org/10.1002/mds.22340
- 57  
58  
59 27 Kurtzke JF. Rating neurologic impairment in multiple sclerosis. *Neurology* 1983;**33**:1444 LP –

- 1  
2  
3 1444. doi:10.1212/WNL.33.11.1444  
4
- 5 28 Gupta N, Pinto LM, Morogan A, *et al.* The COPD assessment test: a systematic review. *Eur*  
6 *Respir J* 2014;**44**:873 LP – 884. doi:10.1183/09031936.00025214  
7
- 8  
9 29 Green CP, Porter CB, Bresnahan DR, *et al.* Development and evaluation of the Kansas City  
10 Cardiomyopathy Questionnaire: a new health status measure for heart failure. *J Am Coll*  
11 *Cardiol* 2000;**35**:1245–55. doi:10.1016/S0735-1097(00)00531-3  
12  
13
- 14 30 Di Marco R, Rossi S, Castelli E, *et al.* Effects of the calibration procedure on the metrological  
15 performances of stereophotogrammetric systems for human movement analysis. *Meas J Int*  
16 *Meas Confed* 2017;**101**:265–71. doi:10.1016/j.measurement.2016.01.008  
17  
18
- 19 31 Bertuletti S, Cereatti A, Comotti D, *et al.* Static and dynamic accuracy of an innovative  
20 miniaturized wearable platform for short range distance measurements for human movement  
21 applications. *Sensors (Switzerland)* 2017;**17**:1–15. doi:10.3390/s17071492  
22  
23
- 24 32 Salis F, Bertuletti S, Caruso M, *et al.* Multi-sensor integration and data fusion for enhancing  
25 gait assessment in and out of the laboratory. *Gait Posture* 2019;**74**:34.  
26  
27 doi:10.1016/j.gaitpost.2019.07.493  
28  
29
- 30 33 Bertuletti S, Della Croce U, Cereatti A. A wearable solution for accurate step detection based  
31 on the direct measurement of the inter-foot distance. *J Biomech* 2019;**84**:274–7.  
32  
33 doi:https://doi.org/10.1016/j.jbiomech.2018.12.039  
34
- 35 34 Caruso M, Sabatini AM, Knaflitz M, *et al.* Orientation Estimation Through Magneto-Inertial  
36 Sensor Fusion: A Heuristic Approach for Suboptimal Parameters Tuning. *IEEE Sens J*  
37 2020;:1. doi:10.1109/JSEN.2020.3024806  
38  
39
- 40 35 Caruso M, Sabatini AM, Knaflitz M, *et al.* Accuracy of the Orientation Estimate Obtained  
41 Using Four Sensor Fusion Filters Applied to Recordings of Magneto-Inertial Sensors Moving  
42 at Three Rotation Rates. In: *2019 41st Annual International Conference of the IEEE*  
43 *Engineering in Medicine and Biology Society (EMBC)*. 2019. 2053–8.  
44  
45 doi:10.1109/EMBC.2019.8857655  
46  
47
- 48 36 Skog I, Nilsson J, Händel P. Evaluation of zero-velocity detectors for foot-mounted inertial  
49 navigation systems. In: *2010 International Conference on Indoor Positioning and Indoor*  
50 *Navigation*. 2010. 1–6. doi:10.1109/IPIN.2010.5646936  
51  
52
- 53 37 Peruzzi A, Della Croce U, Cereatti A. Estimation of stride length in level walking using an  
54 inertial measurement unit attached to the foot: A validation of the zero velocity assumption  
55 during stance. *J Biomech* 2011;**44**:1991–4. doi:10.1016/j.jbiomech.2011.04.035  
56  
57
- 58 38 Trojaniello D, Cereatti A, Pelosin E, *et al.* Estimation of step-by-step spatio-temporal  
59  
60

- parameters of normal and impaired gait using shank-mounted magneto-inertial sensors : application to elderly , hemiparetic , parkinsonian and choreic gait. 2014;**44**:152.
- 39 Köse A, Cereatti A, Della Croce U. Bilateral step length estimation using a single inertial measurement unit attached to the pelvis. *J Neuroeng Rehabil* 2012;**9**. doi:10.1186/1743-0003-9-9
- 40 Trojaniello D, Cereatti A, Ravaschio A, *et al*. Assessment of gait direction changes during straight-ahead walking in healthy elderly and Huntington Disease patients using a shank worn MIMU. In: *2014 36th Annual International Conference of the IEEE Engineering in Medicine and Biology Society*. 2014. 2508–11. doi:10.1109/EMBC.2014.6944132
- 41 Trojaniello D, Cereatti A, Croce U Della. Gait direction of progression changes using shank worn MIMUs. In: *GBN Conference, Pavia*. 2014.
- 42 Salis F, Bertuletti S, Caruso M, *et al*. A novel multi-sensor system for gait assessment in real-world conditions: preliminary results. In: *Proceedings of GNB 2020*. 2020.
- 43 Zijlstra W, Hof AL. Assessment of spatio-temporal gait parameters from trunk accelerations during human walking. *Gait Posture* 2003;**18**:1–10. doi:https://doi.org/10.1016/S0966-6362(02)00190-X
- 44 Ngueleu AM, Blanchette AK, Bouyer L, *et al*. Design and accuracy of an instrumented insole using pressure sensors for step count. *Sensors (Switzerland)* 2019;**19**:12–4. doi:10.3390/s19050984
- 45 Nightingale CJ, Mitchell SN, Butterfield SA. Validation of the Timed Up and Go Test for Assessing Balance Variables in Adults Aged 65 and Older. *J Aging Phys Act*; **27**:230–3. doi:10.1123/japa.2018-0049 10.1123/japa.2018-0049
- 46 Deathe AB, Miller WC. The L Test of Functional Mobility: Measurement Properties of a Modified Version of the Timed “Up & Go” Test Designed for People With Lower-Limb Amputations. *Phys Ther* 2005;**85**:626–35. doi:10.1093/ptj/85.7.626
- 47 Pham MH, Elshehabi M, Haertner L, *et al*. Validation of a Step Detection Algorithm during Straight Walking and Turning in Patients with Parkinson’s Disease and Older Adults Using an Inertial Measurement Unit at the Lower Back . *Front. Neurol.* . 2017;**8**:457.https://www.frontiersin.org/article/10.3389/fneur.2017.00457
- 48 Ciravegna F, Gao J, Ireson N, *et al*. Active 10: Brisk Walking to Support Regular Physical Activity. In: *Proceedings of the 13th EAI International Conference on Pervasive Computing Technologies for Healthcare*. New York, NY, USA: : Association for Computing Machinery 2019. 11–20. doi:10.1145/3329189.3329208

- 1  
2  
3 49 Open Street Map. <https://www.openstreetmap.org> (accessed 18 Feb 2021).  
4  
5 50 Ordnance Survey Terrain 5. [https://www.ordnancesurvey.co.uk/business-](https://www.ordnancesurvey.co.uk/business-government/products/terrain-5)  
6 [government/products/terrain-5](https://www.ordnancesurvey.co.uk/business-government/products/terrain-5) (accessed 18 Feb 2021).  
7  
8  
9 51 U.S. Releases Enhanced Shuttle Land Elevation Data. <https://www2.jpl.nasa.gov/srtm/>  
10 (accessed 18 Feb 2021).  
11  
12 52 Rabinovich RA, Louvaris Z, Raste Y, *et al.* Validity of physical activity monitors during daily  
13 life in patients with COPD. *Eur Respir J* 2013;**42**:1205–15. doi:10.1183/09031936.00134312  
14  
15 53 Knight JF, Baber C, Schwirtz A, *et al.* The comfort assessment of wearable computers. *Proc -*  
16 *Int Symp Wearable Comput ISWC 2002*;2002-Janua:65–72. doi:10.1109/ISWC.2002.1167220  
17  
18 54 Brooke J. SUS: a “quick and dirty” usability”. *Usability Eval Ind* 1196;**Jun 11**:189.  
19  
20 55 Lewis JR. IBM computer usability satisfaction questionnaires: Psychometric evaluation and  
21 instructions for use. *Int J Human-Computer Interact* 1995;**7**:57–78.  
22 doi:10.1080/10447319509526110  
23  
24 56 Hiden H, Woodman S, Watson P, *et al.* Developing cloud applications using the e-Science  
25 Central platform. *Philos Trans R Soc A Math Phys Eng Sci* 2013;**371**.  
26 doi:10.1098/rsta.2012.0085  
27  
28 57 Data Integrity and Compliance With CGMP. Guidance for Industry.  
29 [https://www.fda.gov/files/drugs/published/Data-Integrity-and-Compliance-With-Current-](https://www.fda.gov/files/drugs/published/Data-Integrity-and-Compliance-With-Current-Good-Manufacturing-Practice-Guidance-for-Industry.pdf)  
30 [Good-Manufacturing-Practice-Guidance-for-Industry.pdf](https://www.fda.gov/files/drugs/published/Data-Integrity-and-Compliance-With-Current-Good-Manufacturing-Practice-Guidance-for-Industry.pdf) (accessed 18 Feb 2021).  
31  
32 58 Braun V, Clarke V. Using thematic analysis in psychology. *Qual Res Psychol* 2006;**3**:77–101.  
33 doi:10.1191/1478088706qp063oa  
34  
35 59 Letter of support for Mobilise-D digital mobility outcomes as monitoring biomarkers.  
36 [https://www.ema.europa.eu/en/documents/other/letter-support-mobilise-d-digital-mobility-](https://www.ema.europa.eu/en/documents/other/letter-support-mobilise-d-digital-mobility-outcomes-monitoring-biomarkers_en.pdf)  
37 [outcomes-monitoring-biomarkers\\_en.pdf](https://www.ema.europa.eu/en/documents/other/letter-support-mobilise-d-digital-mobility-outcomes-monitoring-biomarkers_en.pdf) (accessed 18 Feb 2021).  
38  
39  
40  
41  
42  
43  
44  
45  
46  
47  
48  
49  
50  
51  
52  
53  
54  
55  
56  
57  
58  
59  
60

1  
2  
3  
4  
5  
6  
7  
8  
9  
10  
11  
12  
13  
14  
15  
16  
17  
18  
19  
20  
21  
22  
23  
24  
25  
26  
27  
28  
29  
30  
31  
32  
33  
34  
35  
36  
37  
38  
39  
40  
41  
42  
43  
44  
45  
46  
47  
48  
49  
50  
51  
52  
53  
54  
55  
56  
57  
58  
59  
60

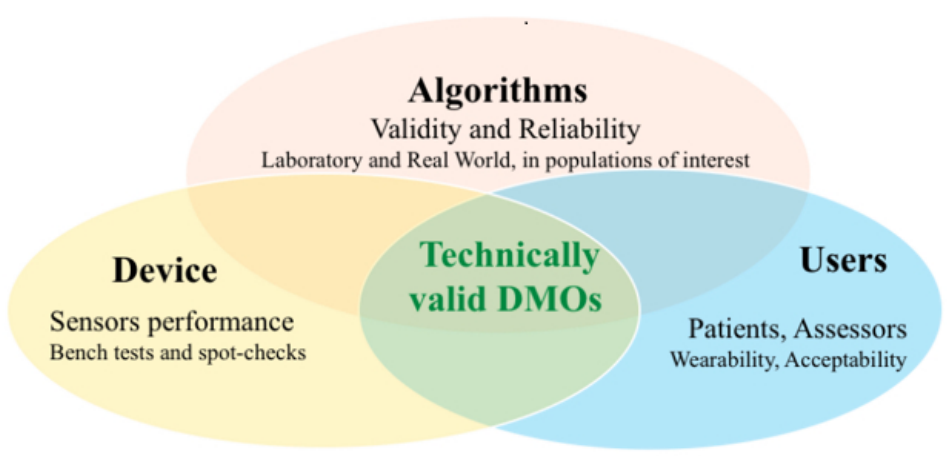

Concurrent domains to be assessed as part of a technical validation of digital mobility outcomes (DMOs) obtained from a wearable device.

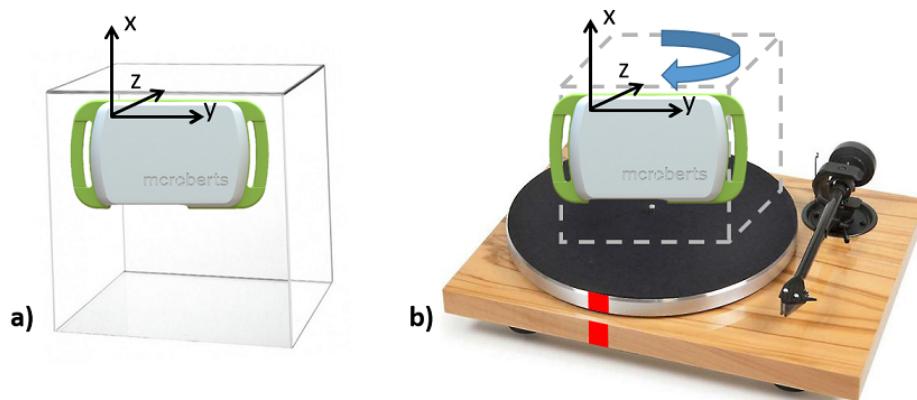

Testing configurations used during (a) short static (plexiglass cube and device) and (b) dynamic (turntable and device) acquisitions. Marks (in red) are applied on both on the turntable and on the base to identify start/end, which have to align for the dynamic tests.



1  
2  
3  
4  
5  
6  
7  
8  
9  
10  
11  
12  
13  
14  
15  
16  
17  
18  
19  
20  
21  
22  
23  
24  
25  
26  
27  
28  
29  
30  
31  
32  
33  
34  
35  
36  
37  
38  
39  
40  
41  
42  
43  
44  
45  
46  
47  
48  
49  
50  
51  
52  
53  
54  
55  
56  
57  
58  
59  
60

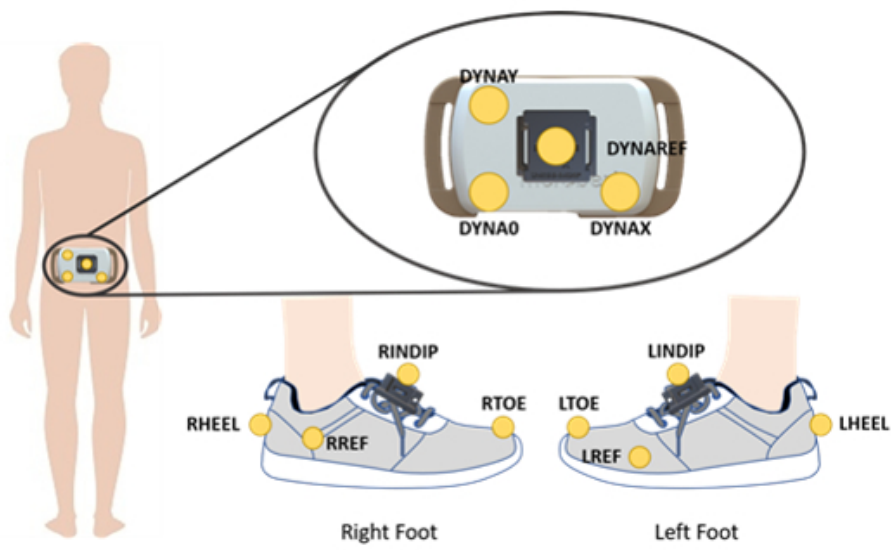

Illustration of the adopted marker set configuration.

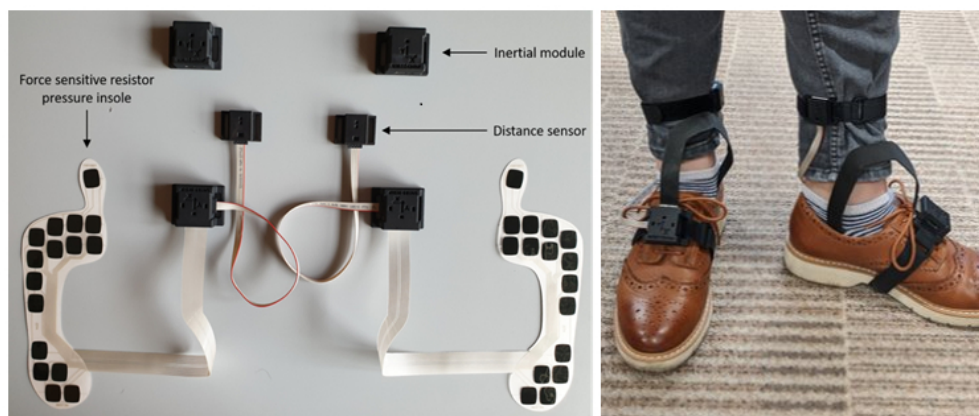

The INDIP system.

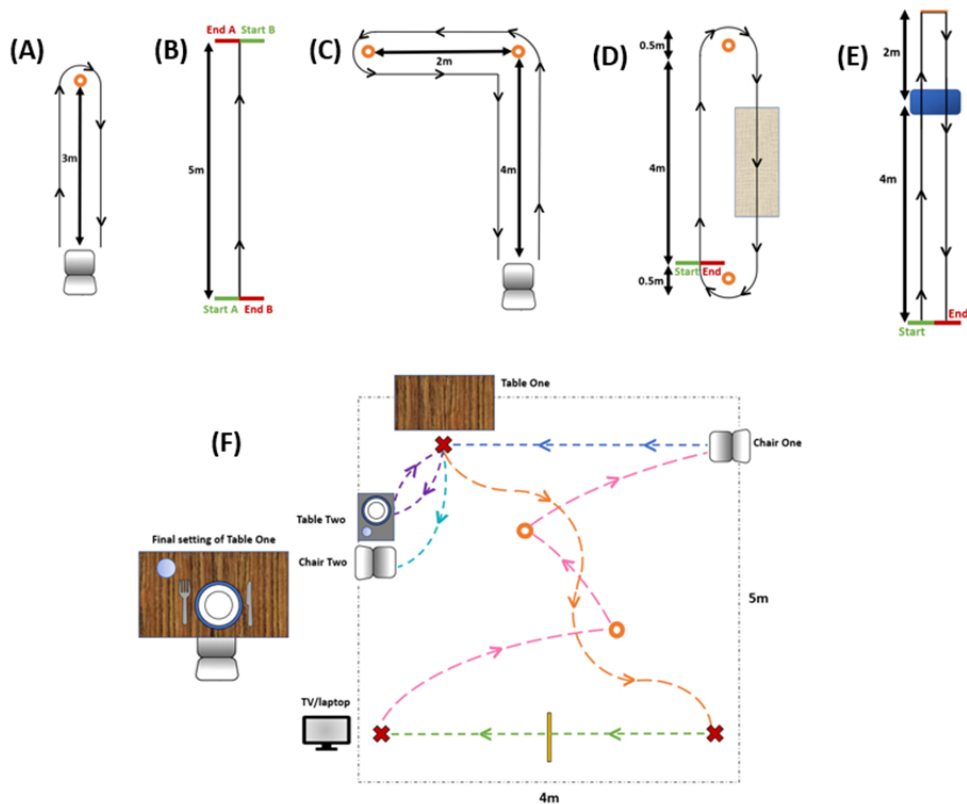

Diagrams of the selected tasks: (A) Timed Up and Go, (B) Straight Walking Test, (C) L-Test, (D) Surface Test, (E) Hallway Test, (F) Daily living activities. The tasks here are split into eight steps: (1) stand and walk to the red cross/cone next to the table, (2) set table one for dinner using the supplies on table two. (3) Sit down for a quick break and a drink (4) stand up and clear table one by placing all the items back on table two. (5) Walk to corner of the lab diagonally opposite while snaking around the cones in the middle of the floor. (6) Walk straight to the tv/laptop and (7) stand to watch a 1-minute video on the TV/laptop or have a conversation with the researcher. The participant will be advised that if they wish to sit before the minute is over a chair will be brought over by a researcher. (8) Walk back to chair one and sit down.

# BMJ Open

## A MULTI-CENTRIC OBSERVATIONAL STUDY FOR THE TECHNICAL VALIDATION OF REAL-WORLD MONITORING OF GAIT

|                               |                                                                                                                                                                                                                                                                                                                                                                                                                                                                                                                                                                                                                                                                                                                                                                                                                                                                                                                                                                                                                                                                                                                                                                                                                                                                                                                                                                                                                                                                                                                                                                                                                                                                                                                                                                                                                                                                                                                                                                                                                                                                                                                                                                                                                                                                                                                                                                |
|-------------------------------|----------------------------------------------------------------------------------------------------------------------------------------------------------------------------------------------------------------------------------------------------------------------------------------------------------------------------------------------------------------------------------------------------------------------------------------------------------------------------------------------------------------------------------------------------------------------------------------------------------------------------------------------------------------------------------------------------------------------------------------------------------------------------------------------------------------------------------------------------------------------------------------------------------------------------------------------------------------------------------------------------------------------------------------------------------------------------------------------------------------------------------------------------------------------------------------------------------------------------------------------------------------------------------------------------------------------------------------------------------------------------------------------------------------------------------------------------------------------------------------------------------------------------------------------------------------------------------------------------------------------------------------------------------------------------------------------------------------------------------------------------------------------------------------------------------------------------------------------------------------------------------------------------------------------------------------------------------------------------------------------------------------------------------------------------------------------------------------------------------------------------------------------------------------------------------------------------------------------------------------------------------------------------------------------------------------------------------------------------------------|
| Journal:                      | <i>BMJ Open</i>                                                                                                                                                                                                                                                                                                                                                                                                                                                                                                                                                                                                                                                                                                                                                                                                                                                                                                                                                                                                                                                                                                                                                                                                                                                                                                                                                                                                                                                                                                                                                                                                                                                                                                                                                                                                                                                                                                                                                                                                                                                                                                                                                                                                                                                                                                                                                |
| Manuscript ID                 | bmjopen-2021-050785.R1                                                                                                                                                                                                                                                                                                                                                                                                                                                                                                                                                                                                                                                                                                                                                                                                                                                                                                                                                                                                                                                                                                                                                                                                                                                                                                                                                                                                                                                                                                                                                                                                                                                                                                                                                                                                                                                                                                                                                                                                                                                                                                                                                                                                                                                                                                                                         |
| Article Type:                 | Protocol                                                                                                                                                                                                                                                                                                                                                                                                                                                                                                                                                                                                                                                                                                                                                                                                                                                                                                                                                                                                                                                                                                                                                                                                                                                                                                                                                                                                                                                                                                                                                                                                                                                                                                                                                                                                                                                                                                                                                                                                                                                                                                                                                                                                                                                                                                                                                       |
| Date Submitted by the Author: | 05-Aug-2021                                                                                                                                                                                                                                                                                                                                                                                                                                                                                                                                                                                                                                                                                                                                                                                                                                                                                                                                                                                                                                                                                                                                                                                                                                                                                                                                                                                                                                                                                                                                                                                                                                                                                                                                                                                                                                                                                                                                                                                                                                                                                                                                                                                                                                                                                                                                                    |
| Complete List of Authors:     | <p>Mazzà, Claudia; The University of Sheffield, INSIGNEO Institute for in silico Medicine; The University of Sheffield, Department of Mechanical Engineering</p> <p>Alcock, Lisa; University of Newcastle upon Tyne, Translational and Clinical Research Institute, Faculty of Medical Sciences</p> <p>Aminian, Kamiar; Ecole Polytechnique Federale de Lausanne, Laboratory of Movement Analysis and Measurement</p> <p>Becker, Clemens; Robert Bosch Gesellschaft für Medizinische Forschung</p> <p>Bertuletti, Stefano; University of Sassari, Department of Biomedical Sciences</p> <p>Bonci, Tecla; The University of Sheffield, INSIGNEO Institute for in silico Medicine; The University of Sheffield, Department of Mechanical Engineering</p> <p>Brown, Philip; Newcastle Upon Tyne Hospitals NHS Foundation Trust</p> <p>Brozgol, Marina; Tel Aviv Sourasky Medical Center, Center for the Study of Movement, Cognition and Mobility, Neurological Institute</p> <p>Buckley, Ellen; The University of Sheffield, INSIGNEO Institute for in silico Medicine; The University of Sheffield, Department of Mechanical Engineering</p> <p>Carsin, Anne-Elie; Instituto de Salud Global Barcelona</p> <p>Caruso, Marco; Politecnico di Torino Dipartimento di Elettronica e Telecomunicazioni; Politecnico di Torino, PolitoBIOMed Lab – Biomedical Engineering Lab</p> <p>Caulfield, Brian; University College Dublin, Insight Centre for Data Analytics, O'Brien Science Centre; University College Dublin, UCD School of Public Health, Physiotherapy and Sports Science</p> <p>Cereatti, Andrea; Politecnico di Torino Dipartimento di Elettronica e Telecomunicazioni</p> <p>Chiari, Lorenzo; University of Bologna, Department of Electrical, Electronic and Information Engineering «Guglielmo Marconi»; University of Bologna, Health Sciences and Technologies—Interdepartmental Center for Industrial Research (CIRI-SDV)</p> <p>Chynkiamis, Nikolaos; Northumbria University Newcastle, Department of Sport, Exercise and Rehabilitation</p> <p>Ciravegna, Fabio; The University of Sheffield, Department of Computer Science; The University of Sheffield, INSIGNEO Institute for in silico Medicine</p> <p>Del Din, Silvia; University of Newcastle upon Tyne, Translational and Clinical Research Institute, Faculty of Medical Sciences</p> |

|    |                                                                              |
|----|------------------------------------------------------------------------------|
| 1  |                                                                              |
| 2  |                                                                              |
| 3  |                                                                              |
| 4  | Eskofier, Björn; Friedrich-Alexander-Universität Erlangen-Nürnberg,          |
| 5  | Machine Learning and Data Analytics Lab, Department of Artificial            |
| 6  | Intelligence in Biomedical Engineering                                       |
| 7  | Evers, Jordi; McRoberts BV                                                   |
| 8  | Garcia Aymerich, Judith; Instituto de Salud Global Barcelona                 |
| 9  | Gazit, Eran; Tel Aviv Sourasky Medical Center, Center for the Study of       |
| 10 | Movement, Cognition and Mobility, Neurological Institute                     |
| 11 | Hansen, Clint; University Medical Center Schleswig-Holstein Campus           |
| 12 | Kiel, Department of Neurology                                                |
| 13 | Hausdorff, Jeffrey; Tel Aviv Sourasky Medical Center, Center for the         |
| 14 | Study of Movement, Cognition and Mobility, Neurological Institute; Tel       |
| 15 | Aviv University, Department of Physical Therapy, Sackler Faculty of          |
| 16 | Medicine & Sagol School of Neuroscience                                      |
| 17 | Helbostad, Jorunn; Norwegian University of Science and Technology,           |
| 18 | Department of Neuromedicine and Movement Science                             |
| 19 | Hide, Hugo; University of Newcastle upon Tyne, School of Computing           |
| 20 | Hume, Emily; Northumbria University Newcastle, Department of Sport,          |
| 21 | Exercise and Rehabilitation                                                  |
| 22 | Paraschiv-Ionescu, Anisoara; Ecole Polytechnique Federale de Lausanne,       |
| 23 | Laboratory of Movement Analysis and Measurement                              |
| 24 | Ireson, Neil; The University of Sheffield, Department of Computer            |
| 25 | Science; The University of Sheffield, INSIGNEO Institute for in silico       |
| 26 | Medicine                                                                     |
| 27 | Keogh, Alison; University College Dublin, Insight Centre for Data            |
| 28 | Analytics, O'Brien Science Centre; University College Dublin, UCD School     |
| 29 | of Public Health, Physiotherapy and Sports Science                           |
| 30 | Kirk, Cameron; University of Newcastle upon Tyne, Translational and          |
| 31 | Clinical Research Institute, Faculty of Medical Sciences                     |
| 32 | Kluge, Felix; Friedrich-Alexander-Universität Erlangen-Nürnberg,             |
| 33 | Machine Learning and Data Analytics Lab, Department of Artificial            |
| 34 | Intelligence in Biomedical Engineering                                       |
| 35 | Koch, Sarah; Instituto de Salud Global Barcelona                             |
| 36 | Küderle, Arne; Friedrich-Alexander-Universität Erlangen-Nürnberg,            |
| 37 | Machine Learning and Data Analytics Lab, Department of Artificial            |
| 38 | Intelligence in Biomedical Engineering                                       |
| 39 | Lanfranchi, Vitaveska; The University of Sheffield, Department of            |
| 40 | Computer Science; The University of Sheffield, INSIGNEO Institute for in     |
| 41 | silico Medicine                                                              |
| 42 | Maetzler, Walter; University Medical Center Schleswig-Holstein Campus        |
| 43 | Kiel, Department of Neurology                                                |
| 44 | Micó-Amigo, M. Encarna; University of Newcastle upon Tyne,                   |
| 45 | Translational and Clinical Research Institute, Faculty of Medical Sciences   |
| 46 | Mueller, Arne; Novartis Pharma AG, Novartis Institutes of Biomedical         |
| 47 | Research                                                                     |
| 48 | Neatrou, Isabel; University of Newcastle upon Tyne, Translational and        |
| 49 | Clinical Research Institute, Faculty of Medical Sciences                     |
| 50 | Niessen, Martjin; McRoberts BV                                               |
| 51 | Palmerini, Luca; University of Bologna, Department of Electrical,            |
| 52 | Electronic and Information Engineering «Guglielmo Marconi»; University       |
| 53 | of Bologna, Health Sciences and Technologies—Interdepartmental Center        |
| 54 | for Industrial Research (CIRI-SDV)                                           |
| 55 | Pluimgraaff, Lucas; McRoberts BV                                             |
| 56 | Reggi, Luca; University of Bologna, Health Sciences and Technologies—        |
| 57 | Interdepartmental Center for Industrial Research (CIRI-SDV)                  |
| 58 | Salis, Francesca; University of Sassari, Department of Biomedical            |
| 59 | Sciences                                                                     |
| 60 | Schwickert, Lars; Robert Bosch Gesellschaft für Medizinische Forschung       |
|    | Scott, Kirsty; The University of Sheffield, INSIGNEO Institute for in silico |
|    | Medicine; The University of Sheffield, Department of Mechanical              |
|    | Engineering                                                                  |
|    | Sharrack, Basil; Sheffield Teaching Hospitals NHS Foundation Trust,          |

|                                 |                                                                                                                                                                                                                                                                                                                                                                                                                                                                                                                                                                                                                                                                                                                                                                                                                                                                                                                                                                                                                                                                                                                                                                                                                                                                                                                                                                                                                                                                                                                                                                                                                                           |
|---------------------------------|-------------------------------------------------------------------------------------------------------------------------------------------------------------------------------------------------------------------------------------------------------------------------------------------------------------------------------------------------------------------------------------------------------------------------------------------------------------------------------------------------------------------------------------------------------------------------------------------------------------------------------------------------------------------------------------------------------------------------------------------------------------------------------------------------------------------------------------------------------------------------------------------------------------------------------------------------------------------------------------------------------------------------------------------------------------------------------------------------------------------------------------------------------------------------------------------------------------------------------------------------------------------------------------------------------------------------------------------------------------------------------------------------------------------------------------------------------------------------------------------------------------------------------------------------------------------------------------------------------------------------------------------|
|                                 | <p>Department of Neuroscience and Sheffield NIHR Translational Neuroscience BRC<br/> Sillen, Henrik; AstraZeneca Sweden, Digital Health R&amp;D<br/> Singleton, David; University College Dublin, Insight Centre for Data Analytics, O'Brien Science Centre; University College Dublin, UCD School of Public Health, Physiotherapy and Sports Science<br/> Soltani, Abolfazi; Ecole Polytechnique Federale de Lausanne, Laboratory of Movement Analysis and Measurement<br/> Taraldsen, Kristin; Norwegian University of Science and Technology, Department of Neuromedicine and Movement Science<br/> Ullrich, Martin; Friedrich-Alexander-Universität Erlangen-Nürnberg, Machine Learning and Data Analytics Lab, Department of Computer Science<br/> Van Gelder, Linda; The University of Sheffield, INSIGNEO Institute for in silico Medicine; The University of Sheffield, Department of Mechanical Engineering<br/> Vereijken, Beatrix; Norwegian University of Science and Technology, Department of Neuromedicine and Movement Science<br/> Vogiatzis, Ioannis ; Northumbria University Newcastle, Department of Sport, Exercise and Rehabilitation<br/> Warmerdam, Elke; University Medical Center Schleswig-Holstein Campus Kiel, Department of Neurology<br/> Yarnall, Alison; Newcastle University Faculty of Medical Sciences, Translational and Clinical Research Institute; Newcastle Upon Tyne Hospitals NHS Foundation Trust<br/> Rochester, Lynn; University of Newcastle upon Tyne, Translational and Clinical Research Institute, Faculty of Medical Sciences; Newcastle Upon Tyne Hospitals NHS Foundation Trust</p> |
| <b>Primary Subject Heading</b>: | Diagnostics                                                                                                                                                                                                                                                                                                                                                                                                                                                                                                                                                                                                                                                                                                                                                                                                                                                                                                                                                                                                                                                                                                                                                                                                                                                                                                                                                                                                                                                                                                                                                                                                                               |
| Secondary Subject Heading:      | Research methods, Neurology, Respiratory medicine                                                                                                                                                                                                                                                                                                                                                                                                                                                                                                                                                                                                                                                                                                                                                                                                                                                                                                                                                                                                                                                                                                                                                                                                                                                                                                                                                                                                                                                                                                                                                                                         |
| Keywords:                       | Multiple sclerosis < NEUROLOGY, Parkinson-s disease < NEUROLOGY, Hip < ORTHOPAEDIC & TRAUMA SURGERY, Chronic airways disease < THORACIC MEDICINE, Heart failure < CARDIOLOGY                                                                                                                                                                                                                                                                                                                                                                                                                                                                                                                                                                                                                                                                                                                                                                                                                                                                                                                                                                                                                                                                                                                                                                                                                                                                                                                                                                                                                                                              |
|                                 |                                                                                                                                                                                                                                                                                                                                                                                                                                                                                                                                                                                                                                                                                                                                                                                                                                                                                                                                                                                                                                                                                                                                                                                                                                                                                                                                                                                                                                                                                                                                                                                                                                           |

SCHOLARONE™  
Manuscripts



I, the Submitting Author has the right to grant and does grant on behalf of all authors of the Work (as defined in the below author licence), an exclusive licence and/or a non-exclusive licence for contributions from authors who are: i) UK Crown employees; ii) where BMJ has agreed a CC-BY licence shall apply, and/or iii) in accordance with the terms applicable for US Federal Government officers or employees acting as part of their official duties; on a worldwide, perpetual, irrevocable, royalty-free basis to BMJ Publishing Group Ltd ("BMJ") its licensees and where the relevant Journal is co-owned by BMJ to the co-owners of the Journal, to publish the Work in this journal and any other BMJ products and to exploit all rights, as set out in our [licence](#).

The Submitting Author accepts and understands that any supply made under these terms is made by BMJ to the Submitting Author unless you are acting as an employee on behalf of your employer or a postgraduate student of an affiliated institution which is paying any applicable article publishing charge ("APC") for Open Access articles. Where the Submitting Author wishes to make the Work available on an Open Access basis (and intends to pay the relevant APC), the terms of reuse of such Open Access shall be governed by a Creative Commons licence – details of these licences and which [Creative Commons](#) licence will apply to this Work are set out in our licence referred to above.

Other than as permitted in any relevant BMJ Author's Self Archiving Policies, I confirm this Work has not been accepted for publication elsewhere, is not being considered for publication elsewhere and does not duplicate material already published. I confirm all authors consent to publication of this Work and authorise the granting of this licence.

## A MULTI-CENTRIC OBSERVATIONAL STUDY FOR THE TECHNICAL VALIDATION OF REAL-WORLD MONITORING OF GAIT

Mazzà Claudia<sup>1,2</sup>, Alcock Lisa<sup>3</sup>, Aminian Kamiar<sup>4</sup>, Becker Clemens<sup>5</sup>, Bertuletti Stefano<sup>6</sup>, Bonci Tecla<sup>1,2</sup>, Brown Philip<sup>7</sup>, Brozgol Marina<sup>8</sup>, Buckley Ellen<sup>1,2</sup>, Carsin Anne-Elie<sup>9</sup>, Caruso Marco<sup>10,11</sup>, Caulfield Brian<sup>12,13</sup>, Cereatti Andrea<sup>10</sup>, Chiari Lorenzo<sup>14,15</sup>, Chynkiamis Nikolaos<sup>16</sup>, Ciravegna Fabio<sup>1,17</sup>, Del Din Silvia<sup>3</sup>, Eskofier Björn<sup>18</sup>, Evers Jordi<sup>19</sup>, Garcia-Aymerich, Judith<sup>9</sup>, Gazit Eran<sup>8</sup>, Hansen Clint<sup>20</sup>, Hausdorff Jeffrey<sup>8,21</sup>, Helbostad Jorunn<sup>22</sup>, Hiden Hugo<sup>23</sup>, Hume Emily<sup>16</sup>, Paraschiv-Ionescu Anisoara<sup>4</sup>, Ireson Neil<sup>1,17</sup>, Keogh Alison<sup>12,13</sup>, Kirk Cameron<sup>3</sup>, Kluge Felix<sup>18</sup>, Koch Sarah<sup>9</sup>, Küderle Arne<sup>18</sup>, Lanfranchi Vitaveska<sup>1,17</sup>, Maetzler Walter<sup>20</sup>, Micó-Amigo M. Encarna<sup>3</sup>, Mueller Arne<sup>24</sup>, Neatrour Isabel<sup>3</sup>, Niessen Martjin<sup>19</sup>, Palmerini Luca<sup>14,15</sup>, Pluimgraaff Lucas<sup>19</sup>, Reggi Luca<sup>15</sup>, Salis Francesca<sup>6</sup>, Schwickert Lars<sup>5</sup>, Scott Kirsty<sup>1,2</sup>, Sharrack Basil<sup>25</sup>, Sillen Henrik<sup>26</sup>, Singleton David<sup>12,13</sup>, Soltani Abolfazi<sup>4</sup>, Taraldsen Kristin<sup>22</sup>, Ullrich Martin<sup>18</sup>, Van Gelder Linda<sup>1,2</sup>, Vereijken Beatrix<sup>22</sup>, Vogiatzis, Ioannis<sup>16</sup>, Warmerdam Elke<sup>20</sup>, Yarnall Alison<sup>3,7</sup>, Rochester Lynn<sup>3,7</sup>

### Corresponding author:

Prof. Claudia Mazzà

[c.mazza@sheffield.ac.uk](mailto:c.mazza@sheffield.ac.uk)

Pam Liversidge Building - Room F14

Mappin Street, Sheffield, S1 3JD, UK

Phone: +44 (0)114 2226073

1. INSIGNEO Institute for in silico Medicine, The University of Sheffield, Sheffield, UK
2. Department of Mechanical Engineering, The University of Sheffield, Sheffield, UK
3. Translational and Clinical Research Institute, Faculty of Medical Sciences, University of Newcastle upon Tyne, Newcastle upon Tyne, UK
4. Laboratory of Movement Analysis and Measurement, Ecole Polytechnique Federale de Lausanne, Lausanne, Switzerland
5. Robert Bosch Gesellschaft für Medizinische Forschung, Stuttgart, Germany
6. Department of Biomedical Sciences, University of Sassari, Sassari, Italy
7. Newcastle Upon Tyne Hospitals NHS Foundation Trust, Newcastle upon Tyne, UK
8. Center for the Study of Movement, Cognition and Mobility, Neurological Institute, Tel Aviv Sourasky Medical Center, Tel Aviv, Israel
9. Instituto de Salud Global Barcelona, Barcelona, Spain
10. Dipartimento di Elettronica e Telecomunicazioni, Politecnico di Torino, Turin, Italy
11. PolitoBIOMed Lab – Biomedical Engineering Lab, Politecnico di Torino, Turin, Italy
12. Insight Centre for Data Analytics, O'Brien Science Centre, University College Dublin, Dublin, Ireland
13. UCD School of Public Health, Physiotherapy and Sports Science, University College Dublin, Dublin, Ireland
14. Department of Electrical, Electronic and Information Engineering «Guglielmo Marconi», University of Bologna, Bologna, Italy
15. Health Sciences and Technologies—Interdepartmental Center for Industrial Research (CIRI-SDV), University of Bologna, Bologna, Italy
16. Department of Sport, Exercise and Rehabilitation, Northumbria University Newcastle, Newcastle upon Tyne, UK
17. Department of Computer Science, The University of Sheffield, Sheffield, UK
18. Machine Learning and Data Analytics Lab, Department of Artificial Intelligence in Biomedical Engineering, Friedrich-Alexander-Universität Erlangen-Nürnberg, Erlangen, Germany



19. McRoberts BV, The Hague, Netherlands
20. Department of Neurology, University Medical Center Schleswig-Holstein Campus Kiel, Kiel, Germany
21. Department of Physical Therapy, Sackler Faculty of Medicine & Sagol School of Neuroscience, Tel Aviv University, Tel Aviv, Israel
22. Department of Neuromedicine and Movement Science, Norwegian University of Science and Technology, Trondheim, Norway
23. School of Computing, University of Newcastle upon Tyne, Newcastle upon Tyne, UK
24. Novartis Institutes of Biomedical Research, Novartis Pharma AG, Basel, Switzerland
25. Department of Neuroscience and Sheffield NIHR Translational Neuroscience BRC, Sheffield Teaching Hospitals NHS Foundation Trust, Sheffield, UK
26. Digital Health R&D, AstraZeneca, Sweden

### Keywords

Gait analysis; wearable sensors; activity monitoring; users evaluation; mobility outcomes

**Wordcount:** 5491

# 1 ABSTRACT

## Introduction

Existing mobility endpoints based on functional performance, physical assessments and patient self-reporting are often affected by lack of sensitivity, limiting their utility in clinical practice. Wearable devices including inertial measurement units (IMUs) can overcome these limitations by quantifying digital mobility outcomes (DMOs) both during supervised structured assessments and in real-world conditions. The validity of IMU-based methods in the real-world, however, is still limited in patient populations. Rigorous validation procedures should cover the device metrological verification, the validation of the algorithms for the DMOs computation specifically for the population of interest and in daily life situations, and the users' perspective on the device.

## Methods and analysis

This protocol was designed to establish the technical validity and patient acceptability of the approach used to quantify digital mobility in the real-world by Mobilise-D, an EU-funded consortium part of the Innovative Medicine Initiative, aiming at fostering regulatory approval and clinical adoption of DMOs. After defining the procedures for the metrological verification of an IMU based device, the experimental procedures for the validation of algorithms used to calculate the DMOs are presented. These include laboratory and real-world assessment in 120 participants from five groups: healthy older adults; chronic obstructive pulmonary disease, Parkinson's disease, multiple sclerosis, proximal femoral fracture, and congestive heart failure. DMOs extracted from the monitoring device will be compared to those from different reference systems, chosen according to the contexts of observation. Questionnaires and interviews will evaluate the users' perspective on the deployed technology and relevance of the mobility assessment.

## Ethics and Dissemination

The study, registered at ISRCTN (12246987), has been granted ethics approval by the centre's committees (London – Bloomsbury Research Ethics committee; Helsinki Committee, Tel Aviv Sourasky Medical Centre; Medical Faculties of The University of Tübingen and of the University of Kiel). Data and algorithms will be made publicly available.

## Strengths and limitations of this study

- A multi-disciplinary approach was implemented to define a protocol for the validation of tools for mobility monitoring, covering aspects related to devices, algorithms and users.
- A set of rigorous quality assurance procedures have been established to allow for the creation of a high-quality annotated dataset to foster development in the field of digital mobility monitoring.

- Mobility data will be collected in the laboratory and in the real-world for five different cohorts of slow-walkers. and subsequently will be made publicly available at the end of the study.
- The multi-stage and multi-device experimental procedures required by this validation study can be extremely challenging for both the participants and the assessors.
- For the laboratory acquisitions, the level of agreement between the gold standard and the inertial sensor devices might be affected by the limitations associated with a restricted capture volume.

## 2 INTRODUCTION

The ability to move is a key contributor to physical, mental and social well-being, which is in line with the World Health Organisation's (WHO's) definition of health [1]. However, the study of mobility has received relatively little attention, except for diseases characterised by specific mobility dysfunction. The increasing longevity of the world's population together with prolonged survival of many patients with long term conditions means that more people are suffering from loss of mobility, which in turn is a major contributing factor to a loss of independence [2,3]. This has a considerable and growing personal, societal and economic impact. Efforts to mitigate this loss of mobility are an increasing priority and promising interventions are now under investigation.

Existing mobility endpoints based on performance, patient self-reporting and one-off assessment are resource-intensive and lack sensitivity [4], which limits therapeutic development and clinical management. A novel approach is needed that is low cost, simple, accurate and that can be used in the real world, including the home and the community.

Poor gait, especially slow walking, is a key determinant of mobility loss. It is associated with greater mortality, morbidity, cognitive decline, dementia and fall risk [2,3]. Quantifying gait related mobility outcomes, including features such as step/stride duration and their variability, walking speed and asymmetry features is well established in supervised instrumented assessments.

Wearable devices including inertial measurement units (IMUs) that allow digital mobility outcomes (DMOs) to be described, are leading the transition from laboratory-based assessment of mobility (mobility capacity), to continuous, unsupervised monitoring of mobility in daily life conditions (mobility performance). Nonetheless, the validity of IMU-based methods to characterise real-world mobility, and gait in particular, is still limited, especially in populations suffering from pathological conditions. This is because measuring real-world gait is far from simple or straightforward. In addition, complex factors arise from multiple sources that influence outcome measures, including disease characteristics, patient specific habits, environment/context and the purpose of walking. All these factors limit the validity of existing algorithms developed to quantify targeted DMOs [5]. Additionally, validation should include simultaneous evaluation [6] of the participants perception and acceptability of the device [7] as well as aspects related to wearability and usability [8,9]. Finally, a separate assessment of the metrological performance of the sensors contained in the adopted device is required.

1  
2  
3 All these validation steps need to be taken before the DMOs and the associated technologies can be  
4 effectively used for clinical [4] and regulatory [10] purposes (see Figure 1 for summary).  
5  
6  
7

8 [Figure 1 around here]  
9

10  
11 In this paper, we present the comprehensive, multi-stage protocol deployed in the technical validation  
12 study (TVS) that we have developed as part of the IMI2-JU-funded Mobilise-D project (Number  
13 820820 [11]), that aims to validate a new digital method for remote monitoring of mobility. In  
14 particular, this multi-stage protocol aims to: a) verify the metrological performance of the sensors  
15 included in a IMU based monitoring device, using a procedure that could be replicated on any device;  
16 b) establish the validity and reliability [12] of the DMOs estimated by the algorithms using data from  
17 an IMU based device, taking into accounts the effects of populations (e.g., healthy adults, patients with  
18 various conditions), locomotor activities (simple straight walking versus complex walking tasks),  
19 contexts (lab based versus real-world), durations (device wearing time, DMOs hourly and daily  
20 fluctuations, etc.), and contextual confounding factors (such as location of walks, weather, use of  
21 walking aids, etc.); and, c) establish participants' and assessors' opinions on the usability and  
22 acceptability of the monitoring devices that will be deployed.  
23  
24  
25  
26  
27  
28  
29

30 This protocol will provide the stakeholders, the first comprehensive, multi-modal solution to validate  
31 real-world mobility. Notably, the protocol described here has been accepted by the European Medical  
32 Agency [13] as part of the Mobilise-D process for the regulatory qualification of real-world mobility  
33 performance biomarkers in Parkinson's disease. [10]  
34  
35  
36  
37  
38

### 39 **3 METHODS**

40 The monitoring device that will be used in this study to collect mobility data is the DynaPort MM+  
41 IMU (McRoberts, Table 1). In a trade-off between usability, accuracy and ability to provide DMOs for  
42 both at step and stride level, this is attached to the lower back via an elastic waistband and Velcro strap.  
43 The validity of algorithms to accurately estimate DMOs in the real-world will be investigated in 120  
44 participants including: healthy older adults (HA) and in five clinical cohorts (chronic obstructive  
45 pulmonary disease, COPD; Parkinson's disease, PD; multiple sclerosis, MS; proximal femoral fracture,  
46 PFF; and congestive heart failure, CHF), chosen as presenting a variety of gait and mobility features  
47 [4]. The usability and acceptability of the device from the perspective of the participants and the  
48 assessors involved in the study will be established via interviews and questionnaires.  
49  
50  
51  
52  
53  
54  
55

#### 56 **3.1 Verification of the metrological performances of the device**

57 Verifying the performance of a device needs a robust and comprehensive metrological characterisation  
58 of all the sensors that it embeds. This requires a series of standardised procedures (spot-checks) to be  
59  
60

implemented to ensure accuracy of raw data that will be used as input to the algorithms. Table 1 shows the sensing characteristics of the device used in this study, the DynaPort MM+ (dimensions: 106.6 x 58 x 11.5mm, size: 55 grams).

**Table 1** Characteristics of the sensors included in the DynaPort MM+ device

| Sensor                  | Sampling Frequency | Sensor Range | Sensor resolution       |
|-------------------------|--------------------|--------------|-------------------------|
| Tri-axial accelerometer | 100 Hz             | ± 8g         | 1 mg (at ± 8g)          |
| Tri-axial gyroscope     | 100 Hz             | ± 2000 dps   | 70 mdps (at ± 2000 dps) |

According to Institute of Electrical and Electronics Engineers *Standard for Sensor Performance Parameter Definitions* ((IEEE 2700-2017 [14]) a number of parameters are needed to characterise the metrological performance of the accelerometer, gyroscope, and magnetometer included in an IMU. These parameters can be computed under both static and dynamic conditions. The main noise parameters used are the first (mean value) and second (variance) order statistics, and the root Allan variance parameters of noise [15,16]. The parameters related to the first and second order statistics of noise can also be estimated by means of a short static acquisition (the minimum length of each acquisition is defined by IEEE standard for each sensor). These short static acquisitions can be performed simply using a plastic cube, where the device can be properly secured and then each of the three sensors' coordinate axes x, y and z are in turn aligned with the direction of gravity (g) as well as its opposite direction (six combinations, Figure 2). The root Allan variance parameters are instead computed over a long static acquisition [17]. Typically, the acquisitions are performed over a period of 4-8 hours [15,16]. All the static acquisitions should be carried out at a constant temperature of 25°C. In comparison to a static acquisition, characterising the dynamic metrological performance of the sensors embedded in an IMU is less straightforward, since the metrological standards provided by IEEE describe a sequence of operations requiring an expensive and complex testing instrumentation. However, various alternatives have been proposed in the literature. The accuracy of a gyroscope can be quantified during a single-axis rotation by a known angle by computing the ideal angular velocity and comparing it to the average measured angular velocity [18,19]. This procedure should be performed using a rotation plate with a rotating speed comparable to what is encountered during human gait (~200 deg/s) (Figure 2).

[Figure 2 around here]

The tests described above will be performed on thirty-five different DynaPort MM+ devices deployed in the study. This will allow conformity with manufacturer indications to be verified, highlight the need for sensor recalibrations and provide benchmark standards for any device with equivalent sensing capacity. In turn, this will allow any device with an equivalent or superior solution to be used, in order

1  
2  
3 to facilitate broader adoption of validated algorithms and cope with a continuously changing hardware  
4 landscape.  
5  
6  
7  
8

## 9 **3.2 Protocol for Validation of the algorithms**

10 Several algorithms to detect the DMOs from a single device have been implemented according to agreed  
11 definitions [20] and based on existing literature. At this time, these algorithms are being concurrently  
12 validated using the approach described by Bonci et al. [6] using pre-existing datasets, which mostly  
13 include lab-based observations only. Following this selection process, the best performing algorithms  
14 will be assessed using the data captured with the protocol here described.  
15  
16  
17  
18

### 19 **3.2.1 Ethics and Dissemination**

20 This multi-centre study is sponsored and coordinated by The Newcastle upon Tyne Hospitals NHS  
21 Foundation Trust, UK. Participants will be recruited in five sites across Europe: Tel Aviv Sourasky  
22 Medical Center, Israel (ethics approval granted by the Helsinki Committee, Tel Aviv Sourasky Medical  
23 Center, Tel Aviv, Israel, 0551-19TLV), Robert Bosch Foundation for Medical Research, Germany  
24 (ethics approval granted by the ethical committee of the medical faculty of The University of Tübingen,  
25 647/2019BO2), University of Kiel, Germany (ethics approval granted by the ethical committee of the  
26 medical faculty of Kiel University, D438/18), The Newcastle upon Tyne Hospitals NHS Foundation  
27 Trust, UK and Sheffield Teaching Hospitals NHS Foundation Trust, UK (ethics approval granted by  
28 London – Bloomsbury Research Ethics committee, 19/LO/1507).  
29  
30  
31  
32  
33  
34  
35

36 As per the study register (ISRCTN, 12246987) the data collection was originally planned to start in  
37 April 2021 and last six months. The pandemic situation meant that the study started in July 2020 and is  
38 now planned to finish in September 2021. All experimental procedures are constantly monitored and  
39 revised as needed to ensure full compliance with COVID19-related health and safety measures and for  
40 safeguarding of both the study participants and the assessors. The data collected as part of this protocol  
41 will be made publicly available together with the algorithms used to process the data.  
42  
43  
44  
45

### 46 **3.2.2 Participants**

47 A convenience sample of 120 participants will be recruited via their clinical care team or research  
48 registers to represent the five disease cohorts (COPD, PD, MS, PFF, and CHF), as well as healthy older  
49 adults (HA). Twenty participants will be recruited for each cohort. Each cohort will be recruited across  
50 multiple sites to ensure generalisability (e.g. differing cultures and contexts). Inclusion and exclusion  
51 criteria, grouped by total cohort and disease cohort, are summarised in Table 2. Given the novelty of  
52 the data, rather than on a power calculation the sample size of 120 has been initially defined according  
53 to Consensus-based Standards for the selection of health Measurement Instruments guidelines for  
54 measurement properties (COSMIN [21]). This sample size, however, will be refined after 50% of the  
55  
56  
57  
58  
59  
60

data collection. Given the DMOs are measured at walking bout level and not at patient level, in this analysis we will use the effective number of walking bouts observed during the 2.5 hours to perform the power calculation. We will base this analysis on a desired ICC coefficient  $\geq 0.7$ , with Alpha=0.05 and Beta=0.9, and an aimed confidence interval of 0.1. Based on this review, more participants may be recruited.

All participants will give written informed consent prior to undergoing a clinic/laboratory-based session to record generic and disease-specific characteristics. This will include participant reported outcomes, assessments and medical notes review. The generic and cohort-specific clinical outcomes that will be collected are summarised in Table 3.

**Table 2** Inclusion and exclusion criteria adopted for the different disease cohorts

| Group      | Inclusion criteria                                                                                                                                                                                                                                                                                                                                                                                                                                                                                                                                                    | Exclusion criteria                                                                                                                                                                                                                                                                                                                                                                                         |
|------------|-----------------------------------------------------------------------------------------------------------------------------------------------------------------------------------------------------------------------------------------------------------------------------------------------------------------------------------------------------------------------------------------------------------------------------------------------------------------------------------------------------------------------------------------------------------------------|------------------------------------------------------------------------------------------------------------------------------------------------------------------------------------------------------------------------------------------------------------------------------------------------------------------------------------------------------------------------------------------------------------|
| All groups | <ul style="list-style-type: none"> <li>-able to walk 4 meters independently with or without walking aids</li> <li>-able to give informed consent</li> <li>-willingness to wear the sensor set-ups during the study</li> <li>-shoe size 36 EU (3 UK) or above</li> <li>-able to read and write in first language of the respective country</li> <li>-Montreal Cognitive Assessment (MoCA) &gt;15 [22]</li> <li>-available for home /office visit during study period</li> </ul>                                                                                        | <ul style="list-style-type: none"> <li>-occurrence of any of the following 3 months prior to inclusion: myocardial infarction, hospitalisation for unstable angina, stroke, coronary artery bypass graft, percutaneous coronary intervention, implantation of a cardiac resynchronisation therapy device</li> <li>-current medical condition that could interfere with the patient's compliance</li> </ul> |
| COPD       | <ul style="list-style-type: none"> <li>- <math>\geq 45</math> years of age</li> <li>-Diagnosis of COPD (post-bronchodilator forced expiratory volume in the first second (FEV<sub>1</sub>) to forced vital capacity (FVC) ratio &lt;0.70)</li> <li>-clinical stability, defined as at least 4 weeks without antibiotics and/or oral corticosteroids to treat either a moderate or severe exacerbation</li> <li>- current or ex-smokers with a smoking history equivalent to at least 10 pack years (1 pack year = 20 cigarettes smoked per day for 1 year)</li> </ul> | <ul style="list-style-type: none"> <li>-having undergone major lung surgery (e.g., lung volume reduction, lung transplant)</li> <li>-having a lung tumour</li> <li>-primary respiratory diseases other than COPD (e.g., asthma)</li> <li>- impaired mobility related to non-COPD causes, as judged by the investigator</li> </ul>                                                                          |
| PD         | <ul style="list-style-type: none"> <li>-aged 18+ years</li> <li>-Diagnosis of PD according to the Movement Disorders Society criteria [23]</li> </ul>                                                                                                                                                                                                                                                                                                                                                                                                                 | <ul style="list-style-type: none"> <li>-impaired mobility related to non-PD causes, as judged by the investigator</li> </ul>                                                                                                                                                                                                                                                                               |
| MS         | <ul style="list-style-type: none"> <li>-aged 18+ years</li> <li>-Diagnosis of MS based on the revised McDonald's criteria</li> </ul>                                                                                                                                                                                                                                                                                                                                                                                                                                  | <ul style="list-style-type: none"> <li>-impaired mobility related to non-MS causes, as judged by the investigator</li> </ul>                                                                                                                                                                                                                                                                               |

|     |                                                                                                                                                                                                                                |                                                                                                             |
|-----|--------------------------------------------------------------------------------------------------------------------------------------------------------------------------------------------------------------------------------|-------------------------------------------------------------------------------------------------------------|
| PFF | -65+ years of age<br>-surgical treatment (fixation or arthroplasty) for a low-energy fracture of the proximal femur (ICD*-10 diagnosis S72.0, S72.1, S72.2) as diagnosed on X-rays of the hip and pelvis within last 12 months | -impaired mobility related to non-PFF causes, as judged by the investigator                                 |
| CHF | - ≥45 years of age<br>-Diagnosis of chronic heart failure with a grading of II-IV of the New York Heart Association (NYHA) Classification                                                                                      | - history of COPD ≥GOLD III<br>- impaired mobility related to non-CHF causes, as judged by the investigator |
| HA  | 65+ years of age                                                                                                                                                                                                               |                                                                                                             |
|     | *ICD, International Classification of Disease                                                                                                                                                                                  |                                                                                                             |

**Table 3** Generic and cohort-specific clinical outcomes.

| Cohort | Generic Outcomes                                                                                                                                                                                                                                                                                                                                                                                                                                                                                                                                                                                                                                                                 |
|--------|----------------------------------------------------------------------------------------------------------------------------------------------------------------------------------------------------------------------------------------------------------------------------------------------------------------------------------------------------------------------------------------------------------------------------------------------------------------------------------------------------------------------------------------------------------------------------------------------------------------------------------------------------------------------------------|
| All    | <ul style="list-style-type: none"> <li>- Descriptive measures (age, sex, living arrangements, education)</li> <li>- Anthropometric measures (height, mass, shoe size, waist width)</li> <li>- Health status (comorbidities, number of falls and injuries in the 12 months prior to assessment, walking aid usage and current medication)</li> <li>- Montreal Cognitive Assessment to evaluate global cognition [22]</li> <li>- Visual Analogue Scale to measure pain during walking (0-10, from no pain to worse pain possible)</li> <li>- Function component of the Late-Life Function and Disability Instrument (LLFDI) to evaluate function and disability [24,25]</li> </ul> |
| Cohort | Cohort-specific clinical outcomes                                                                                                                                                                                                                                                                                                                                                                                                                                                                                                                                                                                                                                                |
| PD     | <ul style="list-style-type: none"> <li>- Movement Disorder Society (MDS)-sponsored revision of the Unified Parkinson's Disease (PD) Rating Scale (UPDRS), motor part [26]</li> </ul>                                                                                                                                                                                                                                                                                                                                                                                                                                                                                             |
| MS     | <ul style="list-style-type: none"> <li>- Expanded Disability Status Scale (EDSS)* [27]</li> </ul>                                                                                                                                                                                                                                                                                                                                                                                                                                                                                                                                                                                |
| COPD   | <ul style="list-style-type: none"> <li>- 6-minute walk test</li> <li>- Recent spirometry test obtained from medical notes to characterise lung function*</li> <li>- COPD Assessment Test™ (CAT) [28]</li> </ul>                                                                                                                                                                                                                                                                                                                                                                                                                                                                  |
| PFF    | <ul style="list-style-type: none"> <li>- Short Physical Performance Battery (SPPB) – quiet standing balance task, a five times chair-raise test, and a 4m walk test at preferred gait speed</li> </ul>                                                                                                                                                                                                                                                                                                                                                                                                                                                                           |
| CHF    | <ul style="list-style-type: none"> <li>- 6-minute walk test</li> <li>- Kansas City Cardiomyopathy Questionnaire (KCCQ) * [29]</li> </ul>                                                                                                                                                                                                                                                                                                                                                                                                                                                                                                                                         |

\* denotes measures obtained from medical records if completed within 6 months prior to assessment



### 3.2.3 Patient and Public Involvement

Patient and Public involvement and engagement (PPIE) has informed the design and conduct of this study. The protocol and patient facing documents were reviewed and changes implemented based upon reviewer feedback. We will work with our Patient Advisory Group (with members representing the patient cohorts involved in the study) to review study findings, data interpretation and study reporting and dissemination, including co-design and presentation of dissemination materials for patients and the public. The learnings derived from these activities will further inform the work of the wider Mobilise-D project.

### 3.2.4 Experimental protocol

Performance of algorithms to determine walking-related DMOs is mostly affected by three factors: (i) the type of motor task (e.g., slow as opposed to fast, straight as opposed to curvilinear or inclined walking, etc.), (ii) the population of interest (e.g., healthy vs pathological gait), (iii) the context of observation (e.g., home vs outdoors). To accommodate these factors, we have developed a comprehensive, multi-stage protocol that includes a variety of tests conducted both in a laboratory context and in the real world (Table 4).

**Table 4** Summary of the experimental protocol used for the validation of the algorithms in the laboratory and in the real world. INDIP= INertial module with DIstance Sensors and Pressure insoles.

| Context of assessment  | Reference Systems            | Tested device | Mobility Tasks                                                     |
|------------------------|------------------------------|---------------|--------------------------------------------------------------------|
| Laboratory             | Stereophotogrammetry         | DynaPort MM+  | Structured mobility tasks and daily living activities              |
|                        |                              | INDIP         |                                                                    |
| Real world (2.5 hours) | INDIP                        | DynaPort MM+  | Unsupervised real-world activities (including predetermined tasks) |
|                        | Mobile Phone with Aeqora App |               |                                                                    |
|                        | Beacon                       |               |                                                                    |
| Real world (7 days)    | Mobile Phone with Aeqora App | DynaPort MM+  | Unsupervised daily living                                          |
|                        | Beacon                       |               |                                                                    |

### a. Laboratory based assessment

Laboratory-based observations will be used to quantify validity and consistency within and between groups and different types of walking tasks under controlled ideal conditions. Structured and task-based mobility activities and a simulated daily activity session, mimicking habitual movements performed at home or at work will be included. The outcome of this comparison will provide the level of highest expected accuracy and minimum detectable changes for a given DMO.

#### *Measurement tools*

##### *Reference system*

A stereophotogrammetric (SP) system (100Hz) will be used as the gold standard in structured and simulated tests of daily activities to validate the DMOs calculated from the DynaPort MM+ raw data. SP systems provide a measurement of the instantaneous position of points in a 3D measurement volume, by means of a set of cameras, each of which can capture the 2D trajectories of markers that are attached to the object of interest. The trajectory reconstructions are affected by systematic and random instrumental errors, normally minimised to a few millimetres via ad hoc calibration procedures and filtering and smoothing techniques [30].

To ensure quality and consistency in the SP data collection, accommodating different SP systems across sites, a spot check designed following the methodology proposed by Di Marco et al. [31] will be used, which will establish the specific level of accuracy for each system. A graphical user interface (GUI) for automated pre-processing of the SP data will ensure consistency in associated procedures (labelling, gap filling, etc.).

A bespoke marker set will be adopted, including four markers on each foot for detecting the gait events and four markers on the lower back device to track the displacement of the DynaPort device (Figure 3).

[Figure 3 around here]

##### *Tested devices*

During this observation each participant will also be equipped with an additional multi-sensor system (INertial module with DIstance Sensors and Pressure insoles, INDIP) [32–34] and with the Dynaport MM+. The INDIP system (Figure 4) includes four inertial modules (one on the lower back, one on the non-dominant wrist and two on the feet), two distance sensors and two force-sensitive resistor pressure insoles including 16 force-resistive sensing elements (manufacturer 221e S.r.l., Italy). The INDIP has been designed to be used as a reference for real-world experiments, and in this phase of the protocol its performance will be validated against the SP system for the populations of interest. Spatio-temporal parameters will be estimated exploiting the sensors redundancy and implementing previously validated sensor fusion algorithms. Gait events will be detected using data from pressure insoles and inertial

sensors independently, and then combined to increase robustness and detection accuracy (missed and minimisation of extra events). Spatial variables will be computed from the inertial data of the feet using a Madgwick filter [35,36] combined with a zero-velocity update [37,38], subsequently velocity and displacement will be calculated using a direct and reverse approach [32,39–41]. The individual components of the INDIP system and the associated algorithms for the estimates of the DMOs have already been extensively validated in previous studies on various healthy and pathological cohorts [39,42,43]. The final assembled system in its fully synchronized configuration, developed to address the requirements of this study, is expected to perform equivalently and as such we can anticipate mean absolute percentage errors of 1% on the stride duration, between 2% and 3% in the estimate of the stride length. Preliminary results from in-lab validation showed percentage errors of about 2% for gait speed as estimated during continuous walking, including both straight and curvilinear portions [44].

[Figure 4 around here]

The lower back INDIP unit and the DynaPort MM+ will be rigidly attached to each other. The data from the SP (100Hz), INDIP (IMU and insoles, 100Hz, Distance sensor, 50Hz) and DynaPort MM+ (100Hz) systems will be synchronised using a hardware-based approach for the SP and the INDIP system, and timestamps to align recordings from the INDIP and the DynaPort MM+.

### Mobility tasks

#### *Structured Mobility Tasks*

*Straight Walking:* Straight walking is the most common test of walking. [45,46] The participant walks for a distance of 5m from a standing start and will be repeated at three different walking speeds: preferred, fast and slow (Figure 5 A).

*Timed Up and Go (TUG):* The TUG is a widely used clinical assessment of a person's mobility [47]. The participant is asked to sit in a chair, stand up, walk 3 m in a straight line, make a 180° turn, walk back to the chair, turn and sit down (Figure 5 B).

*L Test:* The participant is asked to sit in a chair, stand up, walk straight, turn 90° to the left around a cone, walk straight to the second cone, make a 180° turn to the left, walk straight before making a final 90° turn to the right and return to the chair to sit down (Figure 5 C). Besides being a clinically validated test, [48] the main purpose of including this test is the variation in curvilinear walking and the inclusion of different types of turns.

Two novel additional tests were also included to simulate confounding factors that could be encountered in the real world:

*Surface Test:* The participant walks around a defined circuit by turning around the cones (Figure 5 D). The circuit is completed twice, creating the longest walking bout out of all the tasks (approx. 20m).

*Hallway Test:* The participant walks along a 6m walkway stepping up and down a step positioned in the walkway. At the end of the walkway, the participant will complete a sharp 180° turn and walk back

1  
2  
3 along the walkway (again stepping up and down off the step) until reaching the end point of the test  
4 (Figure 5 E).  
5

6 [Figure 5 around here]  
7  
8

9  
10 *Daily living activities*

11 These lab-based tasks will be used to simulate daily activities expected in the real life, similar to  
12 previous studies [49]. The participant starts by sitting in chair one and then executes a series of daily  
13 living tasks while moving around the room (see Figure 5F and G).  
14

15 Patients will be given regular opportunities for rest periods and will be asked to communicate if they  
16 require any additional breaks or would like to stop the assessment at any point. Use of arm rests for the  
17 TUG, L-Test and SDA, as well as handrails for the hallway test are permitted when needed.  
18  
19  
20  
21

22  
23 **b. Real - world validation (2.5 hours observation)**

24 This phase of the protocol will quantify validity and consistency across individuals and different types  
25 of walking tasks in the real world. It will be performed in a habitual environment  
26 (home/work/community/outdoor) chosen by the participants, without specific restrictions. The duration  
27 of the observation has been established as a trade-off between experimental, clinical and technical  
28 requirements.  
29  
30  
31  
32

33  
34 *Measurement tools*

35 *Reference systems*

36 Participants will be asked to wear the INDIP, which in this phase of the protocol will be used as a  
37 reference system for the quantification of the DMOs provided by the single sensor algorithms, as  
38 applied to the DynaPort MM+ data.  
39

40 In order to quantify the effects of contextual confounding factors, the participants will also be provided  
41 with a system detecting outdoors walking, gradient of descent/ascent (walking uphill/downhill). The  
42 system is developed as a mobile Android application (Aeqora app) and the device selected was a  
43 Samsung S9 with Android 10. The app is composed of three parts: (i) the core tracker, (ii) the interface  
44 and (iii) the server infrastructure collecting data across users. The core tracker, adapted from a library  
45 developed by the University of Sheffield [50], utilises the mobile phone's internal sensors to compute  
46 the type of activity (e.g., walking) and intensity (e.g., cadence) to identify geo-located bouts of  
47 movement. It operates in the background and senses mobility features through a range of sensors (e.g.,  
48 step counters, activity recognition, accelerometer, gyroscope, etc.) as well as from location services  
49 (GPS, network, Bluetooth, etc.). It collects the data and stores the raw sensor data into a local database  
50 in real time. A set of mechanisms have been developed to control access to this data, keep it secure, and  
51 regulate its use. First, no user identity information is sent within a single request as a token identifier is  
52  
53  
54  
55  
56  
57  
58  
59  
60

1  
2  
3 used. Additionally, a security layer is built based on Secure Socket Layer (SSL) and Transport Layer  
4 Security (TLS) 3.0 protocol to the data with scalable and efficient encryption algorithms. An SSL/TLS  
5 certificate is issued and used to establish identity and trust between server and client apps (desktop and  
6 mobile), ensuring privacy and security whenever communicating sensitive data.  
7

8  
9 Data collected during the experiments will be sent to a cluster of servers that uses algorithms to integrate  
10 the phone's data with contextual information about the locations where the participant will walk: where  
11 possible walks will be matched to OpenStreetMap [51] roads and paths, to remove GPS noise, the slope  
12 variation of each walk is computed on tiles, with a resolution of 5m within the UK (using Ordnance  
13 Survey Terrain 5) [52] and 30m in the other locations (using NASA's Shuttle Radar Topography  
14 Mission (SRTM) data [53], indoors and outdoors walking is recognised. Moreover, weather is  
15 associated with participant location based on the most proximate weather station.  
16

17  
18 The use of walking aids will also be monitored in this phase. For this purpose, a Bluetooth beacon  
19 (BlueBeacon Tag, BlueUp) will be attached to the walking aid and its activity will be detected by the  
20 phone's mobile tracker and saved by the app. The distance between the phone and the Beacon and data  
21 from the accelerometer contained in the Beacon will be integrated to determine when the aid is in use.  
22

23  
24 The above contextual factors and the use of walking aids will be included in the analyses to determine  
25 the extent to which they affect variation in the DMOs, although the degree of correlation will be  
26 adversely affected by the issues in accurately measuring context that are associated with missing data  
27 and GPS accuracy.  
28

### 29 Mobility Tasks

30  
31 To capture the largest possible range of activities during this assessment, participants will be guided by  
32 the following list of activities to be included: if relevant for their chosen environment, rise from a chair  
33 and walk to another room; walk to the kitchen and make a drink; walk up and down a set of stairs (if  
34 possible); walk outdoors (if possible, for a minimum of two minutes); if walking outside, walk up and  
35 down an inclined path. No supervision or structure to how these tasks should be completed will be given  
36 to the participants.  
37

### 38 **c. Real - world validation: seven days monitoring**

39  
40 This observation will quantify the effects of device wearing time, hourly and daily fluctuations of  
41 DMO's, and contextual confounding factors (such as location of the walk, weather, type of housing,  
42 etc.).  
43

### 44 Measurement tools

45  
46 The participants will be asked to wear the DynaPort MM+, and to carry a mobile phone equipped with  
47 the Aequora App. Bluetooth beacons will also be used to track the use of walking aids. The participants  
48 will wear the Dynaport MM+ at all times (including at night). As this device is not waterproof, they  
49  
50  
51  
52  
53  
54  
55  
56  
57  
58  
59  
60

1  
2  
3 will be instructed to remove it for showering, bathing, using a sauna and swimming and reattach it  
4 afterwards. They will be asked to keep the mobile phone charged, switched on at all times and to carry  
5 it with them whenever possible, especially when leaving the house.  
6  
7

### 8 Mobility Tasks

9 Participants will be monitored continuously for seven days, without any specific instruction being  
10 provided, except for that of wearing the provided measurement tools.  
11  
12

### 13 **3.3 Assessment of participants' and assessors' experience**

14 This part of the study will evaluate the participants' and assessors' experience of using the monitoring  
15 device. For the participant's assessment, wear-time of the device during the 7 days monitoring will be  
16 collected as a primary measure of compliance. Following the period of the seven-day, free-living data  
17 collection, participants will complete two questionnaires to assess the acceptability of the device. The  
18 first is a 12-item questionnaire [54] investigating usability on a 5-point ordinal scale. The questions are  
19 simple and focus on the impact of using a wearable device on participants' feelings, comfort and the  
20 ease of use of the device. The second questionnaire is the Comfort Rating Scale, [55] a 6-item measure  
21 investigating the comfort of a wearable device on a 21-point ordinal scale from '0 – low agreement' to  
22 '20 – high agreement'.  
23  
24

25 A subset of participants from all recruiting sites and cohorts will complete a semi-structured interview  
26 (see supplementary file). For this qualitative part of the study, sampling will continue until saturation,  
27 i.e. until no additional learning is identified from the data. The interview will explore participants'  
28 opinions on the use of wearable devices and digital technology in healthcare, experiences of managing  
29 their condition, experiences of technology, and opinions on data privacy associated with the use of  
30 technology in healthcare. Additionally, participants will be asked about their experiences of using the  
31 device, including comfort, perceived usefulness and ease of use, barriers and facilitators, and any other  
32 usability experiences that they may have encountered. All interviews will be audio-recorded,  
33 transcribed verbatim and, where required, translated to English.  
34  
35

36 To assess the professionals' experience, assessors from each of the clinical sites will be asked to assess  
37 the usability of the device after completion of the data collection. They will be provided with three  
38 questionnaires: 1) The System Usability Scale [56] a commonly used, validated 10-item questionnaire  
39 that asks users to rate a device on a 5-point Likert scale from '1 strongly disagree' to '5 – strongly  
40 agree'. Questions focus on the ease of use of the device, and the integration of various functions within  
41 it; 2) The IBM Computer System Usability Questionnaire [57] (to assess the DynaPort MM+ software),  
42 is composed of 19 items and asks respondents to consider their interaction with a computer system on  
43 a 7-point Likert scale from the perspective of data collection; 3) A bespoke questionnaire designed  
44 specifically for the TVS to assess the acceptability and effectiveness of the training methods,  
45 procedures, and any other materials provided within the study. The questionnaire will ask respondents  
46 to rate their experiences on a 7-point Likert scale to determine whether any changes to the procedures  
47  
48  
49  
50  
51  
52  
53  
54  
55  
56  
57  
58  
59  
60

1  
2  
3 and materials are required, and whether training was effective in preparing assessors to implement the  
4 assessment protocol as planned.

5  
6 In addition, assessors will complete a semi-structured interview with the aim of exploring their  
7 experiences of the data collection process. Assessors will be asked about the use of the device (e.g.,  
8 ease of use, intuitiveness, data collection and download procedures, etc.), training and materials  
9 provided prior to the commencement of the study, and barriers and facilitators to using the device. The  
10 topic guide and open-ended questions allow for new areas of conversation to emerge. All interviews  
11 will be audio-recorded and transcribed verbatim.  
12  
13  
14  
15  
16

### 17 **3.4 Data management**

18 All data will be uploaded to a central platform "e-Science Central" (e-SC) [58] which provides data  
19 processing and storage functionality in accordance with principles of reproducible research. The  
20 underlying infrastructure complies with ISO 27000 standards for Information Security Management  
21 Systems and is hosted on Amazon Web Service secure services cloud platform. Data will be integrated  
22 on the platform by means of implementation of a standardised file nomenclature system. At point of  
23 capture, each file will be labelled in standardised format. For source data, we will adhere to principles  
24 defined by the US Food and Drug Administration [59] for making them attributable, legible,  
25 contemporaneous, original, and accurate (ALCOA+). In particular, we will use both web-based forms  
26 on e-SC and an application from ERT (partner in the project) to capture the electronic clinical outcome  
27 assessments (eCOAs). The e-SC forms provide storage of event data, and support for data validation  
28 and basic data entry and verification. Both e-SC and ERT systems employ error-handling at source  
29 which alert the assessors of incorrect data entry (e.g., min/max boundaries, required/optional fields).  
30 Data captured at source on paper will be copied, signed, and scanned, then uploaded to e-SC as a  
31 certified copy. The motion capture data will also be transferred to e-SC and stored in an unmodified  
32 form. These data will be either uploaded directly to e-SC via the e-SC portal or transferred via an  
33 Application Programming Interface (API). The algorithms being developed and benchmarked will be  
34 used to process these files and extract and store the DMOs.  
35  
36  
37  
38  
39  
40  
41  
42  
43  
44  
45  
46

### 47 **3.5 Data analysis plan**

#### 48 **3.5.1 Verification of the device**

49 Mean and standard deviation readings of the accelerometer, gyroscope, and magnetometer signals  
50 captured during static acquisition will be used to assess the reliability of the manufacturer sensor  
51 calibration and to detect the presence of abnormal spikes in the sensor signals. Data from long static  
52 acquisitions will be used to confirm the stability of sampling frequency, the duration of the battery, and  
53 to estimate the Allan deviation (bias instability) of the gyroscope readings over time. Errors of  
54  
55  
56  
57  
58  
59  
60

gyroscope readings will be assessed using mean and standard deviation of nominal, measured and relevant errors for angular velocity values during the dynamic acquisitions.

### 3.5.2 Validation of the algorithms

The data analysis will determine criterion validity (including selected performance metrics and criterion (concurrent) validity metrics of the primary (real world walking speed, RWS) and secondary DMOs listed in Table 5. Table 6 summarises the statistical tools that will be used to quantify each of the DMOs. All statistical analyses will be performed using the statistical analysis toolbox of Matlab R2018a. In all tasks and observations, continuous variables (e.g., cadence, real-walking-speed) will be summarised with descriptive statistics for the values obtained within walking bouts (mean and standard deviation). In addition, the mean, minimum, maximum, standard deviation, median, interquartile range (IQR) and Root Mean Square Error (RMSE) of DMOs over all available walking bouts will be presented. Categorical variables (e.g., laterality of initial contacts) will be summarised with frequency counts and percentages. Confidence Interval 95% (CI) will be provided for the Interclass Correlation Coefficients (ICC).

Using the gold standard as a reference, True Positives (TP), False Positives (FP), True Negatives (TN) and False Negatives (FN) will be identified for the DMOs identified from the single device using a cut-off tolerance window defined as a fixed interval of 0.5 seconds [60] and centred on each event detected by the reference system. The following performance metrics will then be calculated:

$$\text{Sensitivity} = \frac{TP}{TP + FN}$$

$$\text{Positive Predicted Value} = \frac{TP}{TP + FP}$$

$$\text{Accuracy} = \frac{TP + TN}{TP + TN + FP + FN}$$

$$\text{Specificity} = \frac{TN}{TN + FP} \text{ and}$$

$$\text{F1 score} = 2 * \frac{\text{Positive Predicted Value} * \text{Sensitivity}}{\text{Positive Predicted Value} + \text{Sensitivity}}$$

Criterion validity will be characterised by evaluating the absolute and relative errors, defined as the relative and absolute differences between the DMOs quantified with the single device and those derived from the reference systems:

$$\text{Relative error} = \left( \frac{\text{DMO estimated by IMU} - \text{DMO estimated by Reference System}}{\text{DMO estimated by RS}} \right) \times 100$$

$$\text{Absolute Error (DMO)} = |\text{DMO estimated by IMU} - \text{DMO estimated by Reference System}|$$



1  
2  
3 The mean, standard deviation and maximum of all errors will be reported for each walking bout. Limits  
4 of agreement between single sensor and reference system DMOs will be quantified. In addition,  
5 statistically significant differences between the DMOs quantified by the IMU and those by the reference  
6 system, parametric (paired t-test) or non-parametric (Wilcoxon signed-rank test) tests will be performed  
7 depending on the normality of the distribution of the DMOs. Data distribution will be visually inspected  
8 with histograms, and normality tested with the Shapiro-Wilk test.  
9

10  
11  
12 Concurrent validity between the DMOs quantified by the single device and those derived from the  
13 reference systems will be evaluated by quantifying the Intraclass Correlation Coefficient (ICC (2,1)).  
14

15 All results will be presented separately by cohort (e.g., PD) and subgroup (i.e., subgroups of the cohorts)  
16 stratified by average stride gait speed (e.g., fast speed: walking speed > 1 m/s, medium speed: walking  
17 speed between 0.5m/s and 1 m/s, slow speed: walking speed < 0.5 m/s) [2].  
18

19 If participants missed data from one assessment (e.g., one of the tasks in the laboratory) or observation  
20 (e.g., 2.5hs), their remaining available data will still be included in the analyses. Assuming that data are  
21 missing completely at random, a complete case approach will be used to handle missing data [61].  
22  
23  
24  
25  
26  
27  
28  
29  
30  
31  
32  
33  
34  
35  
36  
37  
38  
39  
40  
41  
42  
43  
44  
45  
46  
47  
48  
49  
50  
51  
52  
53  
54  
55  
56  
57  
58  
59  
60

Table 5 List of digital mobility outcomes (primary and secondary DMOs) that will be analysed as part of the TVS.

| Variables                                                                                                                                                                                                            | DMOs (units)             | Definition                                                                                                         | DMO Attainable |           |       |            |
|----------------------------------------------------------------------------------------------------------------------------------------------------------------------------------------------------------------------|--------------------------|--------------------------------------------------------------------------------------------------------------------|----------------|-----------|-------|------------|
|                                                                                                                                                                                                                      |                          |                                                                                                                    | DynaPort MM+   | SP System | INDIP | Aeqora App |
| <b>Walking Bout (WB)</b><br><i>A walking sequence containing at least two consecutive strides of both feet. Start and end of a WB are determined by a resting period or any other activity (non-walking period).</i> | Number of WBs (count)    | Based on the identification of gait as an activity (yes/no) to a sample level of 0.1 s                             | ✓              | ✓         | ✓     | ✓          |
|                                                                                                                                                                                                                      | WB Start (s)             | Start of WB                                                                                                        | ✓              | ✓         | ✓     |            |
|                                                                                                                                                                                                                      | WB End (s)               | End of WB                                                                                                          | ✓              | ✓         | ✓     |            |
|                                                                                                                                                                                                                      | WB Duration (s)          | Time between start and the end of WB                                                                               | ✓              | ✓         | ✓     |            |
| <b>Stride/ Step Duration (SD)</b><br><i>Refers to the duration (time intervals) of strides, calculated as the time in between two non-consecutive (alternate) initial contacts.</i>                                  | Stride Duration (s)      | Duration between two non-consecutive (alternate) initial contact events                                            | ✓              | ✓         | ✓     |            |
|                                                                                                                                                                                                                      | Step Duration (s)        | Duration between two consecutive initial contact events                                                            | ✓              | ✓         | ✓     |            |
| <b>Cadence (CE)</b>                                                                                                                                                                                                  | Cadence (steps/minute)   | Steps performed within a minute                                                                                    | ✓              | ✓         | ✓     |            |
| <b>Stride Length (SL)</b>                                                                                                                                                                                            | Mean Stride Length (m)   | Average stride length within a WB                                                                                  | ✓              | ✓         | ✓     |            |
| <b>Real World Walking Speed (RWS)</b>                                                                                                                                                                                | Walking speed (m/s)      | Velocity, average stride speed within a WB                                                                         | ✓              | ✓         | ✓     | ✓          |
| <b>Turning</b>                                                                                                                                                                                                       | Number of Turns          | Overall number of turns performed in a WB based on the identification of turns (yes/no) to a sample level of 0.1 s | ✓              | ✓         | ✓     |            |
|                                                                                                                                                                                                                      | Turn Start (s)           | Start of each turn within the WB                                                                                   | ✓              | ✓         | ✓     |            |
|                                                                                                                                                                                                                      | Turn End (s)             | End of each turn within the WB                                                                                     | ✓              | ✓         | ✓     |            |
|                                                                                                                                                                                                                      | Turn Duration (s)        | Time between the start and the end of the turns within the WB                                                      | ✓              | ✓         | ✓     |            |
|                                                                                                                                                                                                                      | Maximal Turn Angle (deg) | Maximal angle achieved in the turn                                                                                 | ✓              | ✓         | ✓     |            |

|    |                                  |                                                                                                                               |                                                                                                                                                              |   |   |   |
|----|----------------------------------|-------------------------------------------------------------------------------------------------------------------------------|--------------------------------------------------------------------------------------------------------------------------------------------------------------|---|---|---|
| 1  |                                  |                                                                                                                               |                                                                                                                                                              |   |   |   |
| 2  |                                  |                                                                                                                               |                                                                                                                                                              |   |   |   |
| 3  | <b>Height Estimation</b>         | <b>Elevation Change (m)</b>                                                                                                   | <b>Difference between the minimal and maximal height or elevation for the complete walking bout detected for incline walking</b>                             | ✓ | ✓ | ✓ |
| 4  |                                  |                                                                                                                               |                                                                                                                                                              |   |   |   |
| 5  |                                  |                                                                                                                               |                                                                                                                                                              |   |   |   |
| 6  |                                  |                                                                                                                               |                                                                                                                                                              |   |   |   |
| 7  | <b>Left/Right Identification</b> | <b>Laterality (label)</b>                                                                                                     | <b>Left or Right category, indicating the foot with which the initial contact is performed</b>                                                               | ✓ | ✓ | ✓ |
| 8  |                                  |                                                                                                                               |                                                                                                                                                              |   |   |   |
| 9  |                                  |                                                                                                                               |                                                                                                                                                              |   |   |   |
| 10 |                                  | <b>Number of Final Contact Events (counts)</b>                                                                                | <b>Correct identification of Final Contact events</b>                                                                                                        | ✓ | ✓ | ✓ |
| 11 |                                  |                                                                                                                               |                                                                                                                                                              |   |   |   |
| 12 |                                  |                                                                                                                               |                                                                                                                                                              |   |   |   |
| 13 |                                  | <b>Final Contact Event (s)</b>                                                                                                | <b>Instant of time at which each final contact event is performed within a walking bout</b>                                                                  | ✓ | ✓ | ✓ |
| 14 |                                  |                                                                                                                               |                                                                                                                                                              |   |   |   |
| 15 |                                  |                                                                                                                               |                                                                                                                                                              |   |   |   |
| 16 |                                  | <b>Swing Phase Duration (s)</b>                                                                                               | <b>Time between the last contact of the current footfall and the first contact of the next footfall on the same foot</b>                                     | ✓ | ✓ | ✓ |
| 17 |                                  |                                                                                                                               |                                                                                                                                                              |   |   |   |
| 18 |                                  |                                                                                                                               |                                                                                                                                                              |   |   |   |
| 19 |                                  |                                                                                                                               |                                                                                                                                                              |   |   |   |
| 20 |                                  | <b>Stance Phase Duration (s)</b>                                                                                              | <b>Time in between the first contact and the last contact of two consecutive footfalls on the same foot</b>                                                  | ✓ | ✓ | ✓ |
| 21 | <b>Secondary Outcomes (SO)</b>   |                                                                                                                               |                                                                                                                                                              |   |   |   |
| 22 |                                  |                                                                                                                               |                                                                                                                                                              |   |   |   |
| 23 |                                  | <b>Variability of: Step Time, Stride Time, Swing Time, Stance Time Stride Velocity Stride Length (same units as variable)</b> | <b>St. Dev. and Coefficient of Variation of step time, of stride time, of swing time, of stance time, of stride velocity and stride length within a WB</b>   | ✓ | ✓ | ✓ |
| 24 |                                  |                                                                                                                               |                                                                                                                                                              |   |   |   |
| 25 |                                  |                                                                                                                               |                                                                                                                                                              |   |   |   |
| 26 |                                  |                                                                                                                               |                                                                                                                                                              |   |   |   |
| 27 |                                  |                                                                                                                               |                                                                                                                                                              |   |   |   |
| 28 |                                  |                                                                                                                               |                                                                                                                                                              |   |   |   |
| 29 |                                  |                                                                                                                               |                                                                                                                                                              |   |   |   |
| 30 |                                  | <b>Asymmetry of: Step Time, Stride Time, Swing Time, Stance Time (same units as variable)</b>                                 | <b>Asymmetry evaluated as difference between right and left steps or strides for step time, of stride time, of swing time and of stance time within a WB</b> | ✓ | ✓ | ✓ |
| 31 |                                  |                                                                                                                               |                                                                                                                                                              |   |   |   |
| 32 |                                  |                                                                                                                               |                                                                                                                                                              |   |   |   |
| 33 |                                  |                                                                                                                               |                                                                                                                                                              |   |   |   |
| 34 |                                  |                                                                                                                               |                                                                                                                                                              |   |   |   |
| 35 |                                  | <b>Location (label indoor/outdoor)</b>                                                                                        | <b>WB completed in an indoor or outdoor environment</b>                                                                                                      | ✓ |   | ✓ |
| 36 | <b>Contextual Factors</b>        |                                                                                                                               |                                                                                                                                                              |   |   |   |
| 37 |                                  | <b>Walking Aid (label yes/no)</b>                                                                                             | <b>Walking aid assistance during WB</b>                                                                                                                      | ✓ |   | ✓ |
| 38 |                                  |                                                                                                                               |                                                                                                                                                              |   |   |   |
| 39 |                                  |                                                                                                                               |                                                                                                                                                              |   |   |   |
| 40 |                                  |                                                                                                                               |                                                                                                                                                              |   |   |   |
| 41 |                                  |                                                                                                                               |                                                                                                                                                              |   |   |   |
| 42 |                                  |                                                                                                                               |                                                                                                                                                              |   |   |   |
| 43 |                                  |                                                                                                                               |                                                                                                                                                              |   |   |   |
| 44 |                                  |                                                                                                                               |                                                                                                                                                              |   |   |   |
| 45 |                                  |                                                                                                                               |                                                                                                                                                              |   |   |   |
| 46 |                                  |                                                                                                                               |                                                                                                                                                              |   |   |   |

**Table 6.** List of statistical analyses and performance metrics that will be used for the various digital mobility outcomes (DMOs). Performance metrics and criterion validity are those that will be used to compare DMOs obtained from a single device versus those obtained from the reference system. The types of plots listed in the table will be used to visualise performance metrics and to support interpretation of the results.

| DMO                     | PERFORMANCE METRIC |                           |          |             |          | CRITERION VALIDITY          |                   |                         |           |                           | PLOTS                  |                    |                    |                               |                 |
|-------------------------|--------------------|---------------------------|----------|-------------|----------|-----------------------------|-------------------|-------------------------|-----------|---------------------------|------------------------|--------------------|--------------------|-------------------------------|-----------------|
|                         | Sensitivity        | Positive Predictive Value | Accuracy | Specificity | F1-score | Error (absolute & relative) | SD & Max of Error | Root Mean Squared Error | Precision | Concurrent validity (ICC) | Significant Difference | Limit of Agreement | Bland Altman Plots | Scatter Plots for Correlation | Histogram Plots |
| Number of Walking Bouts | ✓                  | ✓                         | ✓        | ✓           | ✓        |                             |                   |                         |           |                           |                        |                    |                    |                               |                 |
| WB Start                |                    |                           |          |             |          | ✓                           | ✓                 | ✓                       | ✓         |                           |                        |                    | ✓                  | ✓                             | ✓               |
| WB End                  |                    |                           |          |             |          | ✓                           | ✓                 | ✓                       | ✓         |                           |                        |                    | ✓                  | ✓                             | ✓               |
| WB Duration             |                    |                           |          |             |          | ✓                           | ✓                 | ✓                       | ✓         | ✓                         | ✓                      | ✓                  | ✓                  | ✓                             | ✓               |
| Initial Contact Events  | ✓                  | ✓                         |          |             | ✓        |                             |                   |                         |           |                           |                        |                    |                    |                               |                 |
| Step Duration           |                    |                           |          |             |          | ✓                           | ✓                 | ✓                       | ✓         | ✓                         | ✓                      | ✓                  | ✓                  | ✓                             | ✓               |
| Stride Duration         |                    |                           |          |             |          | ✓                           | ✓                 | ✓                       | ✓         | ✓                         | ✓                      | ✓                  | ✓                  | ✓                             | ✓               |
| Final Contact Events    | ✓                  | ✓                         |          |             | ✓        |                             |                   |                         |           |                           |                        |                    |                    |                               |                 |
| Mean Stride Length      |                    |                           |          |             |          | ✓                           | ✓                 | ✓                       | ✓         | ✓                         | ✓                      | ✓                  | ✓                  | ✓                             | ✓               |
| Cadence                 |                    |                           |          |             |          | ✓                           | ✓                 | ✓                       | ✓         | ✓                         | ✓                      | ✓                  | ✓                  | ✓                             | ✓               |
| Elevation Change        |                    |                           |          |             |          | ✓                           | ✓                 | ✓                       | ✓         | ✓                         | ✓                      | ✓                  | ✓                  | ✓                             | ✓               |
| Walking Speed           |                    |                           |          |             |          | ✓                           | ✓                 | ✓                       | ✓         | ✓                         | ✓                      | ✓                  | ✓                  | ✓                             | ✓               |
| Number of Turns         | ✓                  | ✓                         | ✓        | ✓           | ✓        |                             |                   |                         |           |                           |                        |                    |                    |                               |                 |
| Turn Start              |                    |                           |          |             |          | ✓                           | ✓                 | ✓                       | ✓         |                           |                        |                    | ✓                  | ✓                             | ✓               |
| Turn End                |                    |                           |          |             |          | ✓                           | ✓                 | ✓                       | ✓         |                           |                        |                    | ✓                  | ✓                             | ✓               |
| Turn Duration           |                    |                           |          |             |          | ✓                           | ✓                 | ✓                       | ✓         | ✓                         | ✓                      | ✓                  | ✓                  | ✓                             | ✓               |
| Maximal Turn Angle      |                    |                           |          |             |          | ✓                           | ✓                 | ✓                       | ✓         | ✓                         | ✓                      | ✓                  | ✓                  | ✓                             | ✓               |
| Laterality              |                    |                           |          |             |          | ✓                           | ✓                 | ✓                       | ✓         | ✓                         |                        |                    |                    |                               |                 |
| Sequence Order          |                    |                           |          |             |          | ✓                           | ✓                 | ✓                       |           |                           |                        |                    |                    |                               |                 |

### 3.5.3 Participants' and assessors' experience

Participant and professional questionnaire data will be analysed using descriptive statistics. Interviews will be analysed using thematic analysis. [62] Transcripts will be deductively examined for the presence of themes related to the acceptability of the monitoring device to participants (i.e., comfort, interference with daily living) based on previous literature. Specifically, perceived usefulness, comfort, and ease of use are critical factors of usability thus, these will be the categories examined within the transcripts. Regarding participants use of technology to manage their healthcare condition an inductive approach will be taken. A list of codes relevant to the question will be generated and then refined by grouping them into potential themes.

#### Authors' contributions:

This study is part of a large collaborative initiative, evolving around the design and execution of the study here described. The complexity of the protocol and the highly multi-disciplinary content of the

1  
2  
3 study justifies the high number of authors that have been and will be involved in the different stages of  
4 its planning, conducting and in the design of the analysis plan.

5  
6 Manuscript initial drafting: CM, TB, SDD, AC, LA, AK, KS, SB, FC, LR. Design and deployment of  
7 experimental tools and protocols: KS, LS, CM, TB, EB, FC, NI, BS, LV, IV, EH, NC, FS. AC, MC,  
8 SB, LRO, AY, CK, EA, LS, CB, WM, CH, EW, JHA, EG, MB; J, MN, KT, BV, JHE, AK, DS, AM,  
9 VL. Data collection: LA, TB, PB, MB, EB, CF, EG, CH, EH, WM, CB, LP, LS, KS, BS, LVG, IV,  
10 AY, EW. Data analysis and algorithm development: SDD, EA, HS, AS, BE, FK, AK, MU, AC, JG,  
11 SK, LC, LP, LR, HH, EG. Draft revisions: LRO, KA, BE, JHA, BV, HS, AM, JHO, PB, FK, BC, AK,  
12 LC, LP, EB, KS, SK, LP, HH, WM, NC, BS, AI, IN, VL, SDD. Study design and coordination: CM,  
13 LRO, AM, SDD, AC. All authors have read and approved the final manuscript.

### 14 15 16 17 18 19 **Competing interests statement**

20  
21 Fabio Ciravegna is CEO and shareholder of Aeqora Ltd, of which Vitaveska Lanfranchi is director and  
22 shareholder. Henrik Sillén is an employee of AstraZeneca. Bjoern M Eskofier is co-founder and owns  
23 shares of Portables HealthCare Technologies GmbH. McRoberts is the manufacturer of the DynaPort.  
24 Martijn Niessen, Jordi Evers, and Lucas Plumgraaff are employees of McRoberts. Arne Mueller is an  
25 employee of Novartis and holds stock in Novartis. Lars Schwickert and Clemens Becker are consultants  
26 of Philipps Healthcare, Bosch Healthcare, Eli Lilly, Gait-up. Jeffrey M. Hausdorff reports having  
27 submitted a patent for assessment of mobility using wearable sensors in 400 Parkinson's disease; the  
28 intellectual property rights 401 are held by the Tel Aviv Medical Center. Luca Palmerini and Lorenzo  
29 Chiari are co-founders and own shares of mHealth Technologies.

### 30 31 32 33 34 35 **Funding**

36  
37 This study was co-funded by the European Union's Horizon 2020 research and innovation programme  
38 and EFPIA via the Innovative Medicine Initiative 2 (Mobilise-D project, grant number IMI22017-13-  
39 7-820820). The views expressed are those of the authors and not necessarily those of the IMI, the  
40 European Union, the EFPIA, or any Associated Partners. We acknowledge the support of Grünenthal  
41 GmbH via the funding of a PhD scholarship directly dedicated to the technical validation protocol.

42  
43 We acknowledge support from the Spanish Ministry of Science and Innovation through the "Centro de  
44 Excelencia Severo Ochoa 2019-2023" Program (CEX2018-000806-S), and support from the  
45 Generalitat de Catalunya through the CERCA Program.

46  
47 SDD, AJY and LR are also supported by the Newcastle Biomedical Research Centre (BRC) based at  
48 Newcastle upon Tyne and Newcastle University. CM, BS, LVG and EB are also supported by the  
49 Sheffield Biomedical Research Centre (BRC) based at the Sheffield Teaching Hospital and the  
50 University of Sheffield. The work was also supported by the NIHR/Wellcome Trust Clinical Research  
51 Facility (CRF) infrastructure at Newcastle upon Tyne Hospitals NHS Foundation Trust and the CRF at  
52 the Sheffield Teaching Hospital. The views expressed are those of the author(s) and not necessarily  
53 those of the NIHR or the Department of Health and Social Care or the funders.

## References

- 1 Team WHOD of MH and SA and WHO and WHOD of MH and SAMH and WHOMHE an. *Mental health atlas 2005*. World Health Organisation 2005.
- 2 Studenski S, Perera S, Patel K, *et al*. Gait Speed and Survival in Older Adults. *JAMA* 2011;**305**:50–8. doi:10.1001/jama.2010.1923
- 3 Perera S, Patel K V, Rosano C, *et al*. Gait Speed Predicts Incident Disability: A Pooled Analysis. *Journals Gerontol Ser A* 2016;**71**:63–71. doi:10.1093/gerona/glv126
- 4 Rochester L, Mazzà C, Mueller A, *et al*. A Roadmap to Inform Development, Validation and Approval of Digital Mobility Outcomes: The Mobilise-D Approach. *Digit Biomarkers* 2020;**4**:13–27. doi:10.1159/000512513
- 5 Del Din S, Godfrey A, Mazzà C, *et al*. Free-living monitoring of Parkinson’s disease: Lessons from the field. *Mov Disord* 2016;**31**:1293–313. doi:10.1002/mds.26718
- 6 Bonci T, Keogh A, Din S Del, *et al*. An objective methodology for the selection of a device for continuous mobility assessment. *Sensors (Switzerland)* 2020;**20**:1–16. doi:10.3390/s20226509
- 7 Gao Y, Li H, Luo Y. An empirical study of wearable technology acceptance in healthcare. *Ind Manag Data Syst* 2015;**115**:1704–23. doi:10.1108/IMDS-03-2015-0087
- 8 Jia Y, Wang W, Wen D, *et al*. Perceived user preferences and usability evaluation of mainstream wearable devices for health monitoring. *PeerJ* 2018;**2018**:1–17. doi:10.7717/peerj.5350
- 9 Puri A, Kim B, Nguyen O, *et al*. User acceptance of wrist-worn activity trackers among community-dwelling older adults: Mixed method study. *JMIR mHealth uHealth* 2017;**5**. doi:10.2196/mhealth.8211
- 10 Viceconti M, Penna SH, Dartee W, *et al*. Toward a regulatory qualification of real-world mobility performance biomarkers in parkinson’s patients using digital mobility outcomes. *Sensors (Switzerland)* 2020;**20**:1–13. doi:10.3390/s20205920
- 11 Mobilise-D website. <https://www.mobilise-d.eu/> (accessed 18 Feb 2021).
- 12 Bartlett JW, Frost C. Reliability, repeatability and reproducibility: Analysis of measurement errors in continuous variables. *Ultrasound Obstet Gynecol* 2008;**31**:466–75. doi:10.1002/uog.5256
- 13 Letter of support for Mobilise-D digital mobility outcomes as monitoring biomarkers. [https://www.ema.europa.eu/en/documents/other/letter-support-mobilise-d-digital-mobility-outcomes-monitoring-biomarkers\\_en.pdf](https://www.ema.europa.eu/en/documents/other/letter-support-mobilise-d-digital-mobility-outcomes-monitoring-biomarkers_en.pdf) (accessed 18 Feb 2021).

- 1  
2  
3  
4  
5 14 Systems M, Development S, Devices E. *IEEE Standard for Sensor Performance Parameter*  
6 *Definitions*. 2014.  
7  
8  
9 15 El-Sheimy N, Hou H, Niu X. Analysis and modeling of inertial sensors using allan variance.  
10 *IEEE Trans Instrum Meas* 2008;**57**:140–9. doi:10.1109/TIM.2007.908635  
11  
12 16 Hussen AA, Jleta IN. Low-Cost Inertial Sensors Modeling Using Allan Variance. *Int Sch Sci*  
13 *Res Innov* 2015;**9**:1069–74.  
14  
15  
16 17 IEEE Aerospace and Electronic Systems Society (institution). *IEEE Standard Specification*  
17 *Format Guide and Test Procedure for Single-Axis Laser Gyros*. 1995.  
18  
19 20 Ferraris F, Gorini I, Grimaldi U, *et al*. Calibration of three-axial rate gyros without angular  
21 velocity standards. *Sensors Actuators, A Phys* 1994;**42**:446–9. doi:10.1016/0924-  
22 4247(94)80031-6  
23  
24 25 Stančin S, Tomažič S. Time- and computation-efficient calibration of MEMS 3D  
26 accelerometers and gyroscopes. *Sensors (Switzerland)* 2014;**14**:14885–915.  
27 doi:10.3390/s140814885  
28  
29 30 Kluge F, Del Din S, Cereatti A, *et al*. Consensus based framework for digital mobility  
31 monitoring. *medRxiv*. 2021;**1**:12 .doi:https://doi.org/10.1101/2020.12.18.20248404  
32  
33 34 COSMIN. <https://www.cosmin.nl/> (accessed 18 Feb 2021).  
35  
36 37 Nasreddine ZS, Phillips NA, Bédirian V, *et al*. The Montreal Cognitive Assessment, MoCA: A  
38 Brief Screening Tool For Mild Cognitive Impairment. *J Am Geriatr Soc* 2005;**53**:695–9.  
39 doi:https://doi.org/10.1111/j.1532-5415.2005.53221.x  
40  
41 42 Postuma RB, Berg D, Stern M, *et al*. MDS clinical diagnostic criteria for Parkinson's disease.  
43 *Mov Disord* 2015;**30**:1591–601. doi:10.1002/mds.26424  
44  
45 46 Jette AM, Haley SM, Coster WJ, *et al*. Late Life Function and Disability Instrument: I.  
47 Development and Evaluation of the Disability Component. *Journals Gerontol Ser A*  
48 2002;**57**:M209–16. doi:10.1093/gerona/57.4.M209  
49  
50 51 Haley SM, Jette AM, Coster WJ, *et al*. Late Life Function and Disability Instrument: II.  
52 Development and Evaluation of the Function Component. *Journals Gerontol Ser A*  
53 2002;**57**:M217–22. doi:10.1093/gerona/57.4.M217  
54  
55 56 Goetz CG, Tilley BC, Shaftman SR, *et al*. Movement Disorder Society-sponsored revision of  
57 the Unified Parkinson's Disease Rating Scale (MDS-UPDRS): Scale presentation and  
58 clinimetric testing results. *Mov Disord* 2008;**23**:2129–70.  
59 doi:https://doi.org/10.1002/mds.22340  
60

- 1  
2  
3 27 Kurtzke JF. Rating neurologic impairment in multiple sclerosis. *Neurology* 1983;**33**:1444 LP –  
4 1444. doi:10.1212/WNL.33.11.1444  
5  
6  
7 28 Gupta N, Pinto LM, Morogan A, *et al.* The COPD assessment test: a systematic review. *Eur*  
8 *Respir J* 2014;**44**:873 LP – 884. doi:10.1183/09031936.00025214  
9  
10  
11 29 Green CP, Porter CB, Bresnahan DR, *et al.* Development and evaluation of the Kansas City  
12 Cardiomyopathy Questionnaire: a new health status measure for heart failure. *J Am Coll*  
13 *Cardiol* 2000;**35**:1245–55. doi:10.1016/S0735-1097(00)00531-3  
14  
15  
16 30 Chiari L, Della Croce U, Leardini A, *et al.* Human movement analysis using  
17 stereophotogrammetry: Part 2: Instrumental errors. *Gait & posture* 2005; **21**:197-211.  
18 doi:10.1016/j.gaitpost.2004.04.004  
19  
20  
21 31 Di Marco R, Rossi S, Castelli E, *et al.* Effects of the calibration procedure on the metrological  
22 performances of stereophotogrammetric systems for human movement analysis. *Meas J Int*  
23 *Meas Confed* 2017;**101**:265–71. doi:10.1016/j.measurement.2016.01.008  
24  
25  
26 32 Trojaniello D, Cereatti A, Croce U Della. Gait direction of progression changes using shank  
27 worn MIMUs. In: *GBN Conference, Pavia*. 2014.  
28  
29  
30 33 Salis F, Bertuletti S, Caruso M, *et al.* Multi-sensor integration and data fusion for enhancing  
31 gait assessment in and out of the laboratory. *Gait Posture* 2019;**74**:34.  
32 doi:10.1016/j.gaitpost.2019.07.493  
33  
34  
35 34 Bertuletti S, Della Croce U, Cereatti A. A wearable solution for accurate step detection based  
36 on the direct measurement of the inter-foot distance. *J Biomech* 2019;**84**:274–7.  
37 doi:https://doi.org/10.1016/j.jbiomech.2018.12.039  
38  
39  
40 35 Caruso, M.; Sabatini, A.M.; Laidig, D.; Seel, T.; Knaflitz, M.; Della Croce, U.; Cereatti, A.  
41 Analysis of the Accuracy of Ten Algorithms for Orientation Estimation Using Inertial and  
42 Magnetic Sensing under Optimal Conditions: One Size Does Not Fit All. *Sensors* 2021;**21**;  
43 2543. doi:10.3390/s21072543  
44  
45  
46  
47 36 Caruso M, Sabatini AM, Knaflitz M, *et al.* Accuracy of the Orientation Estimate Obtained  
48 Using Four Sensor Fusion Filters Applied to Recordings of Magneto-Inertial Sensors Moving  
49 at Three Rotation Rates. In: *2019 41st Annual International Conference of the IEEE*  
50 *Engineering in Medicine and Biology Society (EMBC)*. 2019;2053–8.  
51 doi:10.1109/EMBC.2019.8857655  
52  
53  
54  
55 37 Skog I, Nilsson J, Händel P. Evaluation of zero-velocity detectors for foot-mounted inertial  
56 navigation systems. In: *2010 International Conference on Indoor Positioning and Indoor*  
57 *Navigation*. 2010;1–6. doi:10.1109/IPIN.2010.5646936  
58  
59  
60



- 1  
2  
3 38 Peruzzi A, Della Croce U, Cereatti A. Estimation of stride length in level walking using an  
4 inertial measurement unit attached to the foot: A validation of the zero velocity assumption  
5 during stance. *J Biomech* 2011;**44**:1991–4. doi:10.1016/j.jbiomech.2011.04.035  
6  
7  
8  
9 39 Trojaniello D, Cereatti A, Pelosin E, *et al.* Estimation of step-by-step spatio-temporal  
10 parameters of normal and impaired gait using shank-mounted magneto-inertial sensors :  
11 application to elderly , hemiparetic , parkinsonian and choreic gait. 2014;**44**:152.  
12  
13 40 Köse A, Cereatti A, Della Croce U. Bilateral step length estimation using a single inertial  
14 measurement unit attached to the pelvis. *J Neuroeng Rehabil* 2012;**9**. doi:10.1186/1743-0003-  
15 9-9  
16  
17  
18 41 Trojaniello D, Cereatti A, Ravaschio A, *et al.* Assessment of gait direction changes during  
19 straight-ahead walking in healthy elderly and Huntington Disease patients using a shank worn  
20 MIMU. In: *2014 36th Annual International Conference of the IEEE Engineering in Medicine*  
21 *and Biology Society*. 2014. 2508–11. doi:10.1109/EMBC.2014.6944132  
22  
23  
24  
25 42 Betoli M, Cereatti A, Trojaniello D, *et al.* Estimation of spatio-temporal parameters of gait  
26 from magneto-inertial measurement units: multicenter validation among Parkinson, mildly  
27 cognitively impaired and healthy older adults. *Biomedical engineering online*. 2018  
28 Dec;**17**(1):1-4. doi:10.1186/s12938-018-0488-2  
29  
30  
31  
32 43 Rossaningo R, Caruso M, Salis F, *et al.* An Optimal Procedure for Stride Length Estimation  
33 Using Foot-Mounted Magneto-Inertial Measurement Units. *2021 IEEE International*  
34 *Symposium on Medical Measurements and Applications (MeMeA)* 2021 Jun 23 (pp. 1-6).  
35 IEEE., doi: 10.1109/MeMeA52024.2021.9478604.  
36  
37  
38  
39 44 Salis F, Bertuletti S, Caruso M, *et al.* A novel multi-sensor system for gait assessment in real-  
40 world conditions: preliminary results. In: *Proceedings of GNB 2020*. 2020.  
41  
42  
43 45 Zijlstra W, Hof AL. Assessment of spatio-temporal gait parameters from trunk accelerations  
44 during human walking. *Gait Posture* 2003;**18**:1–10. doi:https://doi.org/10.1016/S0966-  
45 6362(02)00190-X  
46  
47  
48 46 Ngueleu AM, Blanchette AK, Bouyer L, *et al.* Design and accuracy of an instrumented insole  
49 using pressure sensors for step count. *Sensors (Switzerland)* 2019;**19**:12–4.  
50 doi:10.3390/s19050984  
51  
52  
53 47 Nightingale CJ, Mitchell SN, Butterfield SA. Validation of the Timed Up and Go Test for  
54 Assessing Balance Variables in Adults Aged 65 and Older. *J Aging Phys Act*; **27**:230–3.  
55 doi:10.1123/japa.2018-0049 10.1123/japa.2018-0049  
56  
57  
58 48 Deathe AB, Miller WC. The L Test of Functional Mobility: Measurement Properties of a  
59  
60

- 1  
2  
3 Modified Version of the Timed “Up & Go” Test Designed for People With Lower-Limb  
4 Amputations. *Phys Ther* 2005;**85**:626–35. doi:10.1093/ptj/85.7.626  
5  
6  
7 49 Pham MH, Elshehabi M, Haertner L, *et al.* Validation of a Step Detection Algorithm during  
8 Straight Walking and Turning in Patients with Parkinson’s Disease and Older Adults Using an  
9 Inertial Measurement Unit at the Lower Back . *Front. Neurol.* .  
10 2017;**8**:457.https://www.frontiersin.org/article/10.3389/fneur.2017.00457  
11  
12  
13 50 Ciravegna F, Gao J, Ireson N, *et al.* Active 10: Brisk Walking to Support Regular Physical  
14 Activity. In: *Proceedings of the 13th EAI International Conference on Pervasive Computing*  
15 *Technologies for Healthcare*. New York, NY, USA: : Association for Computing Machinery  
16 2019. 11–20. doi:10.1145/3329189.3329208  
17  
18  
19  
20 51 Open Street Map. https://www.openstreetmap.org (accessed 18 Feb 2021).  
21  
22 52 Ordnance Survey Terrain 5. https://www.ordnancesurvey.co.uk/business-  
23 government/products/terrain-5 (accessed 18 Feb 2021).  
24  
25  
26 53 U.S. Releases Enhanced Shuttle Land Elevation Data. https://www2.jpl.nasa.gov/srtm/  
27 (accessed 18 Feb 2021).  
28  
29  
30 54 Rabinovich RA, Louvaris Z, Raste Y, *et al.* Validity of physical activity monitors during daily  
31 life in patients with COPD. *Eur Respir J* 2013;**42**:1205–15. doi:10.1183/09031936.00134312  
32  
33 55 Knight JF, Baber C, Schwirtz A, *et al.* The comfort assessment of wearable computers. *Proc -*  
34 *Int Symp Wearable Comput ISWC* 2002;**2002-Janua**:65–72. doi:10.1109/ISWC.2002.1167220  
35  
36  
37 56 Brooke J. SUS: a “quick and dirty” usability”. *Usability Eval Ind* 1196;**Jun 11**:189.  
38  
39 57 Lewis JR. IBM computer usability satisfaction questionnaires: Psychometric evaluation and  
40 instructions for use. *Int J Human-Computer Interact* 1995;**7**:57–78.  
41 doi:10.1080/10447319509526110  
42  
43  
44 58 Hiden H, Woodman S, Watson P, *et al.* Developing cloud applications using the e-Science  
45 Central platform. *Philos Trans R Soc A Math Phys Eng Sci* 2013;**371**.  
46 doi:10.1098/rsta.2012.0085  
47  
48  
49 59 Data Integrity and Compliance With CGMP. Guidance for Industry.  
50 https://www.fda.gov/files/drugs/published/Data-Integrity-and-Compliance-With-Current-  
51 Good-Manufacturing-Practice-Guidance-for-Industry.pdf (accessed 18 Feb 2021).  
52  
53  
54 60 Tietsch M, Muaremi A, Clay I, *et al.* Robust Step Detection from Different Waist-Worn  
55 Sensor Positions: Implications for Clinical Studies. *Digital biomarkers* 2020;**4**(1):50-8.  
56 doi:10.1159/000511611  
57  
58  
59 61 Kang H. The prevention and handling of the missing data. *Korean journal of anesthesiology*.

1  
2  
3 2013 May;64(5):402. doi:10.4097/kjae.2013.64.5.402  
4

- 5 62 Braun V, Clarke V. Using thematic analysis in psychology. *Qual Res Psychol* 2006;**3**:77–101.  
6 doi:10.1191/1478088706qp063oa  
7  
8  
9

## 10 11 **Figure legends**

12  
13  
14  
15 **Figure 1** – Concurrent domains to be assessed as part of a technical validation of digital mobility outcomes  
16 (DMOs) obtained from a wearable device.  
17

18  
19 **Figure 2** – Testing configurations used during (a) short static (plexiglass cube and device) and (b) dynamic  
20 (turntable and device) acquisitions. Marks (in red) are applied on both on the turntable and on the base to  
21 identify start/end, which have to align for the dynamic tests.  
22

23  
24 **Figure 3** – Illustration of the adopted marker set configuration. Markers were located on the right (RHEEL) and  
25 left (LHEEL) heels, toes (RTOE, LTOE) and on the INDIP units located on the right and left foot (RINDIP,  
26 LINDIP). Two additional reference markers were asymmetrically attached to the side of the foot to favour  
27 automatic recognition (RREF, LREF). Four additional markers were located on the DynaPort MM+ sensor  
28 (DYNAY, DYNAO, DYNAX, DYNAREF).  
29  
30

31  
32 **Figure 4** –Different components of the INDIP system. The figure on the left shows the pressure insoles and the  
33 connectors that link them to the distance sensors and the inertial modules. The picture on the right shows how  
34 the same system is then attached to the participant's foot and leg.  
35  
36

37  
38 **Figure 5** – Diagrams of the selected tasks: (A) Straight Walking Test, (B) Timed Up and Go, (C) L-Test, (D)  
39 Surface Test, (E) Hallway Test, (F) Schematic of the Daily living activities, (G) Description of the eight tasks  
40 performed during the Daily Living activities.  
41  
42  
43  
44  
45  
46  
47  
48  
49  
50  
51  
52  
53  
54  
55  
56  
57  
58  
59  
60

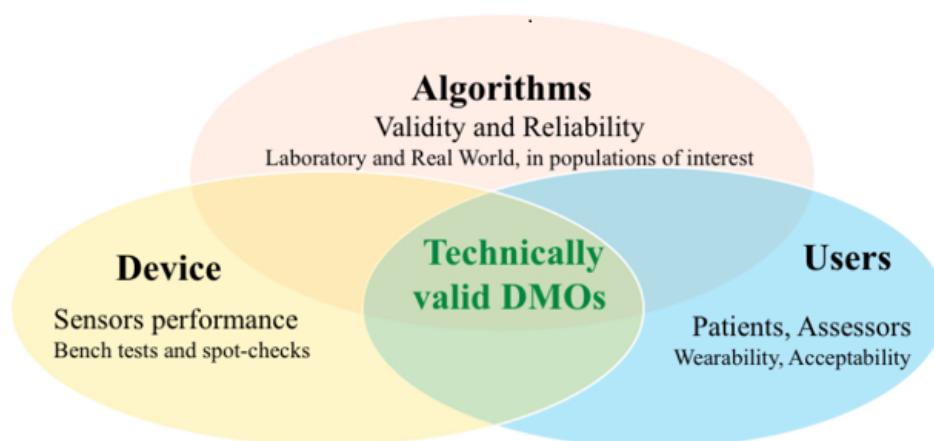

Concurrent domains to be assessed as part of a technical validation of digital mobility outcomes (DMOs) obtained from a wearable device.

1  
2  
3  
4  
5  
6  
7  
8  
9  
10  
11  
12  
13  
14  
15  
16  
17  
18  
19  
20  
21  
22  
23  
24  
25  
26  
27  
28  
29  
30  
31  
32  
33  
34  
35  
36  
37  
38  
39  
40  
41  
42  
43  
44  
45  
46  
47  
48  
49  
50  
51  
52  
53  
54  
55  
56  
57  
58  
59  
60

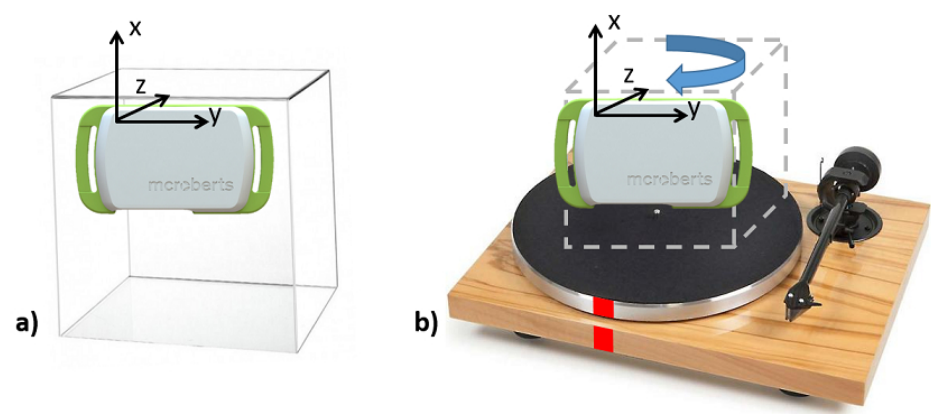

Testing configurations used during (a) short static (plexiglass cube and device) and (b) dynamic (turntable and device) acquisitions. Marks (in red) are applied on both on the turntable and on the base to identify start/end, which have to align for the dynamic tests.

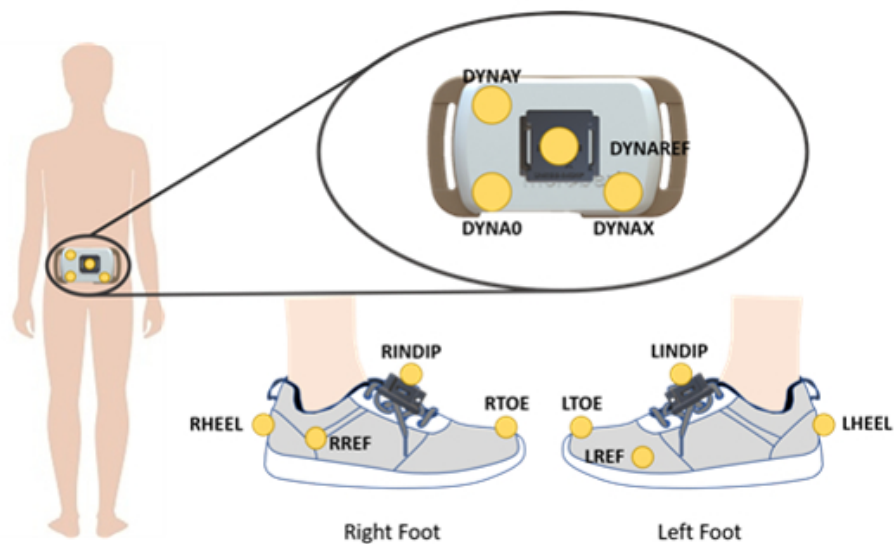

Illustration of the adopted marker set configuration. Markers were located on the right (RHEEL) and left (LHEEL) heels, toes (RTOE, LTOE) and on the INDIP units located on the right and left foot (RINDIP, LINDIP). Two additional reference markers were asymmetrically attached to the side of the foot to favour automatic recognition (RREF, LREF). Four additional markers were located on the DynaPort MM+ sensor (DYNAY, DYNAO, DYNAX, DYNAREF).

1  
2  
3  
4  
5  
6  
7  
8  
9  
10  
11  
12  
13  
14  
15  
16  
17  
18  
19  
20  
21  
22  
23  
24  
25  
26  
27  
28  
29  
30  
31  
32  
33  
34  
35  
36  
37  
38  
39  
40  
41  
42  
43  
44  
45  
46  
47  
48  
49  
50  
51  
52  
53  
54  
55  
56  
57  
58  
59  
60

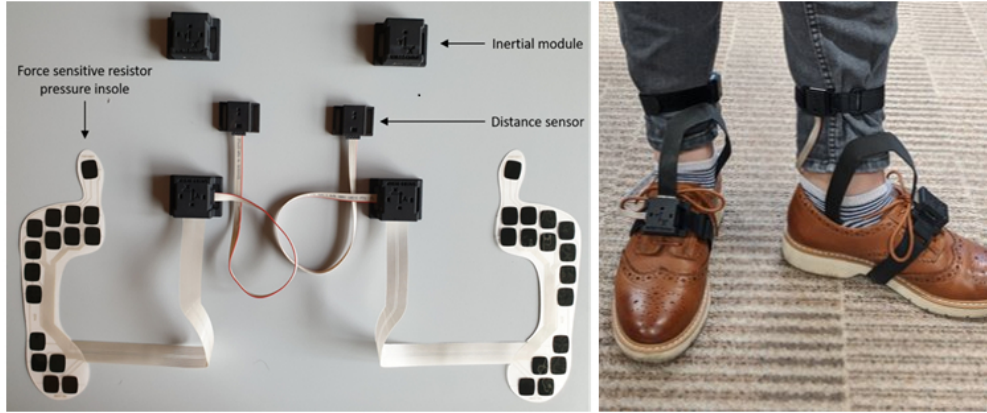

Different components of the INDIP system. The figure on the left shows the pressure insoles and the connectors that link them to the distance sensors and the inertial modules. The picture on the right shows how the same system is then attached to the participant's foot and leg.

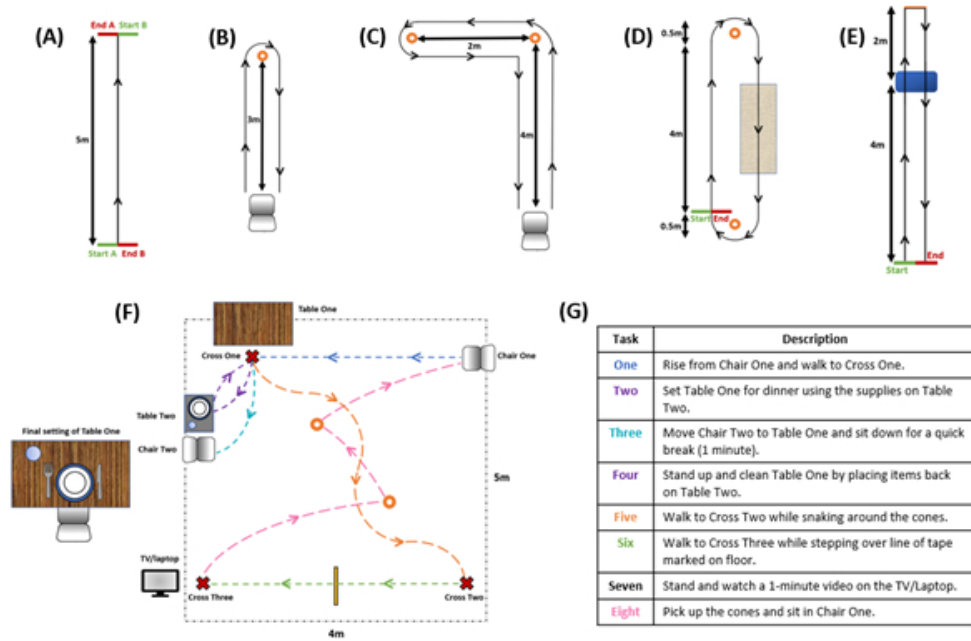

Diagrams of the selected tasks: (A) Straight Walking Test, (B) Timed Up and Go, (C) L-Test, (D) Surface Test, (E) Hallway Test, (F) Schematic of the Daily living activities, (G) Description of the eight tasks performed during the Daily Living activities.

159x102mm (96 x 96 DPI)



## Mobilise-D Technical Validation Study

### Participant interview topic guide

#### Interview guide

**Note:** Questions in this topic guide are included to answer the above aims. If the participant is open and talks freely, they may answer some of the questions without being asked. Therefore, depending on the person, not all of these questions need to be asked. If they begin to talk about topics that may be interesting or relevant to the above aims, please feel free to continue to explore these, even if there is no specific question linked to it. In contrast, if participants are not very open, some potential prompts have been included with the questions below. These prompts are there as an optional guide and do not need to be used.

#### Dynaport questions

Aim: Ensure that the McRoberts Dynaport device is comfortable and acceptable to participants

#### Main questions

- 1 Can you describe your experience of using the Dynaport sensor in the last week?
- 2 Can you tell me what you liked about the device? Disliked?
  - Prompts if needed*
  - Size/weight
  - Attachment to body
  - Ease of use
  - Comfort
- 3 How did the device make you feel? / Can you describe what it felt like to wear the device?
  - Prompts if needed*
  - In social environments/at home
  - Interaction with daily activities
  - Emotions associated with being monitored
- 4 What you change about the device if you could?

#### Follow-up questions

"If you don't mind, I'd like to ask you some specific details about the device."

- 1 How did you find the process of putting it on and taking it off?
- 2 How did the device influence your daily activities?
  - Prompts if needed*
  - How were they impacted?

- How did this make them feel?

3 Can you tell me about any difficulties that you had with the device?

4 How did you feel about wearing the device for a week?

*Prompts if needed*

- How would they feel if it was longer?
- Any concerns for the week?

---

### Closing question

1 Is there anything else you would like me to know about the Dynaport?

---

### The use of wearable devices in healthcare questions

Aim: Explore the acceptability of wearable devices, for the purposes of healthcare monitoring, to participants in general.

### Main questions

1 Can you tell me about your experience of your health condition?

*Note:* Condition specific symptoms are listed at the end of this document.

2 Can you tell me about your experience of the care you've received for your condition?

*Prompts if needed*

- How do they feel about it?

3 Can you tell me about what sort of technology you currently use in your everyday life?

*Prompts if needed*

- How do you feel about using technology?
- What would make you use technology more? Less?
- Emotions associated with being monitored

4 What are your opinions on the use of technology in healthcare?

*Prompts if needed*

- What do you think it can be used for?

5 How would you feel about using technology to generate health information about yourself? (e.g. condition related smartphone app, self-reported outcomes platform, fitness tracker etc.),

*Prompts if needed*

- Why?
  - What would make you use it?
  - What would stop you from using it?
-

- What would need to change for you to use it?

### Follow-up questions

1 How do you feel about capturing health information in your daily life, using a wearable remote monitoring device?

2 How do you think digital technology used in your daily life would influence how you manage your condition?

*Prompts if needed*

- How would it impact their relationship with their health care provider?
- Integration into activities of daily living

3 How would you feel about sharing this data with your health care provider? What about researchers?

*Prompts if needed*

- Usefulness
- Impact of this

### Closing question

1 Is there anything else you would like me to know about using technology in healthcare?

## Researcher feedback

### Questionnaires

#### The System Usability Scale

To be completed by researchers who have collected data using the McRoberts device. When answering these questions please consider how you personally have found the McRoberts device, not how the participants have found it.

|                                                          | 1<br>strongly<br>disagree | 2 | 3 | 4 | 5<br>strongly<br>agree |
|----------------------------------------------------------|---------------------------|---|---|---|------------------------|
| I think that I would like to use this system frequently. |                           |   |   |   |                        |
| I found the system unnecessarily complex.                |                           |   |   |   |                        |
| I thought the system was easy to use.                    |                           |   |   |   |                        |

|                                                                                            |  |  |  |  |  |
|--------------------------------------------------------------------------------------------|--|--|--|--|--|
| I think that I would need the support of a technical person to be able to use this system. |  |  |  |  |  |
| I found the various functions in this system were well integrated.                         |  |  |  |  |  |
| I thought there was too much inconsistency in this system.                                 |  |  |  |  |  |
| I would imagine that most people would learn to use this system very quickly.              |  |  |  |  |  |
| I found the system very cumbersome to use.                                                 |  |  |  |  |  |
| I felt very confident using the system.                                                    |  |  |  |  |  |
| I needed to learn a lot of things before I could get going with this system.               |  |  |  |  |  |
| I think that I would like to use this system frequently.                                   |  |  |  |  |  |

**The IBM Computer System Usability Questionnaire**

To be completed by researchers who have collected data using the McRoberts device. When answering these questions please consider how you personally have found the McRoberts device, not how the participants have found it.

|                                                                 | 1<br>strongly<br>disagree | 2 | 3 | 4 | 5 | 6 | 7<br>Strongly<br>agree |
|-----------------------------------------------------------------|---------------------------|---|---|---|---|---|------------------------|
| Overall, I am satisfied with how easy it is to use this system. |                           |   |   |   |   |   |                        |
| It is simple to use this system.                                |                           |   |   |   |   |   |                        |
| I can effectively complete my work using this system.           |                           |   |   |   |   |   |                        |

|                            |                                                                                                                        |  |  |  |  |  |  |
|----------------------------|------------------------------------------------------------------------------------------------------------------------|--|--|--|--|--|--|
| 1<br>2<br>3<br>4<br>5<br>6 | I am able to complete my work quickly using this system.                                                               |  |  |  |  |  |  |
| 7<br>8<br>9                | I am able to efficiently complete my work using this system.                                                           |  |  |  |  |  |  |
| 10<br>11                   | I feel comfortable using this system.                                                                                  |  |  |  |  |  |  |
| 12<br>13                   | It was easy to learn to use this system.                                                                               |  |  |  |  |  |  |
| 14<br>15<br>16             | I believe I became productive quickly using this system.                                                               |  |  |  |  |  |  |
| 17<br>18<br>19             | The system gives error messages that clearly tell me how to fix problems.                                              |  |  |  |  |  |  |
| 20<br>21<br>22<br>23       | Whenever I make a mistake using the system, I recover easily and quickly.                                              |  |  |  |  |  |  |
| 24<br>25<br>26<br>27<br>28 | The information (such as on-line help, on-screen messages and other documentation) provided with this system is clear. |  |  |  |  |  |  |
| 29<br>30                   | It is easy to find the information I need.                                                                             |  |  |  |  |  |  |
| 31<br>32<br>33             | The information provided with the system is easy to understand.                                                        |  |  |  |  |  |  |
| 34<br>35<br>36             | The information is effective in helping me complete my work.                                                           |  |  |  |  |  |  |
| 37<br>38<br>39             | The organization of information on the system screens is clear.                                                        |  |  |  |  |  |  |
| 40<br>41                   | The interface of this system is pleasant.                                                                              |  |  |  |  |  |  |
| 42<br>43                   | I like using the interface of this system.                                                                             |  |  |  |  |  |  |
| 44<br>45<br>46<br>47       | This system has all the functions and capabilities I expect it to have.                                                |  |  |  |  |  |  |

### Intervention specific questionnaire

This questionnaire aims to evaluate your experiences and opinions on the processes of the Mobilise-D technical validation study. In particular, we are looking to focus on the components of the study which will also take place within the clinical validation trial. Therefore, when asking about certain aspects of the trial, we may be specific in relation to which device or measurement tool we want

feedback on. Please read each question carefully to ensure that your answers relate to the specific component under investigation.

The purpose of this questionnaire is to determine your opinions on i) the training you received, ii) the supporting materials that were provided to you, iii) the feasibility of conducting participant recruitment. Please answer each question honestly. All responses will be de-identified and treated anonymously.

*Training*

When considering training, we want you to consider the training that you received to carry out the following:

- Recruit participants
- Complete the human factors assessment
- Use the McRoberts device
- Use the ERT platform
- Use the EScience platform

Many of these training components would have been delivered separately. We want you to consider your experience on these training sessions overall, and then answer questions for each specific component independently. There is space to write comments at the end of this section if you wish to add more information or clarify any aspect further.

| Overall training                                                                                                 | Strongly disagree | Disagree | Neutral | Agree | Strongly agree | Not applicable |
|------------------------------------------------------------------------------------------------------------------|-------------------|----------|---------|-------|----------------|----------------|
|                                                                                                                  | 1                 | 2        | 3       | 4     | 5              |                |
| The Mobilise-D training programme was enjoyable                                                                  |                   |          |         |       |                |                |
| The Mobilise-D training programme was useful                                                                     |                   |          |         |       |                |                |
| The Mobilise-D training programme successfully prepared me to collect data within the technical validation trial |                   |          |         |       |                |                |

The Mobilise-D training programme successfully prepared me to recruit participants within the technical validation trial

| <b>Overall training content</b> | <b>Strongly disagree</b> | <b>Disagree</b> | <b>Neutral</b> | <b>Agree</b> | <b>Strongly agree</b> | <b>Not applicable</b> |
|---------------------------------|--------------------------|-----------------|----------------|--------------|-----------------------|-----------------------|
|                                 | <b>1</b>                 | <b>2</b>        | <b>3</b>       | <b>4</b>     | <b>5</b>              |                       |

The training was sufficiently interactive

The training was interesting

The training was easy to understand

The training provided a clear outline of what was expected from me

The training provided a clear rationale of recruitment processes

| <b>Recruitment training</b> | <b>Strongly disagree</b> | <b>Disagree</b> | <b>Neutral</b> | <b>Agree</b> | <b>Strongly agree</b> | <b>Not applicable</b> |
|-----------------------------|--------------------------|-----------------|----------------|--------------|-----------------------|-----------------------|
|                             | <b>1</b>                 | <b>2</b>        | <b>3</b>       | <b>4</b>     | <b>5</b>              |                       |

I felt confident in my recruitment role following training

I felt competent to complete recruitment following training

Following training, I had no questions regarding recruitment

Following training I was confident in who I should

1  
2  
3  
4  
5  
6  
7  
8  
9  
10  
11  
12  
13  
14  
15  
16  
17  
18  
19  
20  
21  
22  
23  
24  
25  
26  
27  
28  
29  
30  
31  
32  
33  
34  
35  
36  
37  
38  
39  
40  
41  
42  
43  
44  
45  
46  
47  
48  
49  
50  
51  
52  
53  
54  
55  
56  
57  
58  
59  
60

contact if I had a question  
regarding recruitment

| <b>Data collection training</b> | <b>Strongly disagree</b> | <b>Disagree</b> | <b>Neutral</b> | <b>Agree</b> | <b>Strongly agree</b> | <b>Not applicable</b> |
|---------------------------------|--------------------------|-----------------|----------------|--------------|-----------------------|-----------------------|
|                                 | <b>1</b>                 | <b>2</b>        | <b>3</b>       | <b>4</b>     | <b>5</b>              |                       |

I felt confident in my data collection role following training

I felt competent to complete data collection following training

Following training, I had no questions regarding data collection

Following training I was confident in who I should contact if I had a question regarding data collection

| <b>McRoberts training</b> | <b>Strongly disagree</b> | <b>Disagree</b> | <b>Neutral</b> | <b>Agree</b> | <b>Strongly agree</b> | <b>Not applicable</b> |
|---------------------------|--------------------------|-----------------|----------------|--------------|-----------------------|-----------------------|
|                           | <b>1</b>                 | <b>2</b>        | <b>3</b>       | <b>4</b>     | <b>5</b>              |                       |

I felt confident in using McRoberts following training

I felt competent to complete data collection with McRoberts following training

Following training, I had no questions regarding the McRoberts device

Following training I was confident in who I should contact if I had a question regarding McRoberts





*Project materials feedback*

As part of the Mobilise-D project, you received a number of materials to help support you in the recruitment and data collection processes (i.e. manuals, etc). Please provide us with your feedback on these items

| <b>Recruitment materials</b> | <b>Strongly disagree</b> | <b>Disagree</b> | <b>Neutral</b> | <b>Agree</b> | <b>Strongly agree</b> | <b>Not applicable</b> |
|------------------------------|--------------------------|-----------------|----------------|--------------|-----------------------|-----------------------|
|                              | <b>1</b>                 | <b>2</b>        | <b>3</b>       | <b>4</b>     | <b>5</b>              |                       |

The recruitment materials were easy to understand

I used the recruitment materials a lot to help me recruit participants

As recruitment progressed I used the materials less

The materials answered all my recruitment questions

The materials made the recruitment process easier

When I used the materials I felt more confident in the recruitment process

| <b>Data collection materials</b> | <b>Strongly disagree</b> | <b>Disagree</b> | <b>Neutral</b> | <b>Agree</b> | <b>Strongly agree</b> | <b>Not applicable</b> |
|----------------------------------|--------------------------|-----------------|----------------|--------------|-----------------------|-----------------------|
|                                  | <b>1</b>                 | <b>2</b>        | <b>3</b>       | <b>4</b>     | <b>5</b>              |                       |

The data collection materials were easy to understand

I used the data collection materials a lot to help me recruit participants

As data collection progressed I used the materials less

The materials answered all my data collection questions

1  
2  
3 The materials made the data  
4 collection process easier

5  
6 When I used the materials I  
7 felt more confident in the  
8 data collection process  
9  
10  
11

12  
13 Please provide us with any further feedback you have regarding the materials that you received as  
14 part of the Mobilise-D project:  
15

16  
17  
18  
19  
20  
21  
22  
23  
24  
25  
26  
27  
28

29  
30 *Feasibility of the trial procedures*

31  
32  
33 **Recruitment**

34 How many participants did your site recruit?

35 How many participants was your site due to recruit?

36 What barriers to participant recruitment did you encounter?

37 What helped you to recruit people?

38 What additional materials do you believe would help support recruitment in the future?

39 What additional support do you believe would help support recruitment in the future?

40  
41  
42  
43  
44  
45  
46 **Data collection**

47 How many participants failed to complete full data collection procedures?

48 Why?

49 What additional materials do you believe would help support data collection in the future?

50 What additional support do you believe would help support data collection in the future?

51 Do you have any other thoughts regarding the recruitment and data collection procedures of the  
52 Mobilise-D technical validation trial?  
53  
54  
55  
56  
57  
58  
59  
60

## Researcher feedback

### Interview guide

Start with a general question about how they found the experience of data collection within the Mobilise-D validation study

#### The Dynaport device

- Tell me about how you found using the Dynaport sensor during the trial?
- What were your first impressions of the device?
- Can you tell me what you liked about the device? Disliked?
- Can you tell me about any difficulties that you had with the device or its platform during the trial?
  - Difficulties they encountered themselves
    - Set up
    - Ease of explanation for participants
  - Difficulties that were reported to them
    - Did participant get in contact during the week?
    - Did any devices come back damaged?
- How would you compare this device to other wearables that you have used before?

#### The ERT device

- Tell me about how you found using the ERT platform during the trial?
- What were your first impressions of the device?
- Did any of your opinions change as the trial progressed?
- Can you tell me what you liked about the device? Disliked?
- Can you tell me about any difficulties that you had with the device during the trial?
- How did the device make you feel?

#### The EScience platform

- Tell me about how you found using the EScience platform during the trial?

- What were your first impressions of the platform?
- Did any of your opinions change as the trial progressed?
- Can you tell me what you liked about the platform? Disliked?
- Can you tell me about any difficulties that you had with the device during the trial?

### **The training and materials used**

- Can you tell me what your opinions are of the training you received before starting data collection?

Specifically related to: Dynaport, EScience, ERT and recruitment procedures

- Duration
- Content
- Facilitators
- Materials provided
- What did you expect to get out of the training?
- What was useful about the training? Not useful?
- Describe how you found the process of data collection?
- How did this compare to what you expected following training?
- What would you change about the training if you could? And the materials provided?

### **Recruitment procedures**

Can you tell me about your experiences recruiting participants for the Mobilise-D trial  
What needs to change to make recruitment easier?

# BMJ Open

## A MULTI-CENTRIC OBSERVATIONAL STUDY PROTOCOL FOR THE TECHNICAL VALIDATION OF REAL-WORLD MONITORING OF GAIT

|                               |                                                                                                                                                                                                                                                                                                                                                                                                                                                                                                                                                                                                                                                                                                                                                                                                                                                                                                                                                                                                                                                                                                                                                                                                                                                                                                                                                                                                                                                                                                                                                                                                                                                                                                                                                                                                                                                                                                                                                                                                                                                                                                                                                                                                                                                                                                                                                                |
|-------------------------------|----------------------------------------------------------------------------------------------------------------------------------------------------------------------------------------------------------------------------------------------------------------------------------------------------------------------------------------------------------------------------------------------------------------------------------------------------------------------------------------------------------------------------------------------------------------------------------------------------------------------------------------------------------------------------------------------------------------------------------------------------------------------------------------------------------------------------------------------------------------------------------------------------------------------------------------------------------------------------------------------------------------------------------------------------------------------------------------------------------------------------------------------------------------------------------------------------------------------------------------------------------------------------------------------------------------------------------------------------------------------------------------------------------------------------------------------------------------------------------------------------------------------------------------------------------------------------------------------------------------------------------------------------------------------------------------------------------------------------------------------------------------------------------------------------------------------------------------------------------------------------------------------------------------------------------------------------------------------------------------------------------------------------------------------------------------------------------------------------------------------------------------------------------------------------------------------------------------------------------------------------------------------------------------------------------------------------------------------------------------|
| Journal:                      | <i>BMJ Open</i>                                                                                                                                                                                                                                                                                                                                                                                                                                                                                                                                                                                                                                                                                                                                                                                                                                                                                                                                                                                                                                                                                                                                                                                                                                                                                                                                                                                                                                                                                                                                                                                                                                                                                                                                                                                                                                                                                                                                                                                                                                                                                                                                                                                                                                                                                                                                                |
| Manuscript ID                 | bmjopen-2021-050785.R2                                                                                                                                                                                                                                                                                                                                                                                                                                                                                                                                                                                                                                                                                                                                                                                                                                                                                                                                                                                                                                                                                                                                                                                                                                                                                                                                                                                                                                                                                                                                                                                                                                                                                                                                                                                                                                                                                                                                                                                                                                                                                                                                                                                                                                                                                                                                         |
| Article Type:                 | Protocol                                                                                                                                                                                                                                                                                                                                                                                                                                                                                                                                                                                                                                                                                                                                                                                                                                                                                                                                                                                                                                                                                                                                                                                                                                                                                                                                                                                                                                                                                                                                                                                                                                                                                                                                                                                                                                                                                                                                                                                                                                                                                                                                                                                                                                                                                                                                                       |
| Date Submitted by the Author: | 20-Oct-2021                                                                                                                                                                                                                                                                                                                                                                                                                                                                                                                                                                                                                                                                                                                                                                                                                                                                                                                                                                                                                                                                                                                                                                                                                                                                                                                                                                                                                                                                                                                                                                                                                                                                                                                                                                                                                                                                                                                                                                                                                                                                                                                                                                                                                                                                                                                                                    |
| Complete List of Authors:     | <p>Mazzà, Claudia; The University of Sheffield, INSIGNEO Institute for in silico Medicine; The University of Sheffield, Department of Mechanical Engineering</p> <p>Alcock, Lisa; University of Newcastle upon Tyne, Translational and Clinical Research Institute, Faculty of Medical Sciences</p> <p>Aminian, Kamiar; Ecole Polytechnique Federale de Lausanne, Laboratory of Movement Analysis and Measurement</p> <p>Becker, Clemens; Robert Bosch Gesellschaft für Medizinische Forschung</p> <p>Bertuletti, Stefano; University of Sassari, Department of Biomedical Sciences</p> <p>Bonci, Tecla; The University of Sheffield, INSIGNEO Institute for in silico Medicine; The University of Sheffield, Department of Mechanical Engineering</p> <p>Brown, Philip; Newcastle Upon Tyne Hospitals NHS Foundation Trust</p> <p>Brozgol, Marina; Tel Aviv Sourasky Medical Center, Center for the Study of Movement, Cognition and Mobility, Neurological Institute</p> <p>Buckley, Ellen; The University of Sheffield, INSIGNEO Institute for in silico Medicine; The University of Sheffield, Department of Mechanical Engineering</p> <p>Carsin, Anne-Elie; Instituto de Salud Global Barcelona</p> <p>Caruso, Marco; Politecnico di Torino Dipartimento di Elettronica e Telecomunicazioni; Politecnico di Torino, PolitoBIOMed Lab – Biomedical Engineering Lab</p> <p>Caulfield, Brian; University College Dublin, Insight Centre for Data Analytics, O'Brien Science Centre; University College Dublin, UCD School of Public Health, Physiotherapy and Sports Science</p> <p>Cereatti, Andrea; Politecnico di Torino Dipartimento di Elettronica e Telecomunicazioni</p> <p>Chiari, Lorenzo; University of Bologna, Department of Electrical, Electronic and Information Engineering «Guglielmo Marconi»; University of Bologna, Health Sciences and Technologies—Interdepartmental Center for Industrial Research (CIRI-SDV)</p> <p>Chynkiamis, Nikolaos; Northumbria University Newcastle, Department of Sport, Exercise and Rehabilitation</p> <p>Ciravegna, Fabio; The University of Sheffield, Department of Computer Science; The University of Sheffield, INSIGNEO Institute for in silico Medicine</p> <p>Del Din, Silvia; University of Newcastle upon Tyne, Translational and Clinical Research Institute, Faculty of Medical Sciences</p> |

|    |                                                                              |
|----|------------------------------------------------------------------------------|
| 1  |                                                                              |
| 2  |                                                                              |
| 3  |                                                                              |
| 4  | Eskofier, Björn; Friedrich-Alexander-Universität Erlangen-Nürnberg,          |
| 5  | Machine Learning and Data Analytics Lab, Department of Artificial            |
| 6  | Intelligence in Biomedical Engineering                                       |
| 7  | Evers, Jordi; McRoberts BV                                                   |
| 8  | Garcia Aymerich, Judith; Instituto de Salud Global Barcelona                 |
| 9  | Gazit, Eran; Tel Aviv Sourasky Medical Center, Center for the Study of       |
| 10 | Movement, Cognition and Mobility, Neurological Institute                     |
| 11 | Hansen, Clint; University Medical Center Schleswig-Holstein Campus           |
| 12 | Kiel, Department of Neurology                                                |
| 13 | Hausdorff, Jeffrey; Tel Aviv Sourasky Medical Center, Center for the         |
| 14 | Study of Movement, Cognition and Mobility, Neurological Institute; Tel       |
| 15 | Aviv University, Department of Physical Therapy, Sackler Faculty of          |
| 16 | Medicine & Sagol School of Neuroscience                                      |
| 17 | Helbostad, Jorunn; Norwegian University of Science and Technology,           |
| 18 | Department of Neuromedicine and Movement Science                             |
| 19 | Hidden, Hugo; University of Newcastle upon Tyne, School of Computing         |
| 20 | Hume, Emily; Northumbria University Newcastle, Department of Sport,          |
| 21 | Exercise and Rehabilitation                                                  |
| 22 | Paraschiv-Ionescu, Anisoara; Ecole Polytechnique Federale de Lausanne,       |
| 23 | Laboratory of Movement Analysis and Measurement                              |
| 24 | Ireson, Neil; The University of Sheffield, Department of Computer            |
| 25 | Science; The University of Sheffield, INSIGNEO Institute for in silico       |
| 26 | Medicine                                                                     |
| 27 | Keogh, Alison; University College Dublin, Insight Centre for Data            |
| 28 | Analytics, O'Brien Science Centre; University College Dublin, UCD School     |
| 29 | of Public Health, Physiotherapy and Sports Science                           |
| 30 | Kirk, Cameron; University of Newcastle upon Tyne, Translational and          |
| 31 | Clinical Research Institute, Faculty of Medical Sciences                     |
| 32 | Kluge, Felix; Friedrich-Alexander-Universität Erlangen-Nürnberg,             |
| 33 | Machine Learning and Data Analytics Lab, Department of Artificial            |
| 34 | Intelligence in Biomedical Engineering                                       |
| 35 | Koch, Sarah; Instituto de Salud Global Barcelona                             |
| 36 | Küderle, Arne; Friedrich-Alexander-Universität Erlangen-Nürnberg,            |
| 37 | Machine Learning and Data Analytics Lab, Department of Artificial            |
| 38 | Intelligence in Biomedical Engineering                                       |
| 39 | Lanfranchi, Vitaveska; The University of Sheffield, Department of            |
| 40 | Computer Science; The University of Sheffield, INSIGNEO Institute for in     |
| 41 | silico Medicine                                                              |
| 42 | Maetzler, Walter; University Medical Center Schleswig-Holstein Campus        |
| 43 | Kiel, Department of Neurology                                                |
| 44 | Micó-Amigo, M. Encarna; University of Newcastle upon Tyne,                   |
| 45 | Translational and Clinical Research Institute, Faculty of Medical Sciences   |
| 46 | Mueller, Arne; Novartis Pharma AG, Novartis Institutes of Biomedical         |
| 47 | Research                                                                     |
| 48 | Neatrou, Isabel; University of Newcastle upon Tyne, Translational and        |
| 49 | Clinical Research Institute, Faculty of Medical Sciences                     |
| 50 | Niessen, Martjin; McRoberts BV                                               |
| 51 | Palmerini, Luca; University of Bologna, Department of Electrical,            |
| 52 | Electronic and Information Engineering «Guglielmo Marconi»; University       |
| 53 | of Bologna, Health Sciences and Technologies—Interdepartmental Center        |
| 54 | for Industrial Research (CIRI-SDV)                                           |
| 55 | Pluimgraaff, Lucas; McRoberts BV                                             |
| 56 | Reggi, Luca; University of Bologna, Health Sciences and Technologies—        |
| 57 | Interdepartmental Center for Industrial Research (CIRI-SDV)                  |
| 58 | Salis, Francesca; University of Sassari, Department of Biomedical            |
| 59 | Sciences                                                                     |
| 60 | Schwickert, Lars; Robert Bosch Gesellschaft für Medizinische Forschung       |
|    | Scott, Kirsty; The University of Sheffield, INSIGNEO Institute for in silico |
|    | Medicine; The University of Sheffield, Department of Mechanical              |
|    | Engineering                                                                  |
|    | Sharrack, Basil; Sheffield Teaching Hospitals NHS Foundation Trust,          |

|                                 |                                                                                                                                                                                                                                                                                                                                                                                                                                                                                                                                                                                                                                                                                                                                                                                                                                                                                                                                                                                                                                                                                                                                                                                                                                                                                                                                                                                                                                                                                                                                                                                                                                           |
|---------------------------------|-------------------------------------------------------------------------------------------------------------------------------------------------------------------------------------------------------------------------------------------------------------------------------------------------------------------------------------------------------------------------------------------------------------------------------------------------------------------------------------------------------------------------------------------------------------------------------------------------------------------------------------------------------------------------------------------------------------------------------------------------------------------------------------------------------------------------------------------------------------------------------------------------------------------------------------------------------------------------------------------------------------------------------------------------------------------------------------------------------------------------------------------------------------------------------------------------------------------------------------------------------------------------------------------------------------------------------------------------------------------------------------------------------------------------------------------------------------------------------------------------------------------------------------------------------------------------------------------------------------------------------------------|
|                                 | <p>Department of Neuroscience and Sheffield NIHR Translational Neuroscience BRC<br/> Sillen, Henrik; AstraZeneca Sweden, Digital Health R&amp;D<br/> Singleton, David; University College Dublin, Insight Centre for Data Analytics, O'Brien Science Centre; University College Dublin, UCD School of Public Health, Physiotherapy and Sports Science<br/> Soltani, Abolfazi; Ecole Polytechnique Federale de Lausanne, Laboratory of Movement Analysis and Measurement<br/> Taraldsen, Kristin; Norwegian University of Science and Technology, Department of Neuromedicine and Movement Science<br/> Ullrich, Martin; Friedrich-Alexander-Universität Erlangen-Nürnberg, Machine Learning and Data Analytics Lab, Department of Computer Science<br/> Van Gelder, Linda; The University of Sheffield, INSIGNEO Institute for in silico Medicine; The University of Sheffield, Department of Mechanical Engineering<br/> Vereijken, Beatrix; Norwegian University of Science and Technology, Department of Neuromedicine and Movement Science<br/> Vogiatzis, Ioannis ; Northumbria University Newcastle, Department of Sport, Exercise and Rehabilitation<br/> Warmerdam, Elke; University Medical Center Schleswig-Holstein Campus Kiel, Department of Neurology<br/> Yarnall, Alison; Newcastle University Faculty of Medical Sciences, Translational and Clinical Research Institute; Newcastle Upon Tyne Hospitals NHS Foundation Trust<br/> Rochester, Lynn; University of Newcastle upon Tyne, Translational and Clinical Research Institute, Faculty of Medical Sciences; Newcastle Upon Tyne Hospitals NHS Foundation Trust</p> |
| <b>Primary Subject Heading</b>: | Diagnostics                                                                                                                                                                                                                                                                                                                                                                                                                                                                                                                                                                                                                                                                                                                                                                                                                                                                                                                                                                                                                                                                                                                                                                                                                                                                                                                                                                                                                                                                                                                                                                                                                               |
| Secondary Subject Heading:      | Research methods, Neurology, Respiratory medicine                                                                                                                                                                                                                                                                                                                                                                                                                                                                                                                                                                                                                                                                                                                                                                                                                                                                                                                                                                                                                                                                                                                                                                                                                                                                                                                                                                                                                                                                                                                                                                                         |
| Keywords:                       | Multiple sclerosis < NEUROLOGY, Parkinson-s disease < NEUROLOGY, Hip < ORTHOPAEDIC & TRAUMA SURGERY, Chronic airways disease < THORACIC MEDICINE, Heart failure < CARDIOLOGY                                                                                                                                                                                                                                                                                                                                                                                                                                                                                                                                                                                                                                                                                                                                                                                                                                                                                                                                                                                                                                                                                                                                                                                                                                                                                                                                                                                                                                                              |
|                                 |                                                                                                                                                                                                                                                                                                                                                                                                                                                                                                                                                                                                                                                                                                                                                                                                                                                                                                                                                                                                                                                                                                                                                                                                                                                                                                                                                                                                                                                                                                                                                                                                                                           |

SCHOLARONE™  
Manuscripts





I, the Submitting Author has the right to grant and does grant on behalf of all authors of the Work (as defined in the below author licence), an exclusive licence and/or a non-exclusive licence for contributions from authors who are: i) UK Crown employees; ii) where BMJ has agreed a CC-BY licence shall apply, and/or iii) in accordance with the terms applicable for US Federal Government officers or employees acting as part of their official duties; on a worldwide, perpetual, irrevocable, royalty-free basis to BMJ Publishing Group Ltd ("BMJ") its licensees and where the relevant Journal is co-owned by BMJ to the co-owners of the Journal, to publish the Work in this journal and any other BMJ products and to exploit all rights, as set out in our [licence](#).

The Submitting Author accepts and understands that any supply made under these terms is made by BMJ to the Submitting Author unless you are acting as an employee on behalf of your employer or a postgraduate student of an affiliated institution which is paying any applicable article publishing charge ("APC") for Open Access articles. Where the Submitting Author wishes to make the Work available on an Open Access basis (and intends to pay the relevant APC), the terms of reuse of such Open Access shall be governed by a Creative Commons licence – details of these licences and which [Creative Commons](#) licence will apply to this Work are set out in our licence referred to above.

Other than as permitted in any relevant BMJ Author's Self Archiving Policies, I confirm this Work has not been accepted for publication elsewhere, is not being considered for publication elsewhere and does not duplicate material already published. I confirm all authors consent to publication of this Work and authorise the granting of this licence.

## A MULTI-CENTRIC OBSERVATIONAL STUDY FOR THE TECHNICAL VALIDATION OF REAL-WORLD MONITORING OF GAIT

Mazzà Claudia<sup>1,2</sup>, Alcock Lisa<sup>3</sup>, Aminian Kamiar<sup>4</sup>, Becker Clemens<sup>5</sup>, Bertuletti Stefano<sup>6</sup>, Bonci Tecla<sup>1,2</sup>, Brown Philip<sup>7</sup>, Brozgol Marina<sup>8</sup>, Buckley Ellen<sup>1,2</sup>, Carsin Anne-Elie<sup>9</sup>, Caruso Marco<sup>10,11</sup>, Caulfield Brian<sup>12,13</sup>, Cereatti Andrea<sup>10</sup>, Chiari Lorenzo<sup>14,15</sup>, Chynkiamis Nikolaos<sup>16</sup>, Ciravegna Fabio<sup>1,17</sup>, Del Din Silvia<sup>3</sup>, Eskofier Björn<sup>18</sup>, Evers Jordi<sup>19</sup>, Garcia-Aymerich, Judith<sup>9</sup>, Gazit Eran<sup>8</sup>, Hansen Clint<sup>20</sup>, Hausdorff Jeffrey<sup>8,21</sup>, Helbostad Jorunn<sup>22</sup>, Hiden Hugo<sup>23</sup>, Hume Emily<sup>16</sup>, Paraschiv-Ionescu Anisoara<sup>4</sup>, Ireson Neil<sup>1,17</sup>, Keogh Alison<sup>12,13</sup>, Kirk Cameron<sup>3</sup>, Kluge Felix<sup>18</sup>, Koch Sarah<sup>9</sup>, Küderle Arne<sup>18</sup>, Lanfranchi Vitaveska<sup>1,17</sup>, Maetzler Walter<sup>20</sup>, Micó-Amigo M. Encarna<sup>3</sup>, Mueller Arne<sup>24</sup>, Neatrour Isabel<sup>3</sup>, Niessen Martjin<sup>19</sup>, Palmerini Luca<sup>14,15</sup>, Pluimgraaff Lucas<sup>19</sup>, Reggi Luca<sup>15</sup>, Salis Francesca<sup>6</sup>, Schwickert Lars<sup>5</sup>, Scott Kirsty<sup>1,2</sup>, Sharrack Basil<sup>25</sup>, Sillen Henrik<sup>26</sup>, Singleton David<sup>12,13</sup>, Soltani Abolfazi<sup>4</sup>, Taraldsen Kristin<sup>22</sup>, Ullrich Martin<sup>18</sup>, Van Gelder Linda<sup>1,2</sup>, Vereijken Beatrix<sup>22</sup>, Vogiatzis, Ioannis<sup>16</sup>, Warmerdam Elke<sup>20</sup>, Yarnall Alison<sup>3,7</sup>, Rochester Lynn<sup>3,7</sup>

### Corresponding author:

Prof. Claudia Mazzà

[c.mazza@sheffield.ac.uk](mailto:c.mazza@sheffield.ac.uk)

Pam Liversidge Building - Room F14

Mappin Street, Sheffield, S1 3JD, UK

Phone: +44 (0)114 2226073

1. INSIGNEO Institute for in silico Medicine, The University of Sheffield, Sheffield, UK
2. Department of Mechanical Engineering, The University of Sheffield, Sheffield, UK
3. Translational and Clinical Research Institute, Faculty of Medical Sciences, University of Newcastle upon Tyne, Newcastle upon Tyne, UK
4. Laboratory of Movement Analysis and Measurement, Ecole Polytechnique Federale de Lausanne, Lausanne, Switzerland
5. Robert Bosch Gesellschaft für Medizinische Forschung, Stuttgart, Germany
6. Department of Biomedical Sciences, University of Sassari, Sassari, Italy
7. Newcastle Upon Tyne Hospitals NHS Foundation Trust, Newcastle upon Tyne, UK
8. Center for the Study of Movement, Cognition and Mobility, Neurological Institute, Tel Aviv Sourasky Medical Center, Tel Aviv, Israel
9. Instituto de Salud Global Barcelona, Barcelona, Spain
10. Dipartimento di Elettronica e Telecomunicazioni, Politecnico di Torino, Turin, Italy
11. PolitoBIOMed Lab – Biomedical Engineering Lab, Politecnico di Torino, Turin, Italy
12. Insight Centre for Data Analytics, O'Brien Science Centre, University College Dublin, Dublin, Ireland
13. UCD School of Public Health, Physiotherapy and Sports Science, University College Dublin, Dublin, Ireland
14. Department of Electrical, Electronic and Information Engineering «Guglielmo Marconi», University of Bologna, Bologna, Italy
15. Health Sciences and Technologies—Interdepartmental Center for Industrial Research (CIRI-SDV), University of Bologna, Bologna, Italy
16. Department of Sport, Exercise and Rehabilitation, Northumbria University Newcastle, Newcastle upon Tyne, UK
17. Department of Computer Science, The University of Sheffield, Sheffield, UK

18. Machine Learning and Data Analytics Lab, Department of Artificial Intelligence in Biomedical Engineering, Friedrich-Alexander-Universität Erlangen-Nürnberg, Erlangen, Germany
19. McRoberts BV, The Hague, Netherlands
20. Department of Neurology, University Medical Center Schleswig-Holstein Campus Kiel, Kiel, Germany
21. Department of Physical Therapy, Sackler Faculty of Medicine & Sagol School of Neuroscience, Tel Aviv University, Tel Aviv, Israel
22. Department of Neuromedicine and Movement Science, Norwegian University of Science and Technology, Trondheim, Norway
23. School of Computing, University of Newcastle upon Tyne, Newcastle upon Tyne, UK
24. Novartis Institutes of Biomedical Research, Novartis Pharma AG, Basel, Switzerland
25. Department of Neuroscience and Sheffield NIHR Translational Neuroscience BRC, Sheffield Teaching Hospitals NHS Foundation Trust, Sheffield, UK
26. Digital Health R&D, AstraZeneca, Sweden

### Keywords

Gait analysis; wearable sensors; activity monitoring; users evaluation; mobility outcomes

**Wordcount:** 5491

# 1 ABSTRACT

## Introduction

Existing mobility endpoints based on functional performance, physical assessments and patient self-reporting are often affected by lack of sensitivity, limiting their utility in clinical practice. Wearable devices including inertial measurement units (IMUs) can overcome these limitations by quantifying digital mobility outcomes (DMOs) both during supervised structured assessments and in real-world conditions. The validity of IMU-based methods in the real-world, however, is still limited in patient populations. Rigorous validation procedures should cover the device metrological verification, the validation of the algorithms for the DMOs computation specifically for the population of interest and in daily life situations, and the users' perspective on the device.

## Methods and analysis

This protocol was designed to establish the technical validity and patient acceptability of the approach used to quantify digital mobility in the real-world by Mobilise-D, an EU-funded consortium part of the Innovative Medicine Initiative, aiming at fostering regulatory approval and clinical adoption of DMOs. After defining the procedures for the metrological verification of an IMU based device, the experimental procedures for the validation of algorithms used to calculate the DMOs are presented. These include laboratory and real-world assessment in 120 participants from five groups: healthy older adults; chronic obstructive pulmonary disease, Parkinson's disease, multiple sclerosis, proximal femoral fracture, and congestive heart failure. DMOs extracted from the monitoring device will be compared to those from different reference systems, chosen according to the contexts of observation. Questionnaires and interviews will evaluate the users' perspective on the deployed technology and relevance of the mobility assessment.

## Ethics and Dissemination

The study, registered at ISRCTN (12246987), has been granted ethics approval by the centre's committees (London – Bloomsbury Research Ethics committee; Helsinki Committee, Tel Aviv Sourasky Medical Centre; Medical Faculties of The University of Tübingen and of the University of Kiel). Data and algorithms will be made publicly available.

## Strengths and limitations of this study

- A multi-disciplinary approach was implemented to define a protocol for the validation of tools for mobility monitoring, covering aspects related to devices, algorithms and users.
- A set of rigorous quality assurance procedures have been established to allow for the creation of a high-quality annotated dataset to foster development in the field of digital mobility monitoring.

- Mobility data will be collected in the laboratory and in the real-world for five different cohorts of slow-walkers. and subsequently will be made publicly available at the end of the study.
- The multi-stage and multi-device experimental procedures required by this validation study can be extremely challenging for both the participants and the assessors.
- For the laboratory acquisitions, the level of agreement between the gold standard and the inertial sensor devices might be affected by the limitations associated with a restricted capture volume.

## 2 INTRODUCTION

The ability to move is a key contributor to physical, mental and social well-being, which is in line with the World Health Organisation's (WHO's) definition of health [1]. However, the study of mobility has received relatively little attention, except for diseases characterised by specific mobility dysfunction. The increasing longevity of the world's population together with prolonged survival of many patients with long term conditions means that more people are suffering from loss of mobility, which in turn is a major contributing factor to a loss of independence [2,3]. This has a considerable and growing personal, societal and economic impact. Efforts to mitigate this loss of mobility are an increasing priority and promising interventions are now under investigation.

Existing mobility endpoints based on performance, patient self-reporting and one-off assessment are resource-intensive and lack sensitivity [4], which limits therapeutic development and clinical management. A novel approach is needed that is low cost, simple, accurate and that can be used in the real world, including the home and the community.

Poor gait, especially slow walking, is a key determinant of mobility loss. It is associated with greater mortality, morbidity, cognitive decline, dementia and fall risk [2,3]. Quantifying gait related mobility outcomes, including features such as step/stride duration and their variability, walking speed and asymmetry features is well established in supervised instrumented assessments.

Wearable devices including inertial measurement units (IMUs) that allow digital mobility outcomes (DMOs) to be described, are leading the transition from laboratory-based assessment of mobility (mobility capacity), to continuous, unsupervised monitoring of mobility in daily life conditions (mobility performance). Nonetheless, the validity of IMU-based methods to characterise real-world mobility, and gait in particular, is still limited, especially in populations suffering from pathological conditions. This is because measuring real-world gait is far from simple or straightforward. In addition, complex factors arise from multiple sources that influence outcome measures, including disease characteristics, patient specific habits, environment/context and the purpose of walking. All these factors limit the validity of existing algorithms developed to quantify targeted DMOs [5]. Additionally, validation should include simultaneous evaluation [6] of the participants perception and acceptability of the device [7] as well as aspects related to wearability and usability [8,9]. Finally, a separate assessment of the metrological performance of the sensors contained in the adopted device is required.

1  
2  
3 All these validation steps need to be taken before the DMOs and the associated technologies can be  
4 effectively used for clinical [4] and regulatory [10] purposes (see Figure 1 for summary).  
5  
6  
7

8 [Figure 1 around here]  
9

10  
11 In this paper, we present the comprehensive, multi-stage protocol deployed in the technical validation  
12 study (TVS) that we have developed as part of the IMI2-JU-funded Mobilise-D project (Number  
13 820820 [11]), that aims to validate a new digital method for remote monitoring of mobility. In  
14 particular, this multi-stage protocol aims to: a) verify the metrological performance of the sensors  
15 included in a IMU based monitoring device, using a procedure that could be replicated on any device;  
16 b) establish the validity and reliability [12] of the DMOs estimated by the algorithms using data from  
17 an IMU based device, taking into accounts the effects of populations (e.g., healthy adults, patients with  
18 various conditions), locomotor activities (simple straight walking versus complex walking tasks),  
19 contexts (lab based versus real-world), durations (device wearing time, DMOs hourly and daily  
20 fluctuations, etc.), and contextual confounding factors (such as location of walks, weather, use of  
21 walking aids, etc.); and, c) establish participants' and assessors' opinions on the usability and  
22 acceptability of the monitoring devices that will be deployed.  
23  
24  
25  
26  
27  
28  
29

30 This protocol will provide the stakeholders, the first comprehensive, multi-modal solution to validate  
31 real-world mobility. Notably, the protocol described here has been accepted by the European Medical  
32 Agency [13] as part of the Mobilise-D process for the regulatory qualification of real-world mobility  
33 performance biomarkers in Parkinson's disease. [10]  
34  
35  
36  
37  
38

### 39 **3 METHODS**

40 The monitoring device that will be used in this study to collect mobility data is the DynaPort MM+  
41 IMU (McRoberts, Table 1). In a trade-off between usability, accuracy and ability to provide DMOs for  
42 both at step and stride level, this is attached to the lower back via an elastic waistband and Velcro strap.  
43 The validity of algorithms to accurately estimate DMOs in the real-world will be investigated in 120  
44 participants including: healthy older adults (HA) and in five clinical cohorts (chronic obstructive  
45 pulmonary disease, COPD; Parkinson's disease, PD; multiple sclerosis, MS; proximal femoral fracture,  
46 PFF; and congestive heart failure, CHF), chosen as presenting a variety of gait and mobility features  
47 [4]. The usability and acceptability of the device from the perspective of the participants and the  
48 assessors involved in the study will be established via interviews and questionnaires.  
49  
50  
51  
52  
53  
54  
55

#### 56 **3.1 Verification of the metrological performances of the device**

57 Verifying the performance of a device needs a robust and comprehensive metrological characterisation  
58 of all the sensors that it embeds. This requires a series of standardised procedures (spot-checks) to be  
59  
60

implemented to ensure accuracy of raw data that will be used as input to the algorithms. Table 1 shows the sensing characteristics of the device used in this study, the DynaPort MM+ (dimensions: 106.6 x 58 x 11.5mm, size: 55 grams).

**Table 1** Characteristics of the sensors included in the DynaPort MM+ device

| Sensor                  | Sampling Frequency | Sensor Range | Sensor resolution       |
|-------------------------|--------------------|--------------|-------------------------|
| Tri-axial accelerometer | 100 Hz             | ± 8g         | 1 mg (at ± 8g)          |
| Tri-axial gyroscope     | 100 Hz             | ± 2000 dps   | 70 mdps (at ± 2000 dps) |

According to Institute of Electrical and Electronics Engineers *Standard for Sensor Performance Parameter Definitions* ((IEEE 2700-2017 [14]) a number of parameters are needed to characterise the metrological performance of the accelerometer, gyroscope, and magnetometer included in an IMU. These parameters can be computed under both static and dynamic conditions. The main noise parameters used are the first (mean value) and second (variance) order statistics, and the root Allan variance parameters of noise [15,16]. The parameters related to the first and second order statistics of noise can also be estimated by means of a short static acquisition (the minimum length of each acquisition is defined by IEEE standard for each sensor). These short static acquisitions can be performed simply using a plastic cube, where the device can be properly secured and then each of the three sensors' coordinate axes x, y and z are in turn aligned with the direction of gravity (g) as well as its opposite direction (six combinations, Figure 2). The root Allan variance parameters are instead computed over a long static acquisition [17]. Typically, the acquisitions are performed over a period of 4-8 hours [15,16]. All the static acquisitions should be carried out at a constant temperature of 25°C. In comparison to a static acquisition, characterising the dynamic metrological performance of the sensors embedded in an IMU is less straightforward, since the metrological standards provided by IEEE describe a sequence of operations requiring an expensive and complex testing instrumentation. However, various alternatives have been proposed in the literature. The accuracy of a gyroscope can be quantified during a single-axis rotation by a known angle by computing the ideal angular velocity and comparing it to the average measured angular velocity [18,19]. This procedure should be performed using a rotation plate with a rotating speed comparable to what is encountered during human gait (~200 deg/s) (Figure 2).

[Figure 2 around here]

The tests described above will be performed on thirty-five different DynaPort MM+ devices deployed in the study. This will allow conformity with manufacturer indications to be verified, highlight the need for sensor recalibrations and provide benchmark standards for any device with equivalent sensing capacity. In turn, this will allow any device with an equivalent or superior solution to be used, in order

1  
2  
3 to facilitate broader adoption of validated algorithms and cope with a continuously changing hardware  
4 landscape.  
5  
6  
7  
8

## 9 **3.2 Protocol for Validation of the algorithms**

10 Several algorithms to detect the DMOs from a single device have been implemented according to agreed  
11 definitions [20] and based on existing literature. At this time, these algorithms are being concurrently  
12 validated using the approach described by Bonci et al. [6] using pre-existing datasets, which mostly  
13 include lab-based observations only. Following this selection process, the best performing algorithms  
14 will be assessed using the data captured with the protocol here described.  
15  
16  
17  
18

### 19 **3.2.1 Ethics and Dissemination**

20 This multi-centre study is sponsored and coordinated by The Newcastle upon Tyne Hospitals NHS  
21 Foundation Trust, UK. Participants will be recruited in five sites across Europe: Tel Aviv Sourasky  
22 Medical Center, Israel (ethics approval granted by the Helsinki Committee, Tel Aviv Sourasky Medical  
23 Center, Tel Aviv, Israel, 0551-19TLV), Robert Bosch Foundation for Medical Research, Germany  
24 (ethics approval granted by the ethical committee of the medical faculty of The University of Tübingen,  
25 647/2019BO2), University of Kiel, Germany (ethics approval granted by the ethical committee of the  
26 medical faculty of Kiel University, D438/18), The Newcastle upon Tyne Hospitals NHS Foundation  
27 Trust, UK and Sheffield Teaching Hospitals NHS Foundation Trust, UK (ethics approval granted by  
28 London – Bloomsbury Research Ethics committee, 19/LO/1507).  
29  
30  
31  
32  
33  
34  
35

36 As per the study register (ISRCTN, 12246987) the data collection was originally planned to start in  
37 April 2021 and last six months. The pandemic situation meant that the study started in July 2020 and is  
38 now planned to finish in September 2021. All experimental procedures are constantly monitored and  
39 revised as needed to ensure full compliance with COVID19-related health and safety measures and for  
40 safeguarding of both the study participants and the assessors. The data collected as part of this protocol  
41 will be made publicly available together with the algorithms used to process the data.  
42  
43  
44  
45

### 46 **3.2.2 Participants**

47 A convenience sample of 120 participants will be recruited via their clinical care team or research  
48 registers to represent the five disease cohorts (COPD, PD, MS, PFF, and CHF), as well as healthy older  
49 adults (HA). Twenty participants will be recruited for each cohort. Each cohort will be recruited across  
50 multiple sites to ensure generalisability (e.g. differing cultures and contexts). Inclusion and exclusion  
51 criteria, grouped by total cohort and disease cohort, are summarised in Table 2. Given the novelty of  
52 the data, rather than on a power calculation the sample size of 120 has been initially defined according  
53 to Consensus-based Standards for the selection of health Measurement Instruments guidelines for  
54 measurement properties (COSMIN [21]). This sample size, however, will be refined after 50% of the  
55  
56  
57  
58  
59  
60



data collection. Given the DMOs are measured at walking bout level and not at patient level, in this analysis we will use the effective number of walking bouts observed during the 2.5 hours to perform the power calculation. We will base this analysis on a desired ICC coefficient  $\geq 0.7$ , with Alpha=0.05 and Beta=0.9, and an aimed confidence interval of 0.1. Based on this review, more participants may be recruited.

All participants will give written informed consent prior to undergoing a clinic/laboratory-based session to record generic and disease-specific characteristics. This will include participant reported outcomes, assessments and medical notes review. The generic and cohort-specific clinical outcomes that will be collected are summarised in Table 3.

**Table 2** Inclusion and exclusion criteria adopted for the different disease cohorts

| Group      | Inclusion criteria                                                                                                                                                                                                                                                                                                                                                                                                                                                                                                                                                    | Exclusion criteria                                                                                                                                                                                                                                                                                                                                                                                         |
|------------|-----------------------------------------------------------------------------------------------------------------------------------------------------------------------------------------------------------------------------------------------------------------------------------------------------------------------------------------------------------------------------------------------------------------------------------------------------------------------------------------------------------------------------------------------------------------------|------------------------------------------------------------------------------------------------------------------------------------------------------------------------------------------------------------------------------------------------------------------------------------------------------------------------------------------------------------------------------------------------------------|
| All groups | <ul style="list-style-type: none"> <li>-able to walk 4 meters independently with or without walking aids</li> <li>-able to give informed consent</li> <li>-willingness to wear the sensor set-ups during the study</li> <li>-shoe size 36 EU (3 UK) or above</li> <li>-able to read and write in first language of the respective country</li> <li>-Montreal Cognitive Assessment (MoCA) &gt;15 [22]</li> <li>-available for home /office visit during study period</li> </ul>                                                                                        | <ul style="list-style-type: none"> <li>-occurrence of any of the following 3 months prior to inclusion: myocardial infarction, hospitalisation for unstable angina, stroke, coronary artery bypass graft, percutaneous coronary intervention, implantation of a cardiac resynchronisation therapy device</li> <li>-current medical condition that could interfere with the patient's compliance</li> </ul> |
| COPD       | <ul style="list-style-type: none"> <li>- <math>\geq 45</math> years of age</li> <li>-Diagnosis of COPD (post-bronchodilator forced expiratory volume in the first second (FEV<sub>1</sub>) to forced vital capacity (FVC) ratio &lt;0.70)</li> <li>-clinical stability, defined as at least 4 weeks without antibiotics and/or oral corticosteroids to treat either a moderate or severe exacerbation</li> <li>- current or ex-smokers with a smoking history equivalent to at least 10 pack years (1 pack year = 20 cigarettes smoked per day for 1 year)</li> </ul> | <ul style="list-style-type: none"> <li>-having undergone major lung surgery (e.g., lung volume reduction, lung transplant)</li> <li>-having a lung tumour</li> <li>-primary respiratory diseases other than COPD (e.g., asthma)</li> <li>- impaired mobility related to non-COPD causes, as judged by the investigator</li> </ul>                                                                          |
| PD         | <ul style="list-style-type: none"> <li>-aged 18+ years</li> <li>-Diagnosis of PD according to the Movement Disorders Society criteria [23]</li> </ul>                                                                                                                                                                                                                                                                                                                                                                                                                 | <ul style="list-style-type: none"> <li>-impaired mobility related to non-PD causes, as judged by the investigator</li> </ul>                                                                                                                                                                                                                                                                               |
| MS         | <ul style="list-style-type: none"> <li>-aged 18+ years</li> <li>-Diagnosis of MS based on the revised McDonald's criteria</li> </ul>                                                                                                                                                                                                                                                                                                                                                                                                                                  | <ul style="list-style-type: none"> <li>-impaired mobility related to non-MS causes, as judged by the investigator</li> </ul>                                                                                                                                                                                                                                                                               |

|                                               |                                                                                                                                                                                                                                |                                                                                                             |
|-----------------------------------------------|--------------------------------------------------------------------------------------------------------------------------------------------------------------------------------------------------------------------------------|-------------------------------------------------------------------------------------------------------------|
| PFF                                           | -65+ years of age<br>-surgical treatment (fixation or arthroplasty) for a low-energy fracture of the proximal femur (ICD*-10 diagnosis S72.0, S72.1, S72.2) as diagnosed on X-rays of the hip and pelvis within last 12 months | -impaired mobility related to non-PFF causes, as judged by the investigator                                 |
| CHF                                           | - ≥45 years of age<br>-Diagnosis of chronic heart failure with a grading of II-IV of the New York Heart Association (NYHA) Classification                                                                                      | - history of COPD ≥GOLD III<br>- impaired mobility related to non-CHF causes, as judged by the investigator |
| HA                                            | 65+ years of age                                                                                                                                                                                                               |                                                                                                             |
| *ICD, International Classification of Disease |                                                                                                                                                                                                                                |                                                                                                             |

**Table 3** Generic and cohort-specific clinical outcomes.

| Cohort | Generic Outcomes                                                                                                                                                                                                                                                                                                                                                                                                                                                                                                                                                                                                                                                                 |
|--------|----------------------------------------------------------------------------------------------------------------------------------------------------------------------------------------------------------------------------------------------------------------------------------------------------------------------------------------------------------------------------------------------------------------------------------------------------------------------------------------------------------------------------------------------------------------------------------------------------------------------------------------------------------------------------------|
| All    | <ul style="list-style-type: none"> <li>- Descriptive measures (age, sex, living arrangements, education)</li> <li>- Anthropometric measures (height, mass, shoe size, waist width)</li> <li>- Health status (comorbidities, number of falls and injuries in the 12 months prior to assessment, walking aid usage and current medication)</li> <li>- Montreal Cognitive Assessment to evaluate global cognition [22]</li> <li>- Visual Analogue Scale to measure pain during walking (0-10, from no pain to worse pain possible)</li> <li>- Function component of the Late-Life Function and Disability Instrument (LLFDI) to evaluate function and disability [24,25]</li> </ul> |
| Cohort | Cohort-specific clinical outcomes                                                                                                                                                                                                                                                                                                                                                                                                                                                                                                                                                                                                                                                |
| PD     | <ul style="list-style-type: none"> <li>- Movement Disorder Society (MDS)-sponsored revision of the Unified Parkinson's Disease (PD) Rating Scale (UPDRS), motor part [26]</li> </ul>                                                                                                                                                                                                                                                                                                                                                                                                                                                                                             |
| MS     | <ul style="list-style-type: none"> <li>- Expanded Disability Status Scale (EDSS)* [27]</li> </ul>                                                                                                                                                                                                                                                                                                                                                                                                                                                                                                                                                                                |
| COPD   | <ul style="list-style-type: none"> <li>- 6-minute walk test</li> <li>- Recent spirometry test obtained from medical notes to characterise lung function*</li> <li>- COPD Assessment Test™ (CAT) [28]</li> </ul>                                                                                                                                                                                                                                                                                                                                                                                                                                                                  |
| PFF    | <ul style="list-style-type: none"> <li>- Short Physical Performance Battery (SPPB) – quiet standing balance task, a five times chair-raise test, and a 4m walk test at preferred gait speed</li> </ul>                                                                                                                                                                                                                                                                                                                                                                                                                                                                           |
| CHF    | <ul style="list-style-type: none"> <li>- 6-minute walk test</li> <li>- Kansas City Cardiomyopathy Questionnaire (KCCQ) * [29]</li> </ul>                                                                                                                                                                                                                                                                                                                                                                                                                                                                                                                                         |

\* denotes measures obtained from medical records if completed within 6 months prior to assessment

### 3.2.3 Patient and Public Involvement

Patient and Public involvement and engagement (PPIE) has informed the design and conduct of this study. The protocol and patient facing documents were reviewed and changes implemented based upon reviewer feedback. We will work with our Patient Advisory Group (with members representing the patient cohorts involved in the study) to review study findings, data interpretation and study reporting and dissemination, including co-design and presentation of dissemination materials for patients and the public. The learnings derived from these activities will further inform the work of the wider Mobilise-D project.

### 3.2.4 Experimental protocol

Performance of algorithms to determine walking-related DMOs is mostly affected by three factors: (i) the type of motor task (e.g., slow as opposed to fast, straight as opposed to curvilinear or inclined walking, etc.), (ii) the population of interest (e.g., healthy vs pathological gait), (iii) the context of observation (e.g., home vs outdoors). To accommodate these factors, we have developed a comprehensive, multi-stage protocol that includes a variety of tests conducted both in a laboratory context and in the real world (Table 4).

**Table 4** Summary of the experimental protocol used for the validation of the algorithms in the laboratory and in the real world. INDIP= INertial module with DIstance Sensors and Pressure insoles.

| Context of assessment  | Reference Systems            | Tested device | Mobility Tasks                                                     |
|------------------------|------------------------------|---------------|--------------------------------------------------------------------|
| Laboratory             | Stereophotogrammetry         | DynaPort MM+  | Structured mobility tasks and daily living activities              |
|                        |                              | INDIP         |                                                                    |
| Real world (2.5 hours) | INDIP                        | DynaPort MM+  | Unsupervised real-world activities (including predetermined tasks) |
|                        | Mobile Phone with Aeqora App |               |                                                                    |
|                        | Beacon                       |               |                                                                    |
| Real world (7 days)    | Mobile Phone with Aeqora App | DynaPort MM+  | Unsupervised daily living                                          |
|                        | Beacon                       |               |                                                                    |

### a. Laboratory based assessment

Laboratory-based observations will be used to quantify validity and consistency within and between groups and different types of walking tasks under controlled ideal conditions. Structured and task-based mobility activities and a simulated daily activity session, mimicking habitual movements performed at home or at work will be included. The outcome of this comparison will provide the level of highest expected accuracy and minimum detectable changes for a given DMO.

#### *Measurement tools*

##### *Reference system*

A stereophotogrammetric (SP) system (100Hz) will be used as the gold standard in structured and simulated tests of daily activities to validate the DMOs calculated from the DynaPort MM+ raw data. SP systems provide a measurement of the instantaneous position of points in a 3D measurement volume, by means of a set of cameras, each of which can capture the 2D trajectories of markers that are attached to the object of interest. The trajectory reconstructions are affected by systematic and random instrumental errors, normally minimised to a few millimetres via ad hoc calibration procedures and filtering and smoothing techniques [30].

To ensure quality and consistency in the SP data collection, accommodating different SP systems across sites, a spot check designed following the methodology proposed by Di Marco et al. [31] will be used, which will establish the specific level of accuracy for each system. A graphical user interface (GUI) for automated pre-processing of the SP data will ensure consistency in associated procedures (labelling, gap filling, etc.).

A bespoke marker set will be adopted, including four markers on each foot for detecting the gait events and four markers on the lower back device to track the displacement of the DynaPort device (Figure 3).

[Figure 3 around here]

##### *Tested devices*

During this observation each participant will also be equipped with an additional multi-sensor system (INertial module with DIstance Sensors and Pressure insoles, INDIP) [32–34] and with the Dynaport MM+. The INDIP system (Figure 4) includes four inertial modules (one on the lower back, one on the non-dominant wrist and two on the feet), two distance sensors and two force-sensitive resistor pressure insoles including 16 force-resistive sensing elements (manufacturer 221e S.r.l., Italy). The INDIP has been designed to be used as a reference for real-world experiments, and in this phase of the protocol its performance will be validated against the SP system for the populations of interest. Spatio-temporal parameters will be estimated exploiting the sensors redundancy and implementing previously validated sensor fusion algorithms. Gait events will be detected using data from pressure insoles and inertial

sensors independently, and then combined to increase robustness and detection accuracy (missed and minimisation of extra events). Spatial variables will be computed from the inertial data of the feet using a Madgwick filter [35,36] combined with a zero-velocity update [37,38], subsequently velocity and displacement will be calculated using a direct and reverse approach [32,39–41]. The individual components of the INDIP system and the associated algorithms for the estimates of the DMOs have already been extensively validated in previous studies on various healthy and pathological cohorts [39,42,43]. The final assembled system in its fully synchronized configuration, developed to address the requirements of this study, is expected to perform equivalently and as such we can anticipate mean absolute percentage errors of 1% on the stride duration, between 2% and 3% in the estimate of the stride length. Preliminary results from in-lab validation showed percentage errors of about 2% for gait speed as estimated during continuous walking, including both straight and curvilinear portions [44].

[Figure 4 around here]

The lower back INDIP unit and the DynaPort MM+ will be rigidly attached to each other. The data from the SP (100Hz), INDIP (IMU and insoles, 100Hz, Distance sensor, 50Hz) and DynaPort MM+ (100Hz) systems will be synchronised using a hardware-based approach for the SP and the INDIP system, and timestamps to align recordings from the INDIP and the DynaPort MM+.

### Mobility tasks

#### *Structured Mobility Tasks*

*Straight Walking:* Straight walking is the most common test of walking. [45,46] The participant walks for a distance of 5m from a standing start and will be repeated at three different walking speeds: preferred, fast and slow (Figure 5 A).

*Timed Up and Go (TUG):* The TUG is a widely used clinical assessment of a person's mobility [47]. The participant is asked to sit in a chair, stand up, walk 3 m in a straight line, make a 180° turn, walk back to the chair, turn and sit down (Figure 5 B).

*L Test:* The participant is asked to sit in a chair, stand up, walk straight, turn 90° to the left around a cone, walk straight to the second cone, make a 180° turn to the left, walk straight before making a final 90° turn to the right and return to the chair to sit down (Figure 5 C). Besides being a clinically validated test, [48] the main purpose of including this test is the variation in curvilinear walking and the inclusion of different types of turns.

Two novel additional tests were also included to simulate confounding factors that could be encountered in the real world:

*Surface Test:* The participant walks around a defined circuit by turning around the cones (Figure 5 D). The circuit is completed twice, creating the longest walking bout out of all the tasks (approx. 20m).

*Hallway Test:* The participant walks along a 6m walkway stepping up and down a step positioned in the walkway. At the end of the walkway, the participant will complete a sharp 180° turn and walk back

1  
2  
3 along the walkway (again stepping up and down off the step) until reaching the end point of the test  
4 (Figure 5 E).  
5

6 [Figure 5 around here]  
7  
8

9  
10 *Daily living activities*

11 These lab-based tasks will be used to simulate daily activities expected in the real life, similar to  
12 previous studies [49]. The participant starts by sitting in chair one and then executes a series of daily  
13 living tasks while moving around the room (see Figure 5F and G).  
14

15 Patients will be given regular opportunities for rest periods and will be asked to communicate if they  
16 require any additional breaks or would like to stop the assessment at any point. Use of arm rests for the  
17 TUG, L-Test and SDA, as well as handrails for the hallway test are permitted when needed.  
18  
19  
20  
21

22  
23 **b. Real - world validation (2.5 hours observation)**

24 This phase of the protocol will quantify validity and consistency across individuals and different types  
25 of walking tasks in the real world. It will be performed in a habitual environment  
26 (home/work/community/outdoor) chosen by the participants, without specific restrictions. The duration  
27 of the observation has been established as a trade-off between experimental, clinical and technical  
28 requirements.  
29  
30  
31  
32

33  
34 *Measurement tools*

35 *Reference systems*

36 Participants will be asked to wear the INDIP, which in this phase of the protocol will be used as a  
37 reference system for the quantification of the DMOs provided by the single sensor algorithms, as  
38 applied to the DynaPort MM+ data.  
39

40 In order to quantify the effects of contextual confounding factors, the participants will also be provided  
41 with a system detecting outdoors walking, gradient of descent/ascent (walking uphill/downhill). The  
42 system is developed as a mobile Android application (Aeqora app) and the device selected was a  
43 Samsung S9 with Android 10. The app is composed of three parts: (i) the core tracker, (ii) the interface  
44 and (iii) the server infrastructure collecting data across users. The core tracker, adapted from a library  
45 developed by the University of Sheffield [50], utilises the mobile phone's internal sensors to compute  
46 the type of activity (e.g., walking) and intensity (e.g., cadence) to identify geo-located bouts of  
47 movement. It operates in the background and senses mobility features through a range of sensors (e.g.,  
48 step counters, activity recognition, accelerometer, gyroscope, etc.) as well as from location services  
49 (GPS, network, Bluetooth, etc.). It collects the data and stores the raw sensor data into a local database  
50 in real time. A set of mechanisms have been developed to control access to this data, keep it secure, and  
51 regulate its use. First, no user identity information is sent within a single request as a token identifier is  
52  
53  
54  
55  
56  
57  
58  
59  
60

1  
2  
3 used. Additionally, a security layer is built based on Secure Socket Layer (SSL) and Transport Layer  
4 Security (TLS) 3.0 protocol to the data with scalable and efficient encryption algorithms. An SSL/TLS  
5 certificate is issued and used to establish identity and trust between server and client apps (desktop and  
6 mobile), ensuring privacy and security whenever communicating sensitive data.  
7

8  
9 Data collected during the experiments will be sent to a cluster of servers that uses algorithms to integrate  
10 the phone's data with contextual information about the locations where the participant will walk: where  
11 possible walks will be matched to OpenStreetMap [51] roads and paths, to remove GPS noise, the slope  
12 variation of each walk is computed on tiles, with a resolution of 5m within the UK (using Ordnance  
13 Survey Terrain 5) [52] and 30m in the other locations (using NASA's Shuttle Radar Topography  
14 Mission (SRTM) data [53], indoors and outdoors walking is recognised. Moreover, weather is  
15 associated with participant location based on the most proximate weather station.  
16

17  
18 The use of walking aids will also be monitored in this phase. For this purpose, a Bluetooth beacon  
19 (BlueBeacon Tag, BlueUp) will be attached to the walking aid and its activity will be detected by the  
20 phone's mobile tracker and saved by the app. The distance between the phone and the Beacon and data  
21 from the accelerometer contained in the Beacon will be integrated to determine when the aid is in use.  
22

23  
24 The above contextual factors and the use of walking aids will be included in the analyses to determine  
25 the extent to which they affect variation in the DMOs, although the degree of correlation will be  
26 adversely affected by the issues in accurately measuring context that are associated with missing data  
27 and GPS accuracy.  
28

### 29 Mobility Tasks

30  
31 To capture the largest possible range of activities during this assessment, participants will be guided by  
32 the following list of activities to be included: if relevant for their chosen environment, rise from a chair  
33 and walk to another room; walk to the kitchen and make a drink; walk up and down a set of stairs (if  
34 possible); walk outdoors (if possible, for a minimum of two minutes); if walking outside, walk up and  
35 down an inclined path. No supervision or structure to how these tasks should be completed will be given  
36 to the participants.  
37

### 38 **c. Real - world validation: seven days monitoring**

39  
40 This observation will quantify the effects of device wearing time, hourly and daily fluctuations of  
41 DMO's, and contextual confounding factors (such as location of the walk, weather, type of housing,  
42 etc.).  
43

### 44 Measurement tools

45  
46 The participants will be asked to wear the DynaPort MM+, and to carry a mobile phone equipped with  
47 the Aequora App. Bluetooth beacons will also be used to track the use of walking aids. The participants  
48 will wear the Dynaport MM+ at all times (including at night). As this device is not waterproof, they  
49  
50  
51  
52  
53  
54  
55  
56  
57  
58  
59  
60

1  
2  
3 will be instructed to remove it for showering, bathing, using a sauna and swimming and reattach it  
4 afterwards. They will be asked to keep the mobile phone charged, switched on at all times and to carry  
5 it with them whenever possible, especially when leaving the house.  
6  
7

### 8 Mobility Tasks

9 Participants will be monitored continuously for seven days, without any specific instruction being  
10 provided, except for that of wearing the provided measurement tools.  
11  
12

### 13 **3.3 Assessment of participants' and assessors' experience**

14 This part of the study will evaluate the participants' and assessors' experience of using the monitoring  
15 device. For the participant's assessment, wear-time of the device during the 7 days monitoring will be  
16 collected as a primary measure of compliance. Following the period of the seven-day, free-living data  
17 collection, participants will complete two questionnaires to assess the acceptability of the device. The  
18 first is a 12-item questionnaire [54] investigating usability on a 5-point ordinal scale. The questions are  
19 simple and focus on the impact of using a wearable device on participants' feelings, comfort and the  
20 ease of use of the device. The second questionnaire is the Comfort Rating Scale, [55] a 6-item measure  
21 investigating the comfort of a wearable device on a 21-point ordinal scale from '0 – low agreement' to  
22 '20 – high agreement'.  
23  
24

25 A subset of participants from all recruiting sites and cohorts will complete a semi-structured interview  
26 (see supplementary file). For this qualitative part of the study, sampling will continue until saturation,  
27 i.e. until no additional learning is identified from the data. The interview will explore participants'  
28 opinions on the use of wearable devices and digital technology in healthcare, experiences of managing  
29 their condition, experiences of technology, and opinions on data privacy associated with the use of  
30 technology in healthcare. Additionally, participants will be asked about their experiences of using the  
31 device, including comfort, perceived usefulness and ease of use, barriers and facilitators, and any other  
32 usability experiences that they may have encountered. All interviews will be audio-recorded,  
33 transcribed verbatim and, where required, translated to English.  
34  
35

36 To assess the professionals' experience, assessors from each of the clinical sites will be asked to assess  
37 the usability of the device after completion of the data collection. They will be provided with three  
38 questionnaires: 1) The System Usability Scale [56] a commonly used, validated 10-item questionnaire  
39 that asks users to rate a device on a 5-point Likert scale from '1 strongly disagree' to '5 – strongly  
40 agree'. Questions focus on the ease of use of the device, and the integration of various functions within  
41 it; 2) The IBM Computer System Usability Questionnaire [57] (to assess the DynaPort MM+ software),  
42 is composed of 19 items and asks respondents to consider their interaction with a computer system on  
43 a 7-point Likert scale from the perspective of data collection; 3) A bespoke questionnaire designed  
44 specifically for the TVS to assess the acceptability and effectiveness of the training methods,  
45 procedures, and any other materials provided within the study. The questionnaire will ask respondents  
46 to rate their experiences on a 7-point Likert scale to determine whether any changes to the procedures  
47  
48  
49  
50  
51  
52  
53  
54  
55  
56  
57  
58  
59  
60



1  
2  
3 and materials are required, and whether training was effective in preparing assessors to implement the  
4 assessment protocol as planned.

5  
6 In addition, assessors will complete a semi-structured interview with the aim of exploring their  
7 experiences of the data collection process. Assessors will be asked about the use of the device (e.g.,  
8 ease of use, intuitiveness, data collection and download procedures, etc.), training and materials  
9 provided prior to the commencement of the study, and barriers and facilitators to using the device. The  
10 topic guide and open-ended questions allow for new areas of conversation to emerge. All interviews  
11 will be audio-recorded and transcribed verbatim.  
12  
13  
14  
15

### 16 17 **3.4 Data management**

18 All data will be uploaded to a central platform "e-Science Central" (e-SC) [58] which provides data  
19 processing and storage functionality in accordance with principles of reproducible research. The  
20 underlying infrastructure complies with ISO 27000 standards for Information Security Management  
21 Systems and is hosted on Amazon Web Service secure services cloud platform. Data will be integrated  
22 on the platform by means of implementation of a standardised file nomenclature system. At point of  
23 capture, each file will be labelled in standardised format. For source data, we will adhere to principles  
24 defined by the US Food and Drug Administration [59] for making them attributable, legible,  
25 contemporaneous, original, and accurate (ALCOA+). In particular, we will use both web-based forms  
26 on e-SC and an application from ERT (partner in the project) to capture the electronic clinical outcome  
27 assessments (eCOAs). The e-SC forms provide storage of event data, and support for data validation  
28 and basic data entry and verification. Both e-SC and ERT systems employ error-handling at source  
29 which alert the assessors of incorrect data entry (e.g., min/max boundaries, required/optional fields).  
30 Data captured at source on paper will be copied, signed, and scanned, then uploaded to e-SC as a  
31 certified copy. The motion capture data will also be transferred to e-SC and stored in an unmodified  
32 form. These data will be either uploaded directly to e-SC via the e-SC portal or transferred via an  
33 Application Programming Interface (API). The algorithms being developed and benchmarked will be  
34 used to process these files and extract and store the DMOs.  
35  
36  
37  
38  
39  
40  
41  
42  
43  
44  
45  
46

### 47 **3.5 Data analysis plan**

#### 48 **3.5.1 Verification of the device**

49 Mean and standard deviation readings of the accelerometer, gyroscope, and magnetometer signals  
50 captured during static acquisition will be used to assess the reliability of the manufacturer sensor  
51 calibration and to detect the presence of abnormal spikes in the sensor signals. Data from long static  
52 acquisitions will be used to confirm the stability of sampling frequency, the duration of the battery, and  
53 to estimate the Allan deviation (bias instability) of the gyroscope readings over time. Errors of  
54  
55  
56  
57  
58  
59  
60

gyroscope readings will be assessed using mean and standard deviation of nominal, measured and relevant errors for angular velocity values during the dynamic acquisitions.

### 3.5.2 Validation of the algorithms

The data analysis will determine criterion validity (including selected performance metrics and criterion (concurrent) validity metrics of the primary (real world walking speed, RWS) and secondary DMOs listed in Table 5. Table 6 summarises the statistical tools that will be used to quantify each of the DMOs. All statistical analyses will be performed using the statistical analysis toolbox of Matlab R2018a. In all tasks and observations, continuous variables (e.g., cadence, real-walking-speed) will be summarised with descriptive statistics for the values obtained within walking bouts (mean and standard deviation). In addition, the mean, minimum, maximum, standard deviation, median, interquartile range (IQR) and Root Mean Square Error (RMSE) of DMOs over all available walking bouts will be presented. Categorical variables (e.g., laterality of initial contacts) will be summarised with frequency counts and percentages. Confidence Interval 95% (CI) will be provided for the Interclass Correlation Coefficients (ICC).

Using the gold standard as a reference, True Positives (TP), False Positives (FP), True Negatives (TN) and False Negatives (FN) will be identified for the DMOs identified from the single device using a cut-off tolerance window defined as a fixed interval of 0.5 seconds [60] and centred on each event detected by the reference system. The following performance metrics will then be calculated:

$$\text{Sensitivity} = \frac{TP}{TP + FN}$$

$$\text{Positive Predicted Value} = \frac{TP}{TP + FP}$$

$$\text{Accuracy} = \frac{TP + TN}{TP + TN + FP + FN}$$

$$\text{Specificity} = \frac{TN}{TN + FP} \text{ and}$$

$$\text{F1 score} = 2 * \frac{\text{Positive Predicted Value} * \text{Sensitivity}}{\text{Positive Predicted Value} + \text{Sensitivity}}$$

Criterion validity will be characterised by evaluating the absolute and relative errors, defined as the relative and absolute differences between the DMOs quantified with the single device and those derived from the reference systems:

$$\text{Relative error} = \left( \frac{\text{DMO estimated by IMU} - \text{DMO estimated by Reference System}}{\text{DMO estimated by RS}} \right) \times 100$$

$$\text{Absolute Error (DMO)} = |\text{DMO estimated by IMU} - \text{DMO estimated by Reference System}|$$

1  
2  
3 The mean, standard deviation and maximum of all errors will be reported for each walking bout. Limits  
4 of agreement between single sensor and reference system DMOs will be quantified. In addition,  
5 statistically significant differences between the DMOs quantified by the IMU and those by the reference  
6 system, parametric (paired t-test) or non-parametric (Wilcoxon signed-rank test) tests will be performed  
7 depending on the normality of the distribution of the DMOs. Data distribution will be visually inspected  
8 with histograms, and normality tested with the Shapiro-Wilk test.  
9

10  
11  
12 Concurrent validity between the DMOs quantified by the single device and those derived from the  
13 reference systems will be evaluated by quantifying the Intraclass Correlation Coefficient (ICC (2,1)).  
14

15 All results will be presented separately by cohort (e.g., PD) and subgroup (i.e., subgroups of the cohorts)  
16 stratified by average stride gait speed (e.g., fast speed: walking speed > 1 m/s, medium speed: walking  
17 speed between 0.5m/s and 1 m/s, slow speed: walking speed < 0.5 m/s) [2].  
18

19 If participants do not participate in one assessment (e.g., one of the tasks in the laboratory) or  
20 observation (e.g., 2.5hs), their remaining available data corresponding to remaining  
21 assessments/observations will still be included in the analyses. Within each of the  
22 contexts/assessments/observations, and assuming that data are missing completely at random, a  
23 complete case approach will be used to handle missing data [61].  
24  
25  
26  
27  
28  
29  
30  
31  
32  
33  
34  
35  
36  
37  
38  
39  
40  
41  
42  
43  
44  
45  
46  
47  
48  
49  
50  
51  
52  
53  
54  
55  
56  
57  
58  
59  
60

**Table 5 List of digital mobility outcomes (primary and secondary DMOs) that will be analysed as part of the TVS.**

| Variables                                                                                                                                                                                                            | DMOs (units)             | Definition                                                                                                         | DMO Attainable |           |       |            |
|----------------------------------------------------------------------------------------------------------------------------------------------------------------------------------------------------------------------|--------------------------|--------------------------------------------------------------------------------------------------------------------|----------------|-----------|-------|------------|
|                                                                                                                                                                                                                      |                          |                                                                                                                    | DynaPort MM+   | SP System | INDIP | Aeqora App |
| <b>Walking Bout (WB)</b><br><i>A walking sequence containing at least two consecutive strides of both feet. Start and end of a WB are determined by a resting period or any other activity (non-walking period).</i> | Number of WBs (count)    | Based on the identification of gait as an activity (yes/no) to a sample level of 0.1 s                             | ✓              | ✓         | ✓     | ✓          |
|                                                                                                                                                                                                                      | WB Start (s)             | Start of WB                                                                                                        | ✓              | ✓         | ✓     |            |
|                                                                                                                                                                                                                      | WB End (s)               | End of WB                                                                                                          | ✓              | ✓         | ✓     |            |
|                                                                                                                                                                                                                      | WB Duration (s)          | Time between start and the end of WB                                                                               | ✓              | ✓         | ✓     |            |
| <b>Stride/ Step Duration (SD)</b><br><i>Refers to the duration (time intervals) of strides/steps, calculated as the time in between two non-consecutive (alternate) initial contacts.</i>                            | Stride Duration (s)      | Duration between two non-consecutive (alternate) initial contact events                                            | ✓              | ✓         | ✓     |            |
|                                                                                                                                                                                                                      | Step Duration (s)        | Duration between two consecutive initial contact events                                                            | ✓              | ✓         | ✓     |            |
| <b>Cadence (CE)</b>                                                                                                                                                                                                  | Cadence (steps/minute)   | Steps performed within a minute                                                                                    | ✓              | ✓         | ✓     |            |
| <b>Stride Length (SL)</b>                                                                                                                                                                                            | Mean Stride Length (m)   | Average stride length within a WB                                                                                  | ✓              | ✓         | ✓     |            |
| <b>Real World Walking Speed (RWS)</b>                                                                                                                                                                                | Walking speed (m/s)      | Velocity, average stride speed within a WB                                                                         | ✓              | ✓         | ✓     | ✓          |
| <b>Turning</b>                                                                                                                                                                                                       | Number of Turns          | Overall number of turns performed in a WB based on the identification of turns (yes/no) to a sample level of 0.1 s | ✓              | ✓         | ✓     |            |
|                                                                                                                                                                                                                      | Turn Start (s)           | Start of each turn within the WB                                                                                   | ✓              | ✓         | ✓     |            |
|                                                                                                                                                                                                                      | Turn End (s)             | End of each turn within the WB                                                                                     | ✓              | ✓         | ✓     |            |
|                                                                                                                                                                                                                      | Turn Duration (s)        | Time between the start and the end of the turns within the WB                                                      | ✓              | ✓         | ✓     |            |
|                                                                                                                                                                                                                      | Maximal Turn Angle (deg) | Maximal angle achieved in the turn                                                                                 | ✓              | ✓         | ✓     |            |

|    |                                  |                                                                                                                          |                                                                                                                                                       |   |   |   |
|----|----------------------------------|--------------------------------------------------------------------------------------------------------------------------|-------------------------------------------------------------------------------------------------------------------------------------------------------|---|---|---|
| 1  |                                  |                                                                                                                          |                                                                                                                                                       |   |   |   |
| 2  |                                  |                                                                                                                          |                                                                                                                                                       |   |   |   |
| 3  | <b>Height Estimation</b>         | Elevation Change (m)                                                                                                     | Difference between the minimal and maximal height or elevation for the complete walking bout detected for incline walking                             | ✓ | ✓ | ✓ |
| 4  |                                  |                                                                                                                          |                                                                                                                                                       |   |   |   |
| 5  |                                  |                                                                                                                          |                                                                                                                                                       |   |   |   |
| 6  |                                  |                                                                                                                          |                                                                                                                                                       |   |   |   |
| 7  | <b>Left/Right Identification</b> | Laterality (label)                                                                                                       | Left or Right category, indicating the foot with which the initial contact is performed                                                               | ✓ | ✓ | ✓ |
| 8  |                                  |                                                                                                                          |                                                                                                                                                       |   |   |   |
| 9  |                                  | Number of Final Contact Events (counts)                                                                                  | Correct identification of Final Contact events                                                                                                        | ✓ | ✓ | ✓ |
| 10 |                                  |                                                                                                                          |                                                                                                                                                       |   |   |   |
| 11 |                                  |                                                                                                                          |                                                                                                                                                       |   |   |   |
| 12 |                                  | Final Contact Event (s)                                                                                                  | Instant of time at which each final contact event is performed within a walking bout                                                                  | ✓ | ✓ | ✓ |
| 13 |                                  |                                                                                                                          |                                                                                                                                                       |   |   |   |
| 14 |                                  |                                                                                                                          |                                                                                                                                                       |   |   |   |
| 15 |                                  | Swing Phase Duration (s)                                                                                                 | Time between the last contact of the current footfall and the first contact of the next footfall on the same foot                                     | ✓ | ✓ | ✓ |
| 16 |                                  |                                                                                                                          |                                                                                                                                                       |   |   |   |
| 17 |                                  |                                                                                                                          |                                                                                                                                                       |   |   |   |
| 18 |                                  |                                                                                                                          |                                                                                                                                                       |   |   |   |
| 19 | <b>Secondary Outcomes (SO)</b>   | Stance Phase Duration (s)                                                                                                | Time in between the first contact and the last contact of two consecutive footfalls on the same foot                                                  | ✓ | ✓ | ✓ |
| 20 |                                  |                                                                                                                          |                                                                                                                                                       |   |   |   |
| 21 |                                  |                                                                                                                          |                                                                                                                                                       |   |   |   |
| 22 |                                  | Variability of: Step Time, Stride Time, Swing Time, Stance Time, Stride Velocity, Stride Length (same units as variable) | St. Dev. and Coefficient of Variation of step time, of stride time, of swing time, of stance time, of stride velocity and stride length within a WB   | ✓ | ✓ | ✓ |
| 23 |                                  |                                                                                                                          |                                                                                                                                                       |   |   |   |
| 24 |                                  |                                                                                                                          |                                                                                                                                                       |   |   |   |
| 25 |                                  |                                                                                                                          |                                                                                                                                                       |   |   |   |
| 26 |                                  |                                                                                                                          |                                                                                                                                                       |   |   |   |
| 27 |                                  |                                                                                                                          |                                                                                                                                                       |   |   |   |
| 28 |                                  | Asymmetry of: Step Time, Stride Time, Swing Time, Stance Time (same units as variable)                                   | Asymmetry evaluated as difference between right and left steps or strides for step time, of stride time, of swing time and of stance time within a WB | ✓ | ✓ | ✓ |
| 29 |                                  |                                                                                                                          |                                                                                                                                                       |   |   |   |
| 30 |                                  |                                                                                                                          |                                                                                                                                                       |   |   |   |
| 31 |                                  |                                                                                                                          |                                                                                                                                                       |   |   |   |
| 32 | <b>Contextual Factors</b>        | Location (label indoor/outdoor)                                                                                          | WB completed in an indoor or outdoor environment                                                                                                      | ✓ |   | ✓ |
| 33 |                                  |                                                                                                                          |                                                                                                                                                       |   |   |   |
| 34 |                                  | Walking Aid (label yes/no)                                                                                               | Walking aid assistance during WB                                                                                                                      | ✓ |   | ✓ |
| 35 |                                  |                                                                                                                          |                                                                                                                                                       |   |   |   |
| 36 |                                  |                                                                                                                          |                                                                                                                                                       |   |   |   |
| 37 |                                  |                                                                                                                          |                                                                                                                                                       |   |   |   |
| 38 |                                  |                                                                                                                          |                                                                                                                                                       |   |   |   |
| 39 |                                  |                                                                                                                          |                                                                                                                                                       |   |   |   |
| 40 |                                  |                                                                                                                          |                                                                                                                                                       |   |   |   |
| 41 |                                  |                                                                                                                          |                                                                                                                                                       |   |   |   |
| 42 |                                  |                                                                                                                          |                                                                                                                                                       |   |   |   |
| 43 |                                  |                                                                                                                          |                                                                                                                                                       |   |   |   |
| 44 |                                  |                                                                                                                          |                                                                                                                                                       |   |   |   |
| 45 |                                  |                                                                                                                          |                                                                                                                                                       |   |   |   |
| 46 |                                  |                                                                                                                          |                                                                                                                                                       |   |   |   |

**Table 6.** List of statistical analyses and performance metrics that will be used for the various digital mobility outcomes (DMOs). Performance metrics and criterion validity are those that will be used to compare DMOs obtained from a single device versus those obtained from the reference system. The types of plots listed in the table will be used to visualise performance metrics and to support interpretation of the results.

| DMO                     | PERFORMANCE METRIC |                           |          |             |          | CRITERION VALIDITY          |                   |                         |           |                           | PLOTS                  |                    |                    |                               |                 |
|-------------------------|--------------------|---------------------------|----------|-------------|----------|-----------------------------|-------------------|-------------------------|-----------|---------------------------|------------------------|--------------------|--------------------|-------------------------------|-----------------|
|                         | Sensitivity        | Positive Predictive Value | Accuracy | Specificity | F1-score | Error (absolute & relative) | SD & Max of Error | Root Mean Squared Error | Precision | Concurrent validity (ICC) | Significant Difference | Limit of Agreement | Bland Altman Plots | Scatter Plots for Correlation | Histogram Plots |
| Number of Walking Bouts | ✓                  | ✓                         | ✓        | ✓           | ✓        |                             |                   |                         |           |                           |                        |                    |                    |                               |                 |
| WB Start                |                    |                           |          |             |          | ✓                           | ✓                 | ✓                       | ✓         |                           |                        |                    | ✓                  | ✓                             | ✓               |
| WB End                  |                    |                           |          |             |          | ✓                           | ✓                 | ✓                       | ✓         |                           |                        |                    | ✓                  | ✓                             | ✓               |
| WB Duration             |                    |                           |          |             |          | ✓                           | ✓                 | ✓                       | ✓         | ✓                         | ✓                      | ✓                  | ✓                  | ✓                             | ✓               |
| Initial Contact Events  | ✓                  | ✓                         |          |             | ✓        |                             |                   |                         |           |                           |                        |                    |                    |                               |                 |
| Step Duration           |                    |                           |          |             |          | ✓                           | ✓                 | ✓                       | ✓         | ✓                         | ✓                      | ✓                  | ✓                  | ✓                             | ✓               |
| Stride Duration         |                    |                           |          |             |          | ✓                           | ✓                 | ✓                       | ✓         | ✓                         | ✓                      | ✓                  | ✓                  | ✓                             | ✓               |
| Final Contact Events    | ✓                  | ✓                         |          |             | ✓        |                             |                   |                         |           |                           |                        |                    |                    |                               |                 |
| Mean Stride Length      |                    |                           |          |             |          | ✓                           | ✓                 | ✓                       | ✓         | ✓                         | ✓                      | ✓                  | ✓                  | ✓                             | ✓               |
| Cadence                 |                    |                           |          |             |          | ✓                           | ✓                 | ✓                       | ✓         | ✓                         | ✓                      | ✓                  | ✓                  | ✓                             | ✓               |
| Elevation Change        |                    |                           |          |             |          | ✓                           | ✓                 | ✓                       | ✓         | ✓                         | ✓                      | ✓                  | ✓                  | ✓                             | ✓               |
| Walking Speed           |                    |                           |          |             |          | ✓                           | ✓                 | ✓                       | ✓         | ✓                         | ✓                      | ✓                  | ✓                  | ✓                             | ✓               |
| Number of Turns         | ✓                  | ✓                         | ✓        | ✓           | ✓        |                             |                   |                         |           |                           |                        |                    |                    |                               |                 |
| Turn Start              |                    |                           |          |             |          | ✓                           | ✓                 | ✓                       | ✓         |                           |                        |                    | ✓                  | ✓                             | ✓               |
| Turn End                |                    |                           |          |             |          | ✓                           | ✓                 | ✓                       | ✓         |                           |                        |                    | ✓                  | ✓                             | ✓               |
| Turn Duration           |                    |                           |          |             |          | ✓                           | ✓                 | ✓                       | ✓         | ✓                         | ✓                      | ✓                  | ✓                  | ✓                             | ✓               |
| Maximal Turn Angle      |                    |                           |          |             |          | ✓                           | ✓                 | ✓                       | ✓         | ✓                         | ✓                      | ✓                  | ✓                  | ✓                             | ✓               |
| Laterality              |                    |                           |          |             |          | ✓                           | ✓                 | ✓                       | ✓         | ✓                         |                        |                    |                    |                               |                 |
| Sequence Order          |                    |                           |          |             |          | ✓                           | ✓                 | ✓                       |           |                           |                        |                    |                    |                               |                 |

### 3.5.3 Participants’ and assessors’ experience

Participant and professional questionnaire data will be analysed using descriptive statistics. Interviews will be analysed using thematic analysis. [62] Transcripts will be deductively examined for the presence of themes related to the acceptability of the monitoring device to participants (i.e., comfort, interference with daily living) based on previous literature. Specifically, perceived usefulness, comfort, and ease of use are critical factors of usability thus, these will be the categories examined within the transcripts. Regarding participants use of technology to manage their healthcare condition an inductive approach will be taken. A list of codes relevant to the question will be generated and then refined by grouping them into potential themes.

#### Authors’ contributions:

This study is part of a large collaborative initiative, evolving around the design and execution of the study here described. The complexity of the protocol and the highly multi-disciplinary content of the

1  
2  
3 study justifies the high number of authors that have been and will be involved in the different stages of  
4 its planning, conducting and in the design of the analysis plan.

5  
6 Manuscript initial drafting: CM, TB, SDD, AC, LA, AK, KS, SB, FC, LR. Design and deployment of  
7 experimental tools and protocols: KS, LS, CM, TB, EB, FC, NI, BS, LV, IV, EH, NC, FS. AC, MC,  
8 SB, LRO, AY, CK, EA, LS, CB, WM, CH, EW, JHA, EG, MB; J, MN, KT, BV, JHE, AK, DS, AM,  
9 VL. Data collection: LA, TB, PB, MB, EB, CF, EG, CH, EH, WM, CB, LP, LS, KS, BS, LVG, IV,  
10 AY, EW. Data analysis and algorithm development: SDD, EA, HS, AS, BE, FK, AK, MU, AC, JG,  
11 SK, LC, LP, LR, HH, EG. Draft revisions: LRO, KA, BE, JHA, BV, HS, AM, JHO, PB, FK, BC, AK,  
12 LC, LP, EB, KS, SK, LP, HH, WM, NC, BS, AI, IN, VL, SDD. Study design and coordination: CM,  
13 LRO, AM, SDD, AC. All authors have read and approved the final manuscript.

### 14 15 16 17 18 19 **Competing interests statement**

20  
21 Fabio Ciravegna is CEO and shareholder of Aeqora Ltd, of which Vitaveska Lanfranchi is director and  
22 shareholder. Henrik Sillén is an employee of AstraZeneca. Bjoern M Eskofier is co-founder and owns  
23 shares of Portables HealthCare Technologies GmbH. McRoberts is the manufacturer of the DynaPort.  
24 Martijn Niessen, Jordi Evers, and Lucas Pluimgraaff are employees of McRoberts. Arne Mueller is an  
25 employee of Novartis and holds stock in Novartis. Lars Schwickert and Clemens Becker are consultants  
26 of Philipps Healthcare, Bosch Healthcare, Eli Lilly, Gait-up. Jeffrey M. Hausdorff reports having  
27 submitted a patent for assessment of mobility using wearable sensors in 400 Parkinson's disease; the  
28 intellectual property rights 401 are held by the Tel Aviv Medical Center. Luca Palmerini and Lorenzo  
29 Chiari are co-founders and own shares of mHealth Technologies.

### 30 31 32 33 34 35 **Funding**

36  
37 This study was co-funded by the European Union's Horizon 2020 research and innovation programme  
38 and EFPIA via the Innovative Medicine Initiative 2 (Mobilise-D project, grant number IMI22017-13-  
39 7-820820). The views expressed are those of the authors and not necessarily those of the IMI, the  
40 European Union, the EFPIA, or any Associated Partners. We acknowledge the support of Grünenthal  
41 GmbH via the funding of a PhD scholarship directly dedicated to the technical validation protocol.

42  
43 We acknowledge support from the Spanish Ministry of Science and Innovation through the "Centro de  
44 Excelencia Severo Ochoa 2019-2023" Program (CEX2018-000806-S), and support from the  
45 Generalitat de Catalunya through the CERCA Program.

46  
47 SDD, AJY and LR are also supported by the Newcastle Biomedical Research Centre (BRC) based at  
48 Newcastle upon Tyne and Newcastle University. CM, BS, LVG and EB are also supported by the  
49 Sheffield Biomedical Research Centre (BRC) based at the Sheffield Teaching Hospital and the  
50 University of Sheffield. The work was also supported by the NIHR/Wellcome Trust Clinical Research  
51 Facility (CRF) infrastructure at Newcastle upon Tyne Hospitals NHS Foundation Trust and the CRF at  
52 the Sheffield Teaching Hospital. The views expressed are those of the author(s) and not necessarily  
53 those of the NIHR or the Department of Health and Social Care or the funders.

## References

- 1 Team WHOD of MH and SA and WHO and WHOD of MH and SAMH and WHOMHE an. *Mental health atlas 2005*. World Health Organisation 2005.
- 2 Studenski S, Perera S, Patel K, *et al*. Gait Speed and Survival in Older Adults. *JAMA* 2011;**305**:50–8. doi:10.1001/jama.2010.1923
- 3 Perera S, Patel K V, Rosano C, *et al*. Gait Speed Predicts Incident Disability: A Pooled Analysis. *Journals Gerontol Ser A* 2016;**71**:63–71. doi:10.1093/gerona/glv126
- 4 Rochester L, Mazzà C, Mueller A, *et al*. A Roadmap to Inform Development, Validation and Approval of Digital Mobility Outcomes: The Mobilise-D Approach. *Digit Biomarkers* 2020;**4**:13–27. doi:10.1159/000512513
- 5 Del Din S, Godfrey A, Mazzà C, *et al*. Free-living monitoring of Parkinson’s disease: Lessons from the field. *Mov Disord* 2016;**31**:1293–313. doi:10.1002/mds.26718
- 6 Bonci T, Keogh A, Din S Del, *et al*. An objective methodology for the selection of a device for continuous mobility assessment. *Sensors (Switzerland)* 2020;**20**:1–16. doi:10.3390/s20226509
- 7 Gao Y, Li H, Luo Y. An empirical study of wearable technology acceptance in healthcare. *Ind Manag Data Syst* 2015;**115**:1704–23. doi:10.1108/IMDS-03-2015-0087
- 8 Jia Y, Wang W, Wen D, *et al*. Perceived user preferences and usability evaluation of mainstream wearable devices for health monitoring. *PeerJ* 2018;**2018**:1–17. doi:10.7717/peerj.5350
- 9 Puri A, Kim B, Nguyen O, *et al*. User acceptance of wrist-worn activity trackers among community-dwelling older adults: Mixed method study. *JMIR mHealth uHealth* 2017;**5**. doi:10.2196/mhealth.8211
- 10 Viceconti M, Penna SH, Dartee W, *et al*. Toward a regulatory qualification of real-world mobility performance biomarkers in parkinson’s patients using digital mobility outcomes. *Sensors (Switzerland)* 2020;**20**:1–13. doi:10.3390/s20205920
- 11 Mobilise-D website. <https://www.mobilise-d.eu/> (accessed 18 Feb 2021).
- 12 Bartlett JW, Frost C. Reliability, repeatability and reproducibility: Analysis of measurement errors in continuous variables. *Ultrasound Obstet Gynecol* 2008;**31**:466–75. doi:10.1002/uog.5256
- 13 Letter of support for Mobilise-D digital mobility outcomes as monitoring biomarkers. [https://www.ema.europa.eu/en/documents/other/letter-support-mobilise-d-digital-mobility-outcomes-monitoring-biomarkers\\_en.pdf](https://www.ema.europa.eu/en/documents/other/letter-support-mobilise-d-digital-mobility-outcomes-monitoring-biomarkers_en.pdf) (accessed 18 Feb 2021).



- 1  
2  
3  
4  
5 14 Systems M, Development S, Devices E. *IEEE Standard for Sensor Performance Parameter*  
6 *Definitions*. 2014.  
7  
8  
9 15 El-Sheimy N, Hou H, Niu X. Analysis and modeling of inertial sensors using allan variance.  
10 *IEEE Trans Instrum Meas* 2008;**57**:140–9. doi:10.1109/TIM.2007.908635  
11  
12 16 Hussen AA, Jleta IN. Low-Cost Inertial Sensors Modeling Using Allan Variance. *Int Sch Sci*  
13 *Res Innov* 2015;**9**:1069–74.  
14  
15  
16 17 IEEE Aerospace and Electronic Systems Society (institution). *IEEE Standard Specification*  
17 *Format Guide and Test Procedure for Single-Axis Laser Gyros*. 1995.  
18  
19 20 Ferraris F, Gorini I, Grimaldi U, *et al*. Calibration of three-axial rate gyros without angular  
21 velocity standards. *Sensors Actuators, A Phys* 1994;**42**:446–9. doi:10.1016/0924-  
22 4247(94)80031-6  
23  
24 25 Stančin S, Tomažič S. Time- and computation-efficient calibration of MEMS 3D  
26 accelerometers and gyroscopes. *Sensors (Switzerland)* 2014;**14**:14885–915.  
27 doi:10.3390/s140814885  
28  
29 30 Kluge F, Del Din S, Cereatti A, *et al*. Consensus based framework for digital mobility  
31 monitoring. *medRxiv*. 2021;**1**:12 .doi:https://doi.org/10.1101/2020.12.18.20248404  
32  
33 34 COSMIN. <https://www.cosmin.nl/> (accessed 18 Feb 2021).  
35  
36 37 Nasreddine ZS, Phillips NA, Bédirian V, *et al*. The Montreal Cognitive Assessment, MoCA: A  
38 Brief Screening Tool For Mild Cognitive Impairment. *J Am Geriatr Soc* 2005;**53**:695–9.  
39 doi:https://doi.org/10.1111/j.1532-5415.2005.53221.x  
40  
41 42 Postuma RB, Berg D, Stern M, *et al*. MDS clinical diagnostic criteria for Parkinson’s disease.  
43 *Mov Disord* 2015;**30**:1591–601. doi:10.1002/mds.26424  
44  
45 46 Jette AM, Haley SM, Coster WJ, *et al*. Late Life Function and Disability Instrument: I.  
47 Development and Evaluation of the Disability Component. *Journals Gerontol Ser A*  
48 2002;**57**:M209–16. doi:10.1093/gerona/57.4.M209  
49  
50 51 Haley SM, Jette AM, Coster WJ, *et al*. Late Life Function and Disability Instrument: II.  
52 Development and Evaluation of the Function Component. *Journals Gerontol Ser A*  
53 2002;**57**:M217–22. doi:10.1093/gerona/57.4.M217  
54  
55 56 Goetz CG, Tilley BC, Shaftman SR, *et al*. Movement Disorder Society-sponsored revision of  
57 the Unified Parkinson’s Disease Rating Scale (MDS-UPDRS): Scale presentation and  
58 clinimetric testing results. *Mov Disord* 2008;**23**:2129–70.  
59 doi:https://doi.org/10.1002/mds.22340  
60

- 1  
2  
3 27 Kurtzke JF. Rating neurologic impairment in multiple sclerosis. *Neurology* 1983;**33**:1444 LP –  
4 1444. doi:10.1212/WNL.33.11.1444  
5  
6  
7 28 Gupta N, Pinto LM, Morogan A, *et al.* The COPD assessment test: a systematic review. *Eur*  
8 *Respir J* 2014;**44**:873 LP – 884. doi:10.1183/09031936.00025214  
9  
10  
11 29 Green CP, Porter CB, Bresnahan DR, *et al.* Development and evaluation of the Kansas City  
12 Cardiomyopathy Questionnaire: a new health status measure for heart failure. *J Am Coll*  
13 *Cardiol* 2000;**35**:1245–55. doi:10.1016/S0735-1097(00)00531-3  
14  
15  
16 30 Chiari L, Della Croce U, Leardini A, *et al.* Human movement analysis using  
17 stereophotogrammetry: Part 2: Instrumental errors. *Gait & posture* 2005; **21**:197-211.  
18 doi:10.1016/j.gaitpost.2004.04.004  
19  
20  
21 31 Di Marco R, Rossi S, Castelli E, *et al.* Effects of the calibration procedure on the metrological  
22 performances of stereophotogrammetric systems for human movement analysis. *Meas J Int*  
23 *Meas Confed* 2017;**101**:265–71. doi:10.1016/j.measurement.2016.01.008  
24  
25  
26 32 Trojaniello D, Cereatti A, Croce U Della. Gait direction of progression changes using shank  
27 worn MIMUs. In: *GBN Conference, Pavia*. 2014.  
28  
29  
30 33 Salis F, Bertuletti S, Caruso M, *et al.* Multi-sensor integration and data fusion for enhancing  
31 gait assessment in and out of the laboratory. *Gait Posture* 2019;**74**:34.  
32 doi:10.1016/j.gaitpost.2019.07.493  
33  
34  
35 34 Bertuletti S, Della Croce U, Cereatti A. A wearable solution for accurate step detection based  
36 on the direct measurement of the inter-foot distance. *J Biomech* 2019;**84**:274–7.  
37 doi:https://doi.org/10.1016/j.jbiomech.2018.12.039  
38  
39  
40 35 Caruso, M.; Sabatini, A.M.; Laidig, D.; Seel, T.; Knaflitz, M.; Della Croce, U.; Cereatti, A.  
41 Analysis of the Accuracy of Ten Algorithms for Orientation Estimation Using Inertial and  
42 Magnetic Sensing under Optimal Conditions: One Size Does Not Fit All. *Sensors* 2021;**21**;  
43 2543. doi:10.3390/s21072543  
44  
45  
46  
47 36 Caruso M, Sabatini AM, Knaflitz M, *et al.* Accuracy of the Orientation Estimate Obtained  
48 Using Four Sensor Fusion Filters Applied to Recordings of Magneto-Inertial Sensors Moving  
49 at Three Rotation Rates. In: *2019 41st Annual International Conference of the IEEE*  
50 *Engineering in Medicine and Biology Society (EMBC)*. 2019;2053–8.  
51 doi:10.1109/EMBC.2019.8857655  
52  
53  
54  
55 37 Skog I, Nilsson J, Händel P. Evaluation of zero-velocity detectors for foot-mounted inertial  
56 navigation systems. In: *2010 International Conference on Indoor Positioning and Indoor*  
57 *Navigation*. 2010;1–6. doi:10.1109/IPIN.2010.5646936  
58  
59  
60

- 1  
2  
3 38 Peruzzi A, Della Croce U, Cereatti A. Estimation of stride length in level walking using an  
4 inertial measurement unit attached to the foot: A validation of the zero velocity assumption  
5 during stance. *J Biomech* 2011;**44**:1991–4. doi:10.1016/j.jbiomech.2011.04.035  
6  
7  
8 39 Trojaniello D, Cereatti A, Pelosin E, *et al.* Estimation of step-by-step spatio-temporal  
9 parameters of normal and impaired gait using shank-mounted magneto-inertial sensors :  
10 application to elderly , hemiparetic , parkinsonian and choreic gait. 2014;**44**:152.  
11  
12  
13 40 Köse A, Cereatti A, Della Croce U. Bilateral step length estimation using a single inertial  
14 measurement unit attached to the pelvis. *J Neuroeng Rehabil* 2012;**9**. doi:10.1186/1743-0003-  
15 9-9  
16  
17  
18 41 Trojaniello D, Cereatti A, Ravaschio A, *et al.* Assessment of gait direction changes during  
19 straight-ahead walking in healthy elderly and Huntington Disease patients using a shank worn  
20 MIMU. In: *2014 36th Annual International Conference of the IEEE Engineering in Medicine*  
21 *and Biology Society*. 2014. 2508–11. doi:10.1109/EMBC.2014.6944132  
22  
23  
24  
25 42 Betoli M, Cereatti A, Trojaniello D, *et al.* Estimation of spatio-temporal parameters of gait  
26 from magneto-inertial measurement units: multicenter validation among Parkinson, mildly  
27 cognitively impaired and healthy older adults. *Biomedical engineering online*. 2018  
28 Dec;**17**(1):1-4. doi:10.1186/s12938-018-0488-2  
29  
30  
31  
32 43 Rossaningo R, Caruso M, Salis F, *et al.* An Optimal Procedure for Stride Length Estimation  
33 Using Foot-Mounted Magneto-Inertial Measurement Units. *2021 IEEE International*  
34 *Symposium on Medical Measurements and Applications (MeMeA)* 2021 Jun 23 (pp. 1-6).  
35 IEEE., doi: 10.1109/MeMeA52024.2021.9478604.  
36  
37  
38  
39 44 Salis F, Bertuletti S, Caruso M, *et al.* A novel multi-sensor system for gait assessment in real-  
40 world conditions: preliminary results. In: *Proceedings of GNB 2020*. 2020.  
41  
42  
43 45 Zijlstra W, Hof AL. Assessment of spatio-temporal gait parameters from trunk accelerations  
44 during human walking. *Gait Posture* 2003;**18**:1–10. doi:https://doi.org/10.1016/S0966-  
45 6362(02)00190-X  
46  
47  
48 46 Ngueleu AM, Blanchette AK, Bouyer L, *et al.* Design and accuracy of an instrumented insole  
49 using pressure sensors for step count. *Sensors (Switzerland)* 2019;**19**:12–4.  
50 doi:10.3390/s19050984  
51  
52  
53 47 Nightingale CJ, Mitchell SN, Butterfield SA. Validation of the Timed Up and Go Test for  
54 Assessing Balance Variables in Adults Aged 65 and Older. *J Aging Phys Act*;**27**:230–3.  
55 doi:10.1123/japa.2018-0049 10.1123/japa.2018-0049  
56  
57  
58 48 Deathe AB, Miller WC. The L Test of Functional Mobility: Measurement Properties of a  
59  
60

- 1  
2  
3 Modified Version of the Timed “Up & Go” Test Designed for People With Lower-Limb  
4 Amputations. *Phys Ther* 2005;**85**:626–35. doi:10.1093/ptj/85.7.626  
5  
6  
7 49 Pham MH, Elshehabi M, Haertner L, *et al.* Validation of a Step Detection Algorithm during  
8 Straight Walking and Turning in Patients with Parkinson’s Disease and Older Adults Using an  
9 Inertial Measurement Unit at the Lower Back . *Front. Neurol.* .  
10 2017;**8**:457.https://www.frontiersin.org/article/10.3389/fneur.2017.00457  
11  
12  
13 50 Ciravegna F, Gao J, Ireson N, *et al.* Active 10: Brisk Walking to Support Regular Physical  
14 Activity. In: *Proceedings of the 13th EAI International Conference on Pervasive Computing*  
15 *Technologies for Healthcare*. New York, NY, USA: : Association for Computing Machinery  
16 2019. 11–20. doi:10.1145/3329189.3329208  
17  
18  
19  
20 51 Open Street Map. https://www.openstreetmap.org (accessed 18 Feb 2021).  
21  
22 52 Ordnance Survey Terrain 5. https://www.ordnancesurvey.co.uk/business-  
23 government/products/terrain-5 (accessed 18 Feb 2021).  
24  
25  
26 53 U.S. Releases Enhanced Shuttle Land Elevation Data. https://www2.jpl.nasa.gov/srtm/  
27 (accessed 18 Feb 2021).  
28  
29  
30 54 Rabinovich RA, Louvaris Z, Raste Y, *et al.* Validity of physical activity monitors during daily  
31 life in patients with COPD. *Eur Respir J* 2013;**42**:1205–15. doi:10.1183/09031936.00134312  
32  
33 55 Knight JF, Baber C, Schwirtz A, *et al.* The comfort assessment of wearable computers. *Proc -*  
34 *Int Symp Wearable Comput ISWC* 2002;**2002-Janua**:65–72. doi:10.1109/ISWC.2002.1167220  
35  
36  
37 56 Brooke J. SUS: a “quick and dirty” usability”. *Usability Eval Ind* 1196;**Jun 11**:189.  
38  
39 57 Lewis JR. IBM computer usability satisfaction questionnaires: Psychometric evaluation and  
40 instructions for use. *Int J Human-Computer Interact* 1995;**7**:57–78.  
41 doi:10.1080/10447319509526110  
42  
43  
44 58 Hiden H, Woodman S, Watson P, *et al.* Developing cloud applications using the e-Science  
45 Central platform. *Philos Trans R Soc A Math Phys Eng Sci* 2013;**371**.  
46 doi:10.1098/rsta.2012.0085  
47  
48  
49 59 Data Integrity and Compliance With CGMP. Guidance for Industry.  
50 https://www.fda.gov/files/drugs/published/Data-Integrity-and-Compliance-With-Current-  
51 Good-Manufacturing-Practice-Guidance-for-Industry.pdf (accessed 18 Feb 2021).  
52  
53  
54 60 Tietsch M, Muaremi A, Clay I, *et al.* Robust Step Detection from Different Waist-Worn  
55 Sensor Positions: Implications for Clinical Studies. *Digital biomarkers* 2020;**4**(1):50-8.  
56 doi:10.1159/000511611  
57  
58  
59 61 Kang H. The prevention and handling of the missing data. *Korean journal of anesthesiology*.

1  
2  
3 2013 May;64(5):402. doi:10.4097/kjae.2013.64.5.402  
4

- 5 62 Braun V, Clarke V. Using thematic analysis in psychology. *Qual Res Psychol* 2006;**3**:77–101.  
6 doi:10.1191/1478088706qp063oa  
7  
8  
9

## 10 11 **Figure legends**

12  
13  
14  
15 **Figure 1** – Concurrent domains to be assessed as part of a technical validation of digital mobility outcomes  
16 (DMOs) obtained from a wearable device.  
17

18  
19 **Figure 2** – Testing configurations used during (a) short static (plexiglass cube and device) and (b) dynamic  
20 (turntable and device) acquisitions. Marks (in red) are applied on both on the turntable and on the base to  
21 identify start/end, which have to align for the dynamic tests.  
22

23  
24 **Figure 3** – Illustration of the adopted marker set configuration. Markers were located on the right (RHEEL) and  
25 left (LHEEL) heels, toes (RTOE, LTOE) and on the INDIP units located on the right and left foot (RINDIP,  
26 LINDIP). Two additional reference markers were asymmetrically attached to the side of the foot to favour  
27 automatic recognition (RREF, LREF). Four additional markers were located on the DynaPort MM+ sensor  
28 (DYNAY, DYNAO, DYNAX, DYNAREF).  
29  
30

31  
32 **Figure 4** –Different components of the INDIP system. The figure on the left shows the pressure insoles and the  
33 connectors that link them to the distance sensors and the inertial modules. The picture on the right shows how  
34 the same system is then attached to the participant's foot and leg.  
35  
36

37  
38 **Figure 5** – Diagrams of the selected tasks: (A) Straight Walking Test, (B) Timed Up and Go, (C) L-Test, (D)  
39 Surface Test, (E) Hallway Test, (F) Schematic of the Daily living activities, (G) Description of the eight tasks  
40 performed during the Daily Living activities.  
41  
42  
43  
44  
45  
46  
47  
48  
49  
50  
51  
52  
53  
54  
55  
56  
57  
58  
59  
60



Concurrent domains to be assessed as part of a technical validation of digital mobility outcomes (DMOs) obtained from a wearable device.

1  
2  
3  
4  
5  
6  
7  
8  
9  
10  
11  
12  
13  
14  
15  
16  
17  
18  
19  
20  
21  
22  
23  
24  
25  
26  
27  
28  
29  
30  
31  
32  
33  
34  
35  
36  
37  
38  
39  
40  
41  
42  
43  
44  
45  
46  
47  
48  
49  
50  
51  
52  
53  
54  
55  
56  
57  
58  
59  
60



Testing configurations used during (a) short static (plexiglass cube and device) and (b) dynamic (turntable and device) acquisitions. Marks (in red) are applied on both on the turntable and on the base to identify start/end, which have to align for the dynamic tests.



Illustration of the adopted marker set configuration. Markers were located on the right (RHEEL) and left (LHEEL) heels, toes (RTOE, LTOE) and on the INDIP units located on the right and left foot (RINDIP, LINDIP). Two additional reference markers were asymmetrically attached to the side of the foot to favour automatic recognition (RREF, LREF). Four additional markers were located on the DynaPort MM+ sensor (DYNAY, DYNAO, DYNAX, DYNAREF).



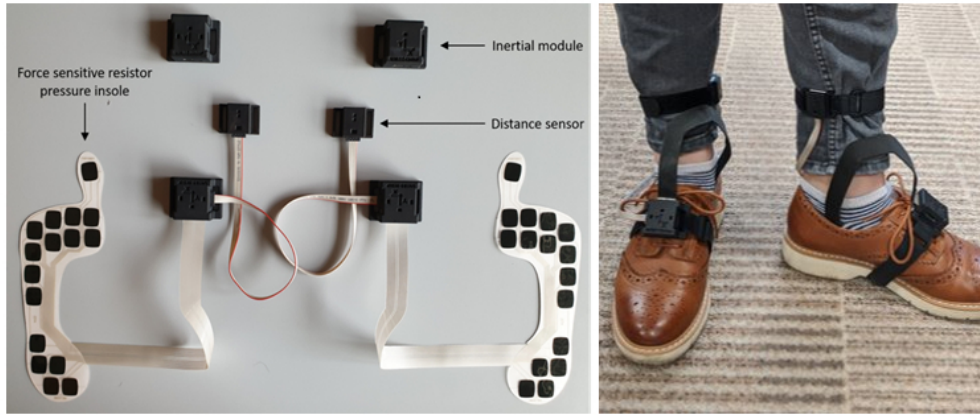

Different components of the INDIP system. The figure on the left shows the pressure insoles and the connectors that link them to the distance sensors and the inertial modules. The picture on the right shows how the same system is then attached to the participant's foot and leg.



Diagrams of the selected tasks: (A) Straight Walking Test, (B) Timed Up and Go, (C) L-Test, (D) Surface Test, (E) Hallway Test, (F) Schematic of the Daily living activities, (G) Description of the eight tasks performed during the Daily Living activities.

159x102mm (96 x 96 DPI)

## Mobilise-D Technical Validation Study

### Participant interview topic guide

#### Interview guide

**Note:** Questions in this topic guide are included to answer the above aims. If the participant is open and talks freely, they may answer some of the questions without being asked. Therefore, depending on the person, not all of these questions need to be asked. If they begin to talk about topics that may be interesting or relevant to the above aims, please feel free to continue to explore these, even if there is no specific question linked to it. In contrast, if participants are not very open, some potential prompts have been included with the questions below. These prompts are there as an optional guide and do not need to be used.

#### Dynaport questions

Aim: Ensure that the McRoberts Dynaport device is comfortable and acceptable to participants

#### Main questions

- 1 Can you describe your experience of using the Dynaport sensor in the last week?
- 2 Can you tell me what you liked about the device? Disliked?
  - Prompts if needed*
  - Size/weight
  - Attachment to body
  - Ease of use
  - Comfort
- 3 How did the device make you feel? / Can you describe what it felt like to wear the device?
  - Prompts if needed*
  - In social environments/at home
  - Interaction with daily activities
  - Emotions associated with being monitored
- 4 What you change about the device if you could?

#### Follow-up questions

"If you don't mind, I'd like to ask you some specific details about the device."

- 1 How did you find the process of putting it on and taking it off?
- 2 How did the device influence your daily activities?
  - Prompts if needed*
  - How were they impacted?

- How did this make them feel?

3 Can you tell me about any difficulties that you had with the device?

4 How did you feel about wearing the device for a week?

*Prompts if needed*

- How would they feel if it was longer?
- Any concerns for the week?

---

### Closing question

1 Is there anything else you would like me to know about the Dynaport?

---

### The use of wearable devices in healthcare questions

Aim: Explore the acceptability of wearable devices, for the purposes of healthcare monitoring, to participants in general.

### Main questions

1 Can you tell me about your experience of your health condition?

*Note:* Condition specific symptoms are listed at the end of this document.

2 Can you tell me about your experience of the care you've received for your condition?

*Prompts if needed*

- How do they feel about it?

3 Can you tell me about what sort of technology you currently use in your everyday life?

*Prompts if needed*

- How do you feel about using technology?
- What would make you use technology more? Less?
- Emotions associated with being monitored

4 What are your opinions on the use of technology in healthcare?

*Prompts if needed*

- What do you think it can be used for?

5 How would you feel about using technology to generate health information about yourself? (e.g. condition related smartphone app, self-reported outcomes platform, fitness tracker etc.),

*Prompts if needed*

- Why?
  - What would make you use it?
  - What would stop you from using it?
-

- What would need to change for you to use it?

### Follow-up questions

1 How do you feel about capturing health information in your daily life, using a wearable remote monitoring device?

2 How do you think digital technology used in your daily life would influence how you manage your condition?

*Prompts if needed*

- How would it impact their relationship with their health care provider?
- Integration into activities of daily living

3 How would you feel about sharing this data with your health care provider? What about researchers?

*Prompts if needed*

- Usefulness
- Impact of this

### Closing question

1 Is there anything else you would like me to know about using technology in healthcare?

## Researcher feedback

### Questionnaires

#### The System Usability Scale

To be completed by researchers who have collected data using the McRoberts device. When answering these questions please consider how you personally have found the McRoberts device, not how the participants have found it.

|                                                          | 1<br>strongly<br>disagree | 2 | 3 | 4 | 5<br>strongly<br>agree |
|----------------------------------------------------------|---------------------------|---|---|---|------------------------|
| I think that I would like to use this system frequently. |                           |   |   |   |                        |
| I found the system unnecessarily complex.                |                           |   |   |   |                        |
| I thought the system was easy to use.                    |                           |   |   |   |                        |

|                                                                                            |  |  |  |  |  |
|--------------------------------------------------------------------------------------------|--|--|--|--|--|
| I think that I would need the support of a technical person to be able to use this system. |  |  |  |  |  |
| I found the various functions in this system were well integrated.                         |  |  |  |  |  |
| I thought there was too much inconsistency in this system.                                 |  |  |  |  |  |
| I would imagine that most people would learn to use this system very quickly.              |  |  |  |  |  |
| I found the system very cumbersome to use.                                                 |  |  |  |  |  |
| I felt very confident using the system.                                                    |  |  |  |  |  |
| I needed to learn a lot of things before I could get going with this system.               |  |  |  |  |  |
| I think that I would like to use this system frequently.                                   |  |  |  |  |  |

**The IBM Computer System Usability Questionnaire**

To be completed by researchers who have collected data using the McRoberts device. When answering these questions please consider how you personally have found the McRoberts device, not how the participants have found it.

|                                                                 | 1<br>strongly<br>disagree | 2 | 3 | 4 | 5 | 6 | 7<br>Strongly<br>agree |
|-----------------------------------------------------------------|---------------------------|---|---|---|---|---|------------------------|
| Overall, I am satisfied with how easy it is to use this system. |                           |   |   |   |   |   |                        |
| It is simple to use this system.                                |                           |   |   |   |   |   |                        |
| I can effectively complete my work using this system.           |                           |   |   |   |   |   |                        |

|                            |                                                                                                                        |  |  |  |  |  |  |  |
|----------------------------|------------------------------------------------------------------------------------------------------------------------|--|--|--|--|--|--|--|
| 1<br>2<br>3<br>4<br>5<br>6 | I am able to complete my work quickly using this system.                                                               |  |  |  |  |  |  |  |
| 7<br>8<br>9                | I am able to efficiently complete my work using this system.                                                           |  |  |  |  |  |  |  |
| 10<br>11                   | I feel comfortable using this system.                                                                                  |  |  |  |  |  |  |  |
| 12<br>13                   | It was easy to learn to use this system.                                                                               |  |  |  |  |  |  |  |
| 14<br>15<br>16             | I believe I became productive quickly using this system.                                                               |  |  |  |  |  |  |  |
| 17<br>18<br>19             | The system gives error messages that clearly tell me how to fix problems.                                              |  |  |  |  |  |  |  |
| 20<br>21<br>22<br>23       | Whenever I make a mistake using the system, I recover easily and quickly.                                              |  |  |  |  |  |  |  |
| 24<br>25<br>26<br>27<br>28 | The information (such as on-line help, on-screen messages and other documentation) provided with this system is clear. |  |  |  |  |  |  |  |
| 29<br>30                   | It is easy to find the information I need.                                                                             |  |  |  |  |  |  |  |
| 31<br>32<br>33             | The information provided with the system is easy to understand.                                                        |  |  |  |  |  |  |  |
| 34<br>35<br>36             | The information is effective in helping me complete my work.                                                           |  |  |  |  |  |  |  |
| 37<br>38<br>39             | The organization of information on the system screens is clear.                                                        |  |  |  |  |  |  |  |
| 40<br>41                   | The interface of this system is pleasant.                                                                              |  |  |  |  |  |  |  |
| 42<br>43                   | I like using the interface of this system.                                                                             |  |  |  |  |  |  |  |
| 44<br>45<br>46<br>47       | This system has all the functions and capabilities I expect it to have.                                                |  |  |  |  |  |  |  |

### Intervention specific questionnaire

This questionnaire aims to evaluate your experiences and opinions on the processes of the Mobilise-D technical validation study. In particular, we are looking to focus on the components of the study which will also take place within the clinical validation trial. Therefore, when asking about certain aspects of the trial, we may be specific in relation to which device or measurement tool we want

feedback on. Please read each question carefully to ensure that your answers relate to the specific component under investigation.

The purpose of this questionnaire is to determine your opinions on i) the training you received, ii) the supporting materials that were provided to you, iii) the feasibility of conducting participant recruitment. Please answer each question honestly. All responses will be de-identified and treated anonymously.

*Training*

When considering training, we want you to consider the training that you received to carry out the following:

- Recruit participants
- Complete the human factors assessment
- Use the McRoberts device
- Use the ERT platform
- Use the EScience platform

Many of these training components would have been delivered separately. We want you to consider your experience on these training sessions overall, and then answer questions for each specific component independently. There is space to write comments at the end of this section if you wish to add more information or clarify any aspect further.

| <b>Overall training</b>                                                                                          | <b>Strongly disagree</b> | <b>Disagree</b> | <b>Neutral</b> | <b>Agree</b> | <b>Strongly agree</b> | <b>Not applicable</b> |
|------------------------------------------------------------------------------------------------------------------|--------------------------|-----------------|----------------|--------------|-----------------------|-----------------------|
|                                                                                                                  | <b>1</b>                 | <b>2</b>        | <b>3</b>       | <b>4</b>     | <b>5</b>              |                       |
| The Mobilise-D training programme was enjoyable                                                                  |                          |                 |                |              |                       |                       |
| The Mobilise-D training programme was useful                                                                     |                          |                 |                |              |                       |                       |
| The Mobilise-D training programme successfully prepared me to collect data within the technical validation trial |                          |                 |                |              |                       |                       |



The Mobilise-D training programme successfully prepared me to recruit participants within the technical validation trial

| <b>Overall training content</b> | <b>Strongly disagree</b> | <b>Disagree</b> | <b>Neutral</b> | <b>Agree</b> | <b>Strongly agree</b> | <b>Not applicable</b> |
|---------------------------------|--------------------------|-----------------|----------------|--------------|-----------------------|-----------------------|
|                                 | <b>1</b>                 | <b>2</b>        | <b>3</b>       | <b>4</b>     | <b>5</b>              |                       |

The training was sufficiently interactive

The training was interesting

The training was easy to understand

The training provided a clear outline of what was expected from me

The training provided a clear rationale of recruitment processes

| <b>Recruitment training</b> | <b>Strongly disagree</b> | <b>Disagree</b> | <b>Neutral</b> | <b>Agree</b> | <b>Strongly agree</b> | <b>Not applicable</b> |
|-----------------------------|--------------------------|-----------------|----------------|--------------|-----------------------|-----------------------|
|                             | <b>1</b>                 | <b>2</b>        | <b>3</b>       | <b>4</b>     | <b>5</b>              |                       |

I felt confident in my recruitment role following training

I felt competent to complete recruitment following training

Following training, I had no questions regarding recruitment

Following training I was confident in who I should

1  
2  
3  
4  
5  
6  
7  
8  
9  
10  
11  
12  
13  
14  
15  
16  
17  
18  
19  
20  
21  
22  
23  
24  
25  
26  
27  
28  
29  
30  
31  
32  
33  
34  
35  
36  
37  
38  
39  
40  
41  
42  
43  
44  
45  
46  
47  
48  
49  
50  
51  
52  
53  
54  
55  
56  
57  
58  
59  
60

contact if I had a question  
regarding recruitment

| <b>Data collection training</b> | <b>Strongly disagree</b> | <b>Disagree</b> | <b>Neutral</b> | <b>Agree</b> | <b>Strongly agree</b> | <b>Not applicable</b> |
|---------------------------------|--------------------------|-----------------|----------------|--------------|-----------------------|-----------------------|
|                                 | <b>1</b>                 | <b>2</b>        | <b>3</b>       | <b>4</b>     | <b>5</b>              |                       |

I felt confident in my data collection role following training

I felt competent to complete data collection following training

Following training, I had no questions regarding data collection

Following training I was confident in who I should contact if I had a question regarding data collection

| <b>McRoberts training</b> | <b>Strongly disagree</b> | <b>Disagree</b> | <b>Neutral</b> | <b>Agree</b> | <b>Strongly agree</b> | <b>Not applicable</b> |
|---------------------------|--------------------------|-----------------|----------------|--------------|-----------------------|-----------------------|
|                           | <b>1</b>                 | <b>2</b>        | <b>3</b>       | <b>4</b>     | <b>5</b>              |                       |

I felt confident in using McRoberts following training

I felt competent to complete data collection with McRoberts following training

Following training, I had no questions regarding the McRoberts device

Following training I was confident in who I should contact if I had a question regarding McRoberts

| ERT platform training | Strongly disagree | Disagree | Neutral | Agree | Strongly agree | Not applicable |
|-----------------------|-------------------|----------|---------|-------|----------------|----------------|
|                       | 1                 | 2        | 3       | 4     | 5              |                |

I felt confident in the use of the ERT platform following training

I felt competent to complete data collection using ERT following training

Following training, I had no questions regarding the ERT platform

Following training I was confident in who I should contact if I had a question regarding the ERT platform

Please provide us with any further feedback you have regarding the training that you undertook as part of the Mobilise-D project:

---

---

---

---

---

---

---

---

---

---

---

---

---

---

---

---

---

---

---

---

---

---

---

---

*Project materials feedback*

As part of the Mobilise-D project, you received a number of materials to help support you in the recruitment and data collection processes (i.e. manuals, etc). Please provide us with your feedback on these items

| <b>Recruitment materials</b> | <b>Strongly disagree</b> | <b>Disagree</b> | <b>Neutral</b> | <b>Agree</b> | <b>Strongly agree</b> | <b>Not applicable</b> |
|------------------------------|--------------------------|-----------------|----------------|--------------|-----------------------|-----------------------|
|                              | <b>1</b>                 | <b>2</b>        | <b>3</b>       | <b>4</b>     | <b>5</b>              |                       |

The recruitment materials were easy to understand

I used the recruitment materials a lot to help me recruit participants

As recruitment progressed I used the materials less

The materials answered all my recruitment questions

The materials made the recruitment process easier

When I used the materials I felt more confident in the recruitment process

| <b>Data collection materials</b> | <b>Strongly disagree</b> | <b>Disagree</b> | <b>Neutral</b> | <b>Agree</b> | <b>Strongly agree</b> | <b>Not applicable</b> |
|----------------------------------|--------------------------|-----------------|----------------|--------------|-----------------------|-----------------------|
|                                  | <b>1</b>                 | <b>2</b>        | <b>3</b>       | <b>4</b>     | <b>5</b>              |                       |

The data collection materials were easy to understand

I used the data collection materials a lot to help me recruit participants

As data collection progressed I used the materials less

The materials answered all my data collection questions

1  
2  
3 The materials made the data  
4 collection process easier

5  
6 When I used the materials I  
7 felt more confident in the  
8 data collection process  
9  
10

11  
12  
13 Please provide us with any further feedback you have regarding the materials that you received as  
14 part of the Mobilise-D project:  
15

16  
17  
18  
19  
20  
21  
22  
23  
24  
25  
26  
27  
28

29  
30 *Feasibility of the trial procedures*

31  
32  
33 **Recruitment**

34 How many participants did your site recruit?

35 How many participants was your site due to recruit?

36 What barriers to participant recruitment did you encounter?

37 What helped you to recruit people?

38 What additional materials do you believe would help support recruitment in the future?

39 What additional support do you believe would help support recruitment in the future?

40  
41  
42  
43  
44  
45  
46 **Data collection**

47 How many participants failed to complete full data collection procedures?

48 Why?

49 What additional materials do you believe would help support data collection in the future?

50 What additional support do you believe would help support data collection in the future?

51 Do you have any other thoughts regarding the recruitment and data collection procedures of the  
52 Mobilise-D technical validation trial?  
53  
54  
55  
56  
57  
58  
59  
60

## Researcher feedback

### Interview guide

Start with a general question about how they found the experience of data collection within the Mobilise-D validation study

#### The Dynaport device

- Tell me about how you found using the Dynaport sensor during the trial?
- What were your first impressions of the device?
- Can you tell me what you liked about the device? Disliked?
- Can you tell me about any difficulties that you had with the device or its platform during the trial?
  - Difficulties they encountered themselves
    - Set up
    - Ease of explanation for participants
  - Difficulties that were reported to them
    - Did participant get in contact during the week?
    - Did any devices come back damaged?
- How would you compare this device to other wearables that you have used before?

#### The ERT device

- Tell me about how you found using the ERT platform during the trial?
- What were your first impressions of the device?
- Did any of your opinions change as the trial progressed?
- Can you tell me what you liked about the device? Disliked?
- Can you tell me about any difficulties that you had with the device during the trial?
- How did the device make you feel?

#### The EScience platform

- Tell me about how you found using the EScience platform during the trial?

- What were your first impressions of the platform?
- Did any of your opinions change as the trial progressed?
- Can you tell me what you liked about the platform? Disliked?
- Can you tell me about any difficulties that you had with the device during the trial?

### **The training and materials used**

- Can you tell me what your opinions are of the training you received before starting data collection?

Specifically related to: Dynaport, EScience, ERT and recruitment procedures

- Duration
- Content
- Facilitators
- Materials provided
- What did you expect to get out of the training?
- What was useful about the training? Not useful?
- Describe how you found the process of data collection?
- How did this compare to what you expected following training?
- What would you change about the training if you could? And the materials provided?

### **Recruitment procedures**

Can you tell me about your experiences recruiting participants for the Mobilise-D trial  
What needs to change to make recruitment easier?
