# Supplementary material for: Technical validation of real-world monitoring of gait: a multicentric observational study
Source: PubMed Central journal article supplement — BMJ Open. 2021 Dec 2;11(12):e050785. doi: 10.1136/bmjopen-2021-050785 (PMC8640671; doi:10.1136/bmjopen-2021-050785), 2021-12-02
Supplement: bmjopen-2021-050785supp001.pdf [file bmjopen-2021-050785supp001.pdf]

## Mobilise-D Technical Validation Study

### Participant interview topic guide

#### Interview guide

**Note:** Questions in this topic guide are included to answer the above aims. If the participant is open and talks freely, they may answer some of the questions without being asked. Therefore, depending on the person, not all of these questions need to be asked. If they begin to talk about topics that may be interesting or relevant to the above aims, please feel free to continue to explore these, even if there is no specific question linked to it. In contrast, if participants are not very open, some potential prompts have been included with the questions below. These prompts are there as an optional guide and do not need to be used.

#### Dynaport questions

Aim: Ensure that the McRoberts Dynaport device is comfortable and acceptable to participants

#### Main questions

- 1 Can you describe your experience of using the Dynaport sensor in the last week?
- 2 Can you tell me what you liked about the device? Disliked?  
*Prompts if needed*
  - Size/weight
  - Attachment to body
  - Ease of use
  - Comfort
- 3 How did the device make you feel? / Can you describe what it felt like to wear the device?  
*Prompts if needed*
  - In social environments/at home
  - Interaction with daily activities
  - Emotions associated with being monitored
- 4 What you change about the device if you could?

#### Follow-up questions

"If you don't mind, I'd like to ask you some specific details about the device."

- 1 How did you find the process of putting it on and taking it off?
- 2 How did the device influence your daily activities?  
*Prompts if needed*
  - How were they impacted?

- How did this make them feel?
- 3 Can you tell me about any difficulties that you had with the device?
  - 4 How did you feel about wearing the device for a week?

*Prompts if needed*

- How would they feel if it was longer?
- Any concerns for the week?

---

**Closing question**

---

- 1 Is there anything else you would like me to know about the Dynaport?
- 

**The use of wearable devices in healthcare questions**

---

Aim: Explore the acceptability of wearable devices, for the purposes of healthcare monitoring, to participants in general.

**Main questions**

---

- 1 Can you tell me about your experience of your health condition?  
*Note: Condition specific symptoms are listed at the end of this document.*
  - 2 Can you tell me about your experience of the care you've received for your condition?  
*Prompts if needed*
    - How do they feel about it?
  - 3 Can you tell me about what sort of technology you currently use in your everyday life?  
*Prompts if needed*
    - How do you feel about using technology?
    - What would make you use technology more? Less?
    - Emotions associated with being monitored
  - 4 What are your opinions on the use of technology in healthcare?  
*Prompts if needed*
    - What do you think it can be used for?
  - 5 How would you feel about using technology to generate health information about yourself? (e.g. condition related smartphone app, self-reported outcomes platform, fitness tracker etc.),  
*Prompts if needed*
    - Why?
    - What would make you use it?
    - What would stop you from using it?
-

- What would need to change for you to use it?

#### Follow-up questions

- 1 How do you feel about capturing health information in your daily life, using a wearable remote monitoring device?
- 2 How do you think digital technology used in your daily life would influence how you manage your condition?

#### *Prompts if needed*

- How would it impact their relationship with their health care provider?
- Integration into activities of daily living

- 3 How would you feel about sharing this data with your health care provider? What about researchers?

#### *Prompts if needed*

- Usefulness
- Impact of this

#### Closing question

- 1 Is there anything else you would like me to know about using technology in healthcare?

### Researcher feedback

#### Questionnaires

#### The System Usability Scale

To be completed by researchers who have collected data using the McRoberts device. When answering these questions please consider how you personally have found the McRoberts device, not how the participants have found it.

|                                                          | 1<br>strongly<br>disagree | 2 | 3 | 4 | 5<br>strongly<br>agree |
|----------------------------------------------------------|---------------------------|---|---|---|------------------------|
| I think that I would like to use this system frequently. |                           |   |   |   |                        |
| I found the system unnecessarily complex.                |                           |   |   |   |                        |
| I thought the system was easy to use.                    |                           |   |   |   |                        |

|                                                                                            |  |  |  |  |  |
|--------------------------------------------------------------------------------------------|--|--|--|--|--|
| I think that I would need the support of a technical person to be able to use this system. |  |  |  |  |  |
| I found the various functions in this system were well integrated.                         |  |  |  |  |  |
| I thought there was too much inconsistency in this system.                                 |  |  |  |  |  |
| I would imagine that most people would learn to use this system very quickly.              |  |  |  |  |  |
| I found the system very cumbersome to use.                                                 |  |  |  |  |  |
| I felt very confident using the system.                                                    |  |  |  |  |  |
| I needed to learn a lot of things before I could get going with this system.               |  |  |  |  |  |
| I think that I would like to use this system frequently.                                   |  |  |  |  |  |

### The IBM Computer System Usability Questionnaire

To be completed by researchers who have collected data using the McRoberts device. When answering these questions please consider how you personally have found the McRoberts device, not how the participants have found it.

|                                                                 | 1<br>strongly<br>disagree | 2 | 3 | 4 | 5 | 6 | 7<br>Strongly<br>agree |
|-----------------------------------------------------------------|---------------------------|---|---|---|---|---|------------------------|
| Overall, I am satisfied with how easy it is to use this system. |                           |   |   |   |   |   |                        |
| It is simple to use this system.                                |                           |   |   |   |   |   |                        |
| I can effectively complete my work using this system.           |                           |   |   |   |   |   |                        |

|                                                                                                                        |  |  |  |  |  |  |  |
|------------------------------------------------------------------------------------------------------------------------|--|--|--|--|--|--|--|
| I am able to complete my work quickly using this system.                                                               |  |  |  |  |  |  |  |
| I am able to efficiently complete my work using this system.                                                           |  |  |  |  |  |  |  |
| I feel comfortable using this system.                                                                                  |  |  |  |  |  |  |  |
| It was easy to learn to use this system.                                                                               |  |  |  |  |  |  |  |
| I believe I became productive quickly using this system.                                                               |  |  |  |  |  |  |  |
| The system gives error messages that clearly tell me how to fix problems.                                              |  |  |  |  |  |  |  |
| Whenever I make a mistake using the system, I recover easily and quickly.                                              |  |  |  |  |  |  |  |
| The information (such as on-line help, on-screen messages and other documentation) provided with this system is clear. |  |  |  |  |  |  |  |
| It is easy to find the information I need.                                                                             |  |  |  |  |  |  |  |
| The information provided with the system is easy to understand.                                                        |  |  |  |  |  |  |  |
| The information is effective in helping me complete my work.                                                           |  |  |  |  |  |  |  |
| The organization of information on the system screens is clear.                                                        |  |  |  |  |  |  |  |
| The interface of this system is pleasant.                                                                              |  |  |  |  |  |  |  |
| I like using the interface of this system.                                                                             |  |  |  |  |  |  |  |
| This system has all the functions and capabilities I expect it to have.                                                |  |  |  |  |  |  |  |

### Intervention specific questionnaire

This questionnaire aims to evaluate your experiences and opinions on the processes of the Mobilise-D technical validation study. In particular, we are looking to focus on the components of the study which will also take place within the clinical validation trial. Therefore, when asking about certain aspects of the trial, we may be specific in relation to which device or measurement tool we want

feedback on. Please read each question carefully to ensure that your answers relate to the specific component under investigation.

The purpose of this questionnaire is to determine your opinions on i) the training you received, ii) the supporting materials that were provided to you, iii) the feasibility of conducting participant recruitment. Please answer each question honestly. All responses will be de-identified and treated anonymously.

### Training

When considering training, we want you to consider the training that you received to carry out the following:

- Recruit participants
- Complete the human factors assessment
- Use the McRoberts device
- Use the ERT platform
- Use the EScience platform

Many of these training components would have been delivered separately. We want you to consider your experience on these training sessions overall, and then answer questions for each specific component independently. There is space to write comments at the end of this section if you wish to add more information or clarify any aspect further.

| Overall training                                                                                                 | Strongly disagree | Disagree | Neutral | Agree | Strongly agree | Not applicable |
|------------------------------------------------------------------------------------------------------------------|-------------------|----------|---------|-------|----------------|----------------|
|                                                                                                                  | 1                 | 2        | 3       | 4     | 5              |                |
| The Mobilise-D training programme was enjoyable                                                                  |                   |          |         |       |                |                |
| The Mobilise-D training programme was useful                                                                     |                   |          |         |       |                |                |
| The Mobilise-D training programme successfully prepared me to collect data within the technical validation trial |                   |          |         |       |                |                |

---

The Mobilise-D training programme successfully prepared me to recruit participants within the technical validation trial

| <b>Overall training content</b> | <b>Strongly disagree</b> | <b>Disagree</b> | <b>Neutral</b> | <b>Agree</b> | <b>Strongly agree</b> | <b>Not applicable</b> |
|---------------------------------|--------------------------|-----------------|----------------|--------------|-----------------------|-----------------------|
|                                 | <b>1</b>                 | <b>2</b>        | <b>3</b>       | <b>4</b>     | <b>5</b>              |                       |

The training was sufficiently interactive

---

The training was interesting

---

The training was easy to understand

---

The training provided a clear outline of what was expected from me

---

The training provided a clear rationale of recruitment processes

| <b>Recruitment training</b> | <b>Strongly disagree</b> | <b>Disagree</b> | <b>Neutral</b> | <b>Agree</b> | <b>Strongly agree</b> | <b>Not applicable</b> |
|-----------------------------|--------------------------|-----------------|----------------|--------------|-----------------------|-----------------------|
|                             | <b>1</b>                 | <b>2</b>        | <b>3</b>       | <b>4</b>     | <b>5</b>              |                       |

I felt confident in my recruitment role following training

---

I felt competent to complete recruitment following training

---

Following training, I had no questions regarding recruitment

---

Following training I was confident in who I should

---

---

contact if I had a question  
regarding recruitment

| <b>Data collection training</b> | <b>Strongly disagree</b> | <b>Disagree</b> | <b>Neutral</b> | <b>Agree</b> | <b>Strongly agree</b> | <b>Not applicable</b> |
|---------------------------------|--------------------------|-----------------|----------------|--------------|-----------------------|-----------------------|
|                                 | <b>1</b>                 | <b>2</b>        | <b>3</b>       | <b>4</b>     | <b>5</b>              |                       |

I felt confident in my data  
collection role following  
training

---

I felt competent to complete  
data collection following  
training

---

Following training, I had no  
questions regarding data  
collection

---

Following training I was  
confident in who I should  
contact if I had a question  
regarding data collection

| <b>McRoberts training</b> | <b>Strongly disagree</b> | <b>Disagree</b> | <b>Neutral</b> | <b>Agree</b> | <b>Strongly agree</b> | <b>Not applicable</b> |
|---------------------------|--------------------------|-----------------|----------------|--------------|-----------------------|-----------------------|
|                           | <b>1</b>                 | <b>2</b>        | <b>3</b>       | <b>4</b>     | <b>5</b>              |                       |

I felt confident in using  
McRoberts following training

---

I felt competent to complete  
data collection with  
McRoberts following training

---

Following training, I had no  
questions regarding the  
McRoberts device

---

Following training I was  
confident in who I should  
contact if I had a question  
regarding McRoberts

---



| <b>ERT platform training</b>                                                                              | <b>Strongly disagree</b> | <b>Disagree</b> | <b>Neutral</b> | <b>Agree</b> | <b>Strongly agree</b> | <b>Not applicable</b> |
|-----------------------------------------------------------------------------------------------------------|--------------------------|-----------------|----------------|--------------|-----------------------|-----------------------|
|                                                                                                           | <b>1</b>                 | <b>2</b>        | <b>3</b>       | <b>4</b>     | <b>5</b>              |                       |
| I felt confident in the use of the ERT platform following training                                        |                          |                 |                |              |                       |                       |
| I felt competent to complete data collection using ERT following training                                 |                          |                 |                |              |                       |                       |
| Following training, I had no questions regarding the ERT platform                                         |                          |                 |                |              |                       |                       |
| Following training I was confident in who I should contact if I had a question regarding the ERT platform |                          |                 |                |              |                       |                       |

Please provide us with any further feedback you have regarding the training that you undertook as part of the Mobilise-D project:

---



---



---



---



---



---



---



---



---



---



---



---



---



---



---



---

*Project materials feedback*

As part of the Mobilise-D project, you received a number of materials to help support you in the recruitment and data collection processes (i.e. manuals, etc). Please provide us with your feedback on these items

| <b>Recruitment materials</b>                                               | <b>Strongly disagree</b> | <b>Disagree</b> | <b>Neutral</b> | <b>Agree</b> | <b>Strongly agree</b> | <b>Not applicable</b> |
|----------------------------------------------------------------------------|--------------------------|-----------------|----------------|--------------|-----------------------|-----------------------|
|                                                                            | <b>1</b>                 | <b>2</b>        | <b>3</b>       | <b>4</b>     | <b>5</b>              |                       |
| The recruitment materials were easy to understand                          |                          |                 |                |              |                       |                       |
| I used the recruitment materials a lot to help me recruit participants     |                          |                 |                |              |                       |                       |
| As recruitment progressed I used the materials less                        |                          |                 |                |              |                       |                       |
| The materials answered all my recruitment questions                        |                          |                 |                |              |                       |                       |
| The materials made the recruitment process easier                          |                          |                 |                |              |                       |                       |
| When I used the materials I felt more confident in the recruitment process |                          |                 |                |              |                       |                       |
| <b>Data collection materials</b>                                           | <b>Strongly disagree</b> | <b>Disagree</b> | <b>Neutral</b> | <b>Agree</b> | <b>Strongly agree</b> | <b>Not applicable</b> |
|                                                                            | <b>1</b>                 | <b>2</b>        | <b>3</b>       | <b>4</b>     | <b>5</b>              |                       |
| The data collection materials were easy to understand                      |                          |                 |                |              |                       |                       |
| I used the data collection materials a lot to help me recruit participants |                          |                 |                |              |                       |                       |
| As data collection progressed I used the materials less                    |                          |                 |                |              |                       |                       |
| The materials answered all my data collection questions                    |                          |                 |                |              |                       |                       |

---

The materials made the data  
collection process easier

---

When I used the materials I  
felt more confident in the  
data collection process

---

Please provide us with any further feedback you have regarding the materials that you received as part of the Mobilise-D project:

---

---

---

---

---

---

---

---

### *Feasibility of the trial procedures*

#### **Recruitment**

How many participants did your site recruit?

How many participants was your site due to recruit?

What barriers to participant recruitment did you encounter?

What helped you to recruit people?

What additional materials do you believe would help support recruitment in the future?

What additional support do you believe would help support recruitment in the future?

#### **Data collection**

How many participants failed to complete full data collection procedures?

Why?

What additional materials do you believe would help support data collection in the future?

What additional support do you believe would help support data collection in the future?

Do you have any other thoughts regarding the recruitment and data collection procedures of the Mobilise-D technical validation trial?

## Researcher feedback

### Interview guide

Start with a general question about how they found the experience of data collection within the Mobilise-D validation study

#### The Dynaport device

- Tell me about how you found using the Dynaport sensor during the trial?
- What were your first impressions of the device?
- Can you tell me what you liked about the device? Disliked?
- Can you tell me about any difficulties that you had with the device or its platform during the trial?
  - Difficulties they encountered themselves
    - Set up
    - Ease of explanation for participants
  - Difficulties that were reported to them
    - Did participant get in contact during the week?
    - Did any devices come back damaged?
- How would you compare this device to other wearables that you have used before?

#### The ERT device

- Tell me about how you found using the ERT platform during the trial?
- What were your first impressions of the device?
- Did any of your opinions change as the trial progressed?
- Can you tell me what you liked about the device? Disliked?
- Can you tell me about any difficulties that you had with the device during the trial?
- How did the device make you feel?

#### The EScience platform

- Tell me about how you found using the EScience platform during the trial?

- What were your first impressions of the platform?
- Did any of your opinions change as the trial progressed?
- Can you tell me what you liked about the platform? Disliked?
- Can you tell me about any difficulties that you had with the device during the trial?

### **The training and materials used**

- Can you tell me what your opinions are of the training you received before starting data collection?

Specifically related to: Dynaport, EScience, ERT and recruitment procedures

- Duration
- Content
- Facilitators
- Materials provided
- What did you expect to get out of the training?
- What was useful about the training? Not useful?
- Describe how you found the process of data collection?
- How did this compare to what you expected following training?
- What would you change about the training if you could? And the materials provided?

### **Recruitment procedures**

Can you tell me about your experiences recruiting participants for the Mobilise-D trial

What needs to change to make recruitment easier?
